# Supplementary material for: Iodine-catalyzed synthesis of N,N′-diaryl-o-phenylenediamines from cyclohexanones and anilines using DMSO and O2 as oxidants
Source: Royal Society of Chemistry journal article supplement (doi:10.1039/c8cc05320k), 2018-01-01

## Supporting Information

### Iodine-catalyzed synthesis of *N,N'*-diaryl-*o*-phenylenediamines from cyclohexanones and anilines using DMSO and O<sub>2</sub> as oxidant

Mingteng Xiong, Zhan Gao, Xiao Liang, Pengfei Cai, Heping Zhu and Yuanjiang  
Pan\*

Department of Chemistry, Zhejiang University, Hangzhou 310027, China.  
E-mail: panyuanjiang@zju.edu.cn.

### Content

|                                                                  |     |
|------------------------------------------------------------------|-----|
| <b>1. Experimental section</b> .....                             | S1  |
| 1.1 General information.....                                     | S1  |
| 1.2 Optimization of Reaction Conditions .....                    | S1  |
| 1.3 General Procedure for the Synthesis of <b>3</b> .....        | S4  |
| 1.4 General Procedure for the Synthesis of <b>5</b> .....        | S5  |
| 1.5 The detailed comparison of several methods.....              | S6  |
| <b>2. Characterization Data for Products</b> .....               | S7  |
| <b>3. <sup>1</sup>H NMR and <sup>13</sup>C NMR spectra</b> ..... | S19 |

## 1. Experimental section

### 1.1. General information

All solvents and chemicals used in the experiments were obtained from common commercial suppliers and used without further purification. Unless otherwise noted, all reactions were carried out in the oven-dried Schlenk tube under air condition. Flash column chromatography was performed on 300-400 mesh silica gel. All NMR spectra were recorded Bruker Ascend-400 spectrometry at 400MHz in CDCl<sub>3</sub> for <sup>1</sup>H NMR and <sup>13</sup>C NMR, respectively. For <sup>1</sup>H NMR, tetramethylsilane (TMS) served as internal standard ( $\delta = 0.0$  ppm) and data are recorded as follows: chemical shift, multiplicity (s = singlet, d = doublet, t = triplet, q = quartet, m = multiplet, br = broad), coupling constants (Hz) and integration. For <sup>13</sup>C NMR, CDCl<sub>3</sub> worked as internal standard ( $\delta = 77.160$  ppm) and spectra were obtained with complete proton decoupling. Melting points were measured with SGW X-4 apparatus. Accurate mass measurements were performed on IT-TOF (Shimadzu, Japan) equipped with an ESI source in positive ion mode.

### 1.2. Optimization of Reaction Conditions

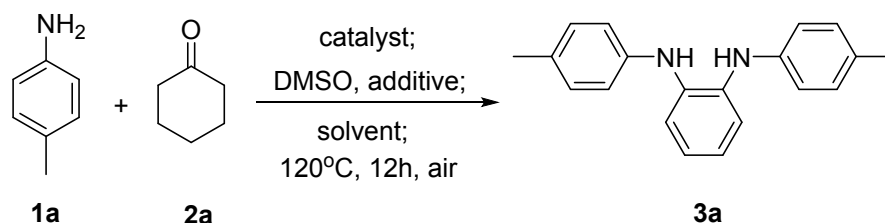

| Entry | Catalyst<br>(equiv.) | Oxidant/additive<br>(equiv.) | Solvent            | Yield <sup>b</sup> / % |
|-------|----------------------|------------------------------|--------------------|------------------------|
| 1     | I <sub>2</sub> (0.2) | -                            | DMSO               | 19                     |
| 2     | I <sub>2</sub> (0.2) | DMSO (5)                     | CH <sub>3</sub> OH | 24                     |
| 3     | I <sub>2</sub> (0.2) | DMSO (5)                     | DMA                | 12                     |
| 4     | I <sub>2</sub> (0.2) | DMSO (5)                     | 1,4-dioxane        | 10                     |
| 5     | I <sub>2</sub> (0.2) | DMSO (5)                     | CH <sub>3</sub> CN | 13                     |
| 6     | I <sub>2</sub> (0.2) | DMSO (5)                     | THF                | 8                      |
| 7     | I <sub>2</sub> (0.2) | DMSO (5)                     | HMPA               | 37                     |
| 8     | I <sub>2</sub> (0.2) | DMSO (5)                     | <i>t</i> -Amyl-OH  | 28                     |
| 9     | I <sub>2</sub> (0.2) | DMSO (5)                     | TBME               | trace                  |

|                 |                                             |                                                             |                   |           |
|-----------------|---------------------------------------------|-------------------------------------------------------------|-------------------|-----------|
| 10              | I <sub>2</sub> (0.2)                        | DMSO (5)                                                    | DCE               | trace     |
| 11              | I <sub>2</sub> (0.2)                        | DMSO (5)                                                    | CHCl <sub>3</sub> | N.D.      |
| 12              | I <sub>2</sub> (0.2)                        | DMSO (5)                                                    | AcOH              | trace     |
| 13              | I <sub>2</sub> (0.2)                        | DMSO (5)                                                    | EA                | 8         |
| 14              | I <sub>2</sub> (0.2)                        | DMSO (5)                                                    | PhCH <sub>3</sub> | 5         |
| 15              | I <sub>2</sub> (0.2)                        | DMSO (5) / Oxone (3)                                        | HMPA              | 22        |
| 16              | I <sub>2</sub> (0.2)                        | DMSO (5) / BzOOBu- <i>t</i> (3)                             | HMPA              | trace     |
| 17              | I <sub>2</sub> (0.2)                        | DMSO (5) / K <sub>2</sub> S <sub>2</sub> O <sub>4</sub> (3) | HMPA              | 11        |
| 18              | I <sub>2</sub> (0.2)                        | DMSO (5) / BzOOBz(3)                                        | HMPA              | trace     |
| 19              | I <sub>2</sub> (0.2)                        | DMSO (5) / <i>t</i> -BuOOH (3)                              | HMPA              | 19        |
| 20              | I <sub>2</sub> (0.2)                        | DMSO (5) / H <sub>2</sub> O <sub>2</sub> (3)                | HMPA              | 16        |
| 21              | I <sub>2</sub> (0.2)                        | DMSO (5) / <i>t</i> -BzOOBu- <i>t</i> (3)                   | HMPA              | 14        |
| 22 <sup>c</sup> | I <sub>2</sub> (0.2)                        | DMSO (5) / 3Å MS                                            | HMPA              | 29        |
| 23 <sup>c</sup> | I <sub>2</sub> (0.2)                        | DMSO (5) / 4Å MS                                            | HMPA              | 30        |
| 24              | I <sub>2</sub> (0.2)                        | DMSO (5) / MgSO <sub>4</sub> (3)                            | HMPA              | 23        |
| 25              | I <sub>2</sub> (0.2)                        | DMSO (5) / Na <sub>2</sub> SO <sub>4</sub> (3)              | HMPA              | 27        |
| 26              | I <sub>2</sub> (0.2)                        | DMSO (5) / TsOH (1)                                         | HMPA              | 43        |
| 27              | I <sub>2</sub> (0.2)                        | DMSO (5) / TfOH (1)                                         | HMPA              | 42        |
| 28              | I <sub>2</sub> (0.2)                        | DMSO (5) / AcOH (1)                                         | HMPA              | 29        |
| 29              | I <sub>2</sub> (0.2)                        | DMSO (5) / HCl (1)                                          | HMPA              | 51        |
| 30              | I <sub>2</sub> (0.2)                        | DMSO (5) / MsOH (1)                                         | HMPA              | 54        |
| 31              | I <sub>2</sub> (0.2)                        | DMSO (5) / BF <sub>3</sub> ·Et <sub>2</sub> O (1)           | HMPA              | 48        |
| 32              | I <sub>2</sub> (0.2)                        | DMSO (5) / AlCl <sub>3</sub> (1)                            | HMPA              | 40        |
| 33              | I <sub>2</sub> (0.2)                        | DMSO (5) / FeBr <sub>3</sub> (1)                            | HMPA              | trace     |
| 34              | I <sub>2</sub> (0.2)                        | DMSO (5) / CF <sub>3</sub> COOH (1)                         | HMPA              | 47        |
| 35              | KI(0.2)                                     | DMSO (5) / MsOH (1)                                         | HMPA              | 46        |
| 36              | LiI(0.2)                                    | DMSO (5) / MsOH (1)                                         | HMPA              | 48        |
| 37              | HI(0.2)                                     | DMSO (5) / MsOH (1)                                         | HMPA              | 39        |
| 38              | <i>n</i> -Bu <sub>4</sub> NI(0.2)           | DMSO (5) / MsOH (1)                                         | HMPA              | 40        |
| 39              | NIS(0.2)                                    | DMSO (5) / MsOH (1)                                         | HMPA              | 49        |
| 40              | (CH <sub>3</sub> ) <sub>4</sub> NI<br>(0.2) | DMSO (5) / MsOH (1)                                         | HMPA              | 52        |
| 41              | I <sub>2</sub> (0.2)                        | DMSO (4) / MsOH (1)                                         | HMPA              | 45        |
| 42              | I <sub>2</sub> (0.2)                        | DMSO (7) / MsOH (1)                                         | HMPA              | 63        |
| 43              | I <sub>2</sub> (0.2)                        | DMSO (9) / MsOH (1)                                         | HMPA              | 59        |
| 44              | I <sub>2</sub> (0.2)                        | DMSO (7) / MsOH (0.3)                                       | HMPA              | 70        |
| 45              | <b>I<sub>2</sub> (0.2)</b>                  | <b>DMSO (7) / MsOH (0.4)</b>                                | <b>HMPA</b>       | <b>73</b> |
| 46              | I <sub>2</sub> (0.2)                        | DMSO (7) / MsOH (0.6)                                       | HMPA              | 70        |

|                 |                      |                       |      |       |
|-----------------|----------------------|-----------------------|------|-------|
| 47              | I <sub>2</sub> (0.2) | DMSO (7) / MsOH (0.8) | HMPA | 66    |
| 48              | I <sub>2</sub> (0.1) | DMSO (7) / MsOH (0.4) | HMPA | 61    |
| 49              | I <sub>2</sub> (0.3) | DMSO (7) / MsOH (0.4) | HMPA | 66    |
| 50              | I <sub>2</sub> (0.5) | DMSO (7) / MsOH (0.4) | HMPA | 57    |
| 51              | I <sub>2</sub> (1.0) | DMSO (7) / MsOH (0.4) | HMPA | 48    |
| 52 <sup>d</sup> | I <sub>2</sub> (0.2) | DMSO (7) / MsOH (0.4) | HMPA | 51    |
| 53 <sup>e</sup> | I <sub>2</sub> (0.2) | DMSO (7) / MsOH (0.4) | HMPA | 60    |
| 54 <sup>f</sup> | I <sub>2</sub> (0.2) | DMSO (7) / MsOH (0.4) | HMPA | 74    |
| 55 <sup>g</sup> | I <sub>2</sub> (0.2) | DMSO (7) / MsOH (0.4) | HMPA | 71    |
| 56 <sup>h</sup> | I <sub>2</sub> (0.2) | DMSO (7) / MsOH (0.4) | HMPA | 23    |
| 57 <sup>i</sup> | I <sub>2</sub> (0.2) | DMSO (7)/MsOH (0.4)   | HMPA | 11    |
| 58              | I <sub>2</sub> (0.2) | MsOH (0.4)            | HMPA | trace |
| 59              | -                    | DMSO (7) / MsOH (0.4) | HMPA | N.D.  |

<sup>a</sup>Reaction conditions: **1a** (4equiv.), **2a** (0.25 mmol), catalyst (20 mol%), DMSO, additive, solvent (1 mL), stirred at 120 °C under air for 12 h. <sup>b</sup>Determined by <sup>1</sup>H NMR analysis using benzyl ether as an internal standard. <sup>c</sup>100 mg molecular sieve. <sup>d</sup>100 °C. <sup>e</sup>110 °C. <sup>f</sup>130 °C. <sup>g</sup>24 h. <sup>h</sup>Under nitrogen atmosphere. <sup>i</sup>Under oxygen atmosphere.

### 1.3 General Procedure for the Synthesis of **3**

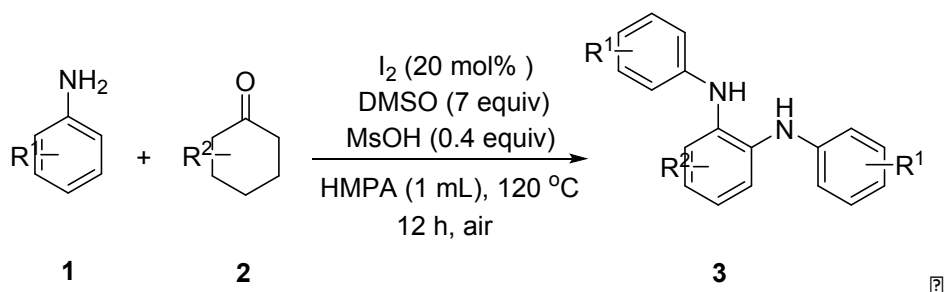

To an oven-dried Schlenk tube with a magnetic bar were added sequentially I<sub>2</sub> (0.05 mmol, 13 mg, 20 mol%), aniline derivatives **1** (1 mmol, 4 equiv.), cyclohexanone derivatives **2** (0.25 mmol), HMPA (1mL), DMSO (1.75 mmol, 126  $\mu$ L, 7 equiv.) and MsOH (0.1 mmol, 6.4  $\mu$ L, 0.4 equiv.) under air condition. The Schlenk tube was capped with a cap and heated to 120 °C for 12 h. Upon cooling to room temperature, the reaction mixture was added to water (30 mL), extracted with ethyl acetate (3  $\times$  10 mL). The organic layers were combined, dried with anhydrous Na<sub>2</sub>SO<sub>4</sub>, filtered and concentrated under reduced pressure to afford the residue, which was purified by flash column chromatography on a silica gel using a mixture of petroleum

ether and ethyl acetate to give the products **3**.

#### 1.4 General Procedure for the Synthesis of **5**

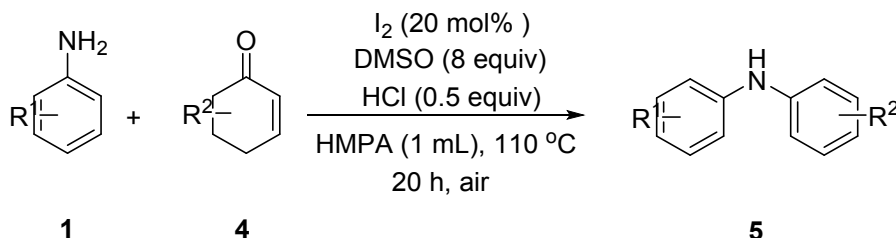

To an oven-dried Schlenk tube with a magnetic bar were added sequentially I<sub>2</sub> (0.05 mmol, 13 mg, 20 mol%), aniline derivatives **2** (0.25 mmol), cyclohexenone derivatives **4** (0.75 mmol, 3 equiv.), HMPA (1mL), DMSO (2 mmol, 142 μL, 8 equiv.) and 12M HCl (0.125 mmol, 12 μL, 0.5 equiv.) under air condition. The Schlenk tube was capped with a cap and heated to 110 °C for 20 h. Upon cooling to room temperature, the reaction mixture was added to water (30 mL), extracted with ethyl acetate (3 × 10 mL). The organic layers were combined, dried with anhydrous Na<sub>2</sub>SO<sub>4</sub>, filtered and concentrated under reduced pressure to afford the residue, which was purified by flash column chromatography on a silica gel using a mixture of petroleum ether and ethyl acetate to give the products **5**.

## 1.5 The detailed comparison of several methods to synthesize N,N'-diaryl-o-phenylenediamines

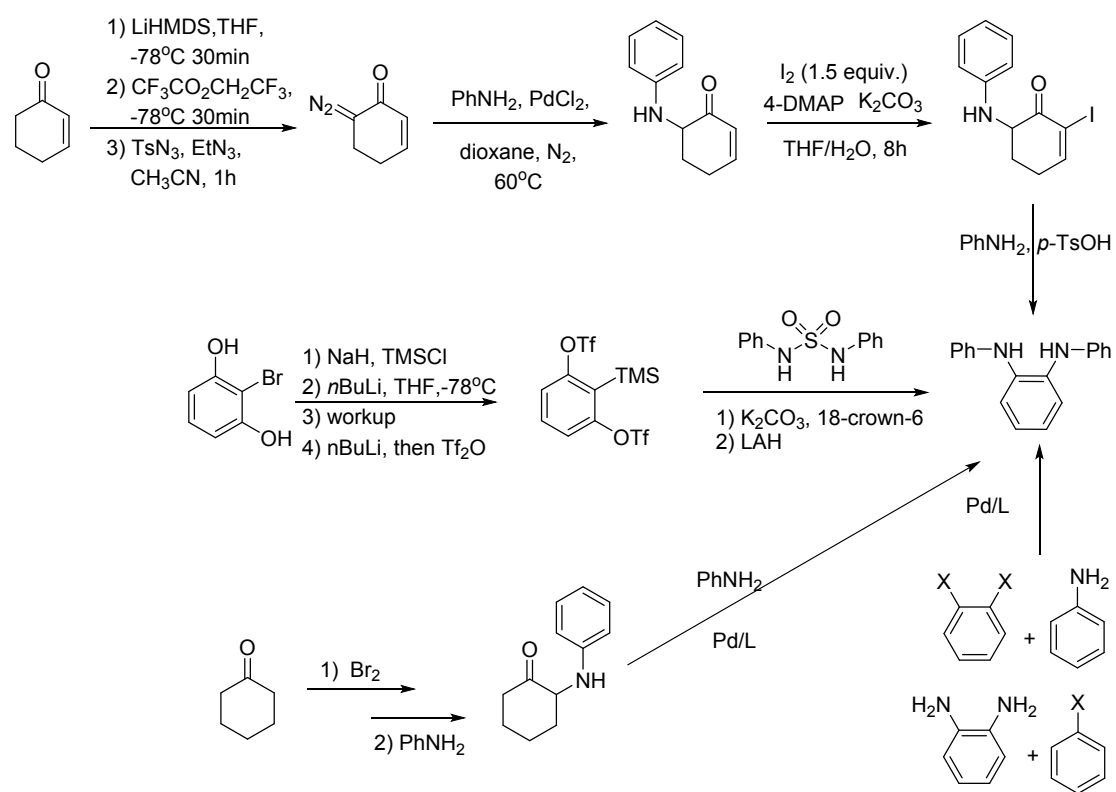

## 2. Characterization Data for Products

**Attention: Maybe due to high asymmetry and electrical quadrupole moment, the signal response of some N,N'-diaryl-*o*-phenylenediamines is weak, so it's very hard to eliminate the impure peaks of NMR spectra, especially 3p-3s, because of experimental condition (40-60 mg sample, dissolved in 0.5 mL CD<sub>3</sub>Cl, was scanned under NMR equipment for 2-3h). And the best NMR spectra were chose and presented here after many repeated experimented.**

### N, N'-bis(4-methylphenyl)-1,2-benzenediamine (3a)<sup>1</sup>:

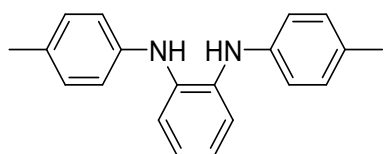

Yellow oil (51.3 mg, 71%). <sup>1</sup>H NMR (400 MHz, CDCl<sub>3</sub>) δ 7.23 – 7.18 (m, 2H), 7.05 (d, *J* = 8.1 Hz, 4H), 6.94 – 6.89 (m, 2H), 6.85 (d, *J* = 8.4 Hz, 4H), 5.51 (br, 2H), 2.28 (s, 6H). <sup>13</sup>C NMR (101 MHz, CDCl<sub>3</sub>) δ 141.47, 135.38, 130.32, 129.98, 122.64, 119.61, 118.01, 20.76. HRMS (ESI): *m/z* calcd. for C<sub>20</sub>H<sub>21</sub>N<sub>2</sub> [M+H]<sup>+</sup>: 289.1699, found: 289.1711.

### N, N'-diphenyl-1,2-benzenediamine (3b)<sup>1</sup>:

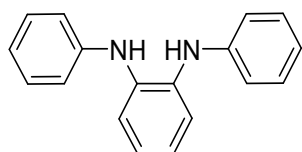

Off-white solid (32.5 mg, 50%). Mp=102-104 °C. <sup>1</sup>H NMR (400 MHz, CDCl<sub>3</sub>) δ 7.22 – 7.19 (m, 2H), 7.17 - 7.12 (m, 4H), 6.90 – 6.87 (m, 2H), 6.85 - 6.79 (m, 6H), 5.52 (br, 2H); <sup>13</sup>C NMR (101 MHz, CDCl<sub>3</sub>) δ 144.02, 135.01, 129.46, 123.11, 120.70, 120.33, 117.33; HRMS (ESI): *m/z* calcd. for C<sub>18</sub>H<sub>17</sub>N<sub>2</sub> [M+H]<sup>+</sup>: 261.1386, found: 261.1375.

### N, N'-bis(4-*tert*-butylphenyl)-1,2-benzenediamine (3c)<sup>2</sup>:

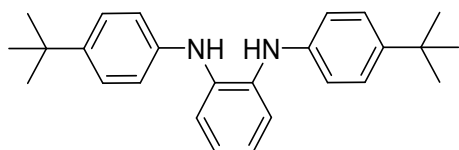

Yellow oil (54.8 mg, 59%). <sup>1</sup>H NMR (400 MHz, CDCl<sub>3</sub>) δ 7.19 – 7.16 (m, 6H), 6.86 – 6.82 (m, 2H), 6.81 – 6.78 (m, 4H), 5.46 (br, 2H), 1.21 (s, 18H). <sup>13</sup>C NMR (101 MHz, CDCl<sub>3</sub>) δ 143.65, 141.46, 135.29, 126.24, 122.67, 119.80, 117.40, 34.23, 31.62. HRMS (ESI): *m/z* calcd. for C<sub>26</sub>H<sub>33</sub>N<sub>2</sub> [M+H]<sup>+</sup>: 373.2638, found: 373.2614.

### N, N'-bis(4-benzylphenyl)-1,2-benzenediamine (3d):

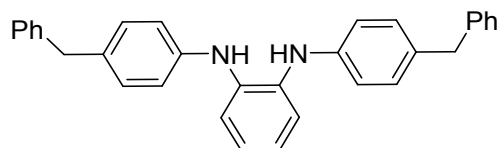

Yellow oil (58.5 mg, 63%).  $^1\text{H NMR}$  (400 MHz,  $\text{CDCl}_3$ )  $\delta$  7.20 – 7.08 (m, 12H), 6.95 (d,  $J = 8.3$  Hz, 4H), 6.86 – 6.81 (m, 2H), 6.75 (d,  $J = 8.3$  Hz, 4H), 5.42 (br, 2H), 3.81 (s, 4H).  $^{13}\text{C NMR}$  (101 MHz,  $\text{CDCl}_3$ )  $\delta$  142.10, 141.67, 135.15, 133.53, 129.88, 128.95, 128.54, 126.08, 122.82, 119.91, 117.75, 41.28. HRMS (ESI):  $m/z$  calcd. for  $\text{C}_{32}\text{H}_{29}\text{N}_2$   $[\text{M}+\text{H}]^+$ : 441.2325, found: 441.2318.

**N, N'-bis(4-methoxyphenyl)-1,2-benzenediamine (3e)<sup>2</sup>:**

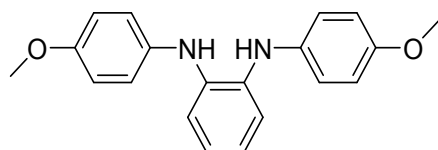

Yellow oil (43.7 mg, 55%).  $^1\text{H NMR}$  (400 MHz,  $\text{CDCl}_3$ )  $\delta$  7.12 – 7.07 (m, 2H), 6.94 – 6.90 (m, 4H), 6.89 – 6.87 (m, 2H), 6.86 – 6.82 (m, 4H), 5.43 (br, 2H), 3.79 (s, 6H).  $^{13}\text{C NMR}$  (101 MHz,  $\text{CDCl}_3$ )  $\delta$  154.71, 137.22, 135.85, 122.21, 120.40, 118.67, 114.86, 55.77. HRMS (ESI):  $m/z$  calcd. for  $\text{C}_{20}\text{H}_{21}\text{N}_2\text{O}_2$   $[\text{M}+\text{H}]^+$ : 321.1598, found: 321.1584.

**N, N'-bis(4-chlorophenyl)-1,2-benzenediamine (3f):**

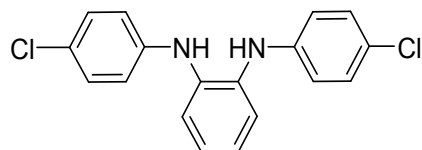

Yellow oil (58.5 mg, 63%).  $^1\text{H NMR}$  (400 MHz,  $\text{CDCl}_3$ )  $\delta$  7.25 – 7.21 (m, 2H), 7.18 (d,  $J = 8.8$  Hz, 4H), 7.01 – 6.97 (m, 2H), 6.83 (d,  $J = 8.8$  Hz, 4H), 5.58 (br, 2H).  $^{13}\text{C NMR}$  (101 MHz,  $\text{CDCl}_3$ )  $\delta$  142.57, 134.70, 129.43, 125.51, 123.67, 120.63, 118.45. HRMS (ESI):  $m/z$  calcd. for  $\text{C}_{18}\text{H}_{15}\text{Cl}_2\text{N}_2$   $[\text{M}+\text{H}]^+$ : 329.0607, found: 329.0588.

**N, N'-bis(4-fluorophenyl)-1,2-benzenediamine (3g)<sup>1</sup>:**

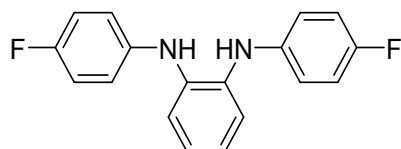

Yellow solid (33.6 mg, 43%).  $\text{Mp} = 88\text{--}90$  °C.  $^1\text{H NMR}$  (400 MHz,  $\text{CDCl}_3$ )  $\delta$  7.18 – 7.12 (m, 2H), 7.00 – 6.91 (m, 6H), 6.91 – 6.83 (m, 4H), 5.52 (br, 2H).  $^{13}\text{C NMR}$  (101 MHz,  $\text{CDCl}_3$ )  $\delta$  157.85 (d,  $J_{\text{C-F}} = 238.1$  Hz), 139.99, 135.31, 123.05, 119.68, 119.41 (d,  $J_{\text{C-F}} = 5.4$  Hz), 116.05 (d,  $J_{\text{C-F}} = 22.4$  Hz). HRMS (ESI):  $m/z$  calcd. for  $\text{C}_{18}\text{H}_{15}\text{F}_2\text{N}_2$   $[\text{M}+\text{H}]^+$ : 297.1198, found: 297.1179.

**N, N'-bis(3-methylphenyl)-1,2-benzenediamine (3h):**



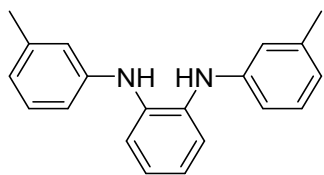

Yellow oil (45.5 mg, 64%). <sup>1</sup>H NMR (400 MHz, CDCl<sub>3</sub>) δ 7.22 – 7.18 (m, 2H), 7.07 – 7.03 (m, 2H), 6.91 – 6.87 (m, 2H), 6.67 – 6.65 (m, 5H), 6.63 (s, 1H), 5.48 (br, 2H), 2.20 (s, 6H). <sup>13</sup>C NMR (101 MHz, CDCl<sub>3</sub>) δ 144.04, 139.35, 135.11, 129.30, 123.01, 121.57, 120.45, 118.02, 114.42, 77.48, 77.16, 76.84, 21.63. HRMS (ESI): m/z calcd. for C<sub>20</sub>H<sub>21</sub>N<sub>2</sub> [M+H]<sup>+</sup>: 289.1699, found: 289.1702.

**N,N'-bis(3-fluorophenyl)-1,2-benzenediamine (3i):**

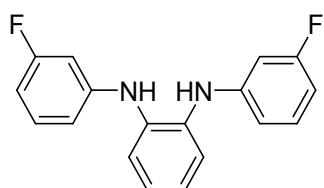

Yellow oil (33.2 mg, 45%). <sup>1</sup>H NMR (400 MHz, CDCl<sub>3</sub>) δ 7.36 – 7.27 (m, 2H), 7.21 – 7.11 (m, 2H), 7.08 – 7.00 (m, 2H), 6.68 – 6.62 (m, 3H), 6.61 – 6.53 (m, 3H), 5.67 (br, 2H). <sup>13</sup>C NMR (101 MHz, CDCl<sub>3</sub>) δ 163.93 (d, *J* = 244.3 Hz), 145.95 (d, *J* = 10.5 Hz), 134.46, 130.64 (d, *J* = 9.9 Hz), 124.07, 121.43, 112.48 (d, *J* = 2.5 Hz), 107.22 (d, *J* = 21.5 Hz), 103.66 (d, *J* = 25.1 Hz). HRMS (ESI): m/z calcd. for C<sub>18</sub>H<sub>15</sub>F<sub>2</sub>N<sub>2</sub> [M+H]<sup>+</sup>: 297.1198, found: 297.1197.

**N,N'-bis(2-ethylphenyl)-1,2-benzenediamine (3j):**

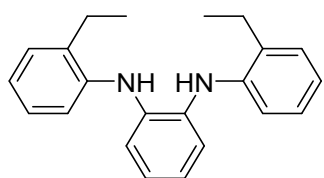

Yellow oil (37.9 mg, 48%). <sup>1</sup>H NMR (400 MHz, CDCl<sub>3</sub>) δ 7.17 (d, *J* = 7.2 Hz, 2H), 7.13 – 7.06 (m, 4H), 6.98 – 6.87 (m, 6H), 5.49 (br, 2H), 2.54 (q, *J* = 7.5 Hz, 4H), 1.17 (t, *J* = 7.5 Hz, 6H). <sup>13</sup>C NMR (101 MHz, CDCl<sub>3</sub>) δ 141.47, 135.31, 132.91, 128.96, 126.90, 122.81, 121.56, 120.35, 117.88, 24.44, 13.81. HRMS (ESI): m/z calcd. for C<sub>22</sub>H<sub>25</sub>N<sub>2</sub> [M+H]<sup>+</sup>: 317.2012, found: 317.2000.

**N,N'-bis(2,3-dimethylphenyl)-1,2-benzenediamine (3k):**

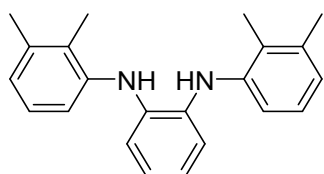

Yellow oil (23.6 mg, 30%). <sup>1</sup>H NMR (400 MHz, CDCl<sub>3</sub>) δ 6.99 (t, *J* = 7.7 Hz, 2H), 6.96 – 6.85 (m, 4H), 6.81 (t, *J* = 5.4 Hz, 4H), 5.41 (br, 2H), 2.29 (s, 6H), 2.10 (s, 6H). <sup>13</sup>C NMR (101 MHz, CDCl<sub>3</sub>) δ

141.95, 137.68, 135.51, 126.65, 126.14, 123.72, 122.36, 119.79, 116.81, 20.77, 13.52. HRMS (ESI):  $m/z$  calcd. for  $C_{22}H_{25}N_2$   $[M+H]^+$ : 317.2012, found: 317.2005.

**N, N'-di-1-naphthalenyl-1,2-benzenediamine (3l)<sup>1</sup>:**

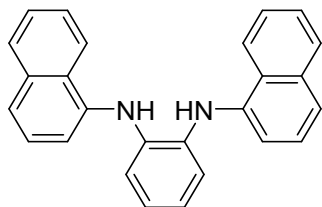

Dark red oil (23.4 mg, 26%). <sup>1</sup>H NMR (400 MHz, CDCl<sub>3</sub>) δ 7.91 (d,  $J$  = 8.3 Hz, 2H), 7.82 (d,  $J$  = 7.6 Hz, 2H), 7.53 – 7.32 (m, 8H), 7.15 – 7.08 (m, 4H), 7.02 – 6.89 (m, 2H), 6.14 (br, 2H). <sup>13</sup>C NMR (101 MHz, CDCl<sub>3</sub>) δ 139.49, 135.41, 134.72, 128.71, 126.70, 126.26, 126.17, 125.71, 123.10, 122.19, 121.50, 120.65, 113.94. HRMS (ESI):  $m/z$  calcd. for  $C_{26}H_{21}N_2$   $[M+H]^+$ : 361.1699, found: 361.1692.

**N, N'-di-2-naphthalenyl -1,2-benzenediamine (3m)<sup>1</sup>:**

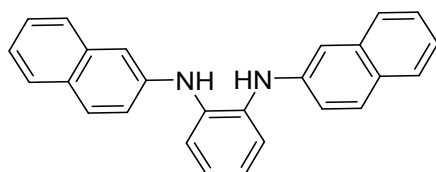

Yellow solid (30.6 mg, 31%). <sup>1</sup>H NMR (400 MHz, CDCl<sub>3</sub>) δ 7.71 (dd,  $J$  = 8.4, 3.9 Hz, 4H), 7.59 (d,  $J$  = 8.2 Hz, 2H), 7.43 – 7.34 (m, 4H), 7.30 – 7.20 (m, 4H), 7.13 (dd,  $J$  = 8.8, 2.3 Hz, 2H), 7.08 – 7.00 (m, 2H), 5.80 (br, 2H). <sup>13</sup>C NMR (101 MHz, CDCl<sub>3</sub>) δ 141.66, 135.05, 134.76, 129.35, 129.14, 127.78, 126.60, 126.54, 123.52, 120.85, 119.76, 111.21. HRMS (ESI):  $m/z$  calcd. for  $C_{26}H_{21}N_2$   $[M+H]^+$ : 361.1699, found: 361.1683.

**N, N'-bis(4-methylphenyl)-4-methyl-1,2-benzenediamine (3n):**

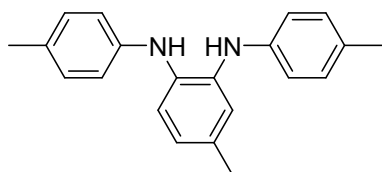

Yellow oil (62.7 mg, 83%). <sup>1</sup>H NMR (400 MHz, CDCl<sub>3</sub>) δ 7.09 – 6.98 (m, 6H), 6.94 – 6.85 (m, 2H), 6.75 (d,  $J$  = 8.3 Hz, 2H), 6.69 (d,  $J$  = 7.8 Hz, 1H), 5.64 (br, 1H), 5.25 (br, 1H), 2.28 (s, 3H), 2.25 (s, 3H), 2.25 (s, 3H). <sup>13</sup>C NMR (101 MHz, CDCl<sub>3</sub>) δ 142.57, 141.04, 137.04, 133.51, 131.10, 130.56, 129.95, 129.92, 122.35, 121.86, 118.70, 118.57, 117.99, 116.75, 21.24, 20.78, 20.67. HRMS (ESI):  $m/z$  calcd. for  $C_{21}H_{23}N_2$   $[M+H]^+$ : 303.1856, found: 303.1856.

**N, N'-bis(4-methylphenyl)-4-ethyl-1,2-benzenediamine (3o):**

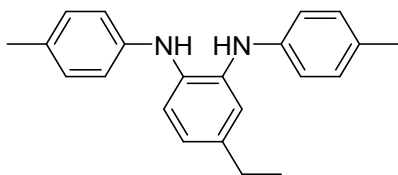

Yellow oil (48.5 mg, 63%).  $^1\text{H}$  NMR (400 MHz,  $\text{CDCl}_3$ )  $\delta$  7.12 (d,  $J = 8.0$  Hz, 1H), 7.09 – 6.99 (m, 5H), 6.88 (d,  $J = 8.3$  Hz, 2H), 6.81 – 6.70 (m, 3H), 5.63 (br, 1H), 5.30 (br, 1H), 2.55 (q,  $J = 7.5$  Hz, 2H), 2.28 (s, 3H), 2.26 (s, 3H), 1.19 (t,  $J = 7.6$  Hz, 3H).  $^{13}\text{C}$  NMR (101 MHz,  $\text{CDCl}_3$ )  $\delta$  142.43, 141.22, 139.82, 136.60, 131.68, 130.38, 129.96, 129.93, 129.54, 121.45, 121.32, 118.37, 117.87, 116.96, 28.64, 20.77, 20.69, 15.88. HRMS (ESI):  $m/z$  calcd. for  $\text{C}_{22}\text{H}_{25}\text{N}_2$   $[\text{M}+\text{H}]^+$ : 317.2012, found: 317.2014.

**N, N'-bis(4-methylphenyl)-4-propyl-1,2-benzenediamine (3p): (40.2 mg, 2 h for  $^{13}\text{C}$  NMR)**

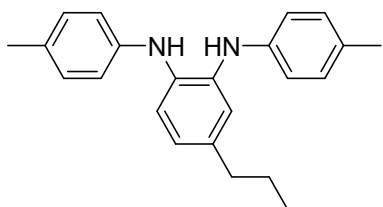

Yellow oil (58.8 mg, 72%).  $^1\text{H}$  NMR (400 MHz,  $\text{CDCl}_3$ )  $\delta$  7.11 (d,  $J = 8.0$  Hz, 1H), 7.08 – 6.99 (m, 5H), 6.87 (d,  $J = 8.3$  Hz, 2H), 6.78 (d,  $J = 8.3$  Hz, 2H), 6.71 (dd, 1H), 5.62 (br, 1H), 5.30 (br, 1H), 2.48 (t, 2H), 2.28 (s, 3H), 2.26 (s, 3H), 1.64 – 1.54 (m, 2H), 0.92 (t,  $J = 7.3$  Hz, 3H).  $^{13}\text{C}$  NMR (101 MHz,  $\text{CDCl}_3$ )  $\delta$  142.41, 141.28, 138.22, 136.41, 131.77, 130.32, 129.96, 129.93, 129.55, 122.02, 121.26, 118.53, 118.30, 116.99, 37.85, 24.83, 20.77, 20.69, 14.01. HRMS (ESI):  $m/z$  calcd. for  $\text{C}_{23}\text{H}_{27}\text{N}_2$   $[\text{M}+\text{H}]^+$ : 331.2169, found: 331.2170.

**N,N'-bis(4-methylphenyl)-4-tert-butyl-1,2-benzenediamine (3q): (45.8 mg, 2.5 h for  $^{13}\text{C}$  NMR)**

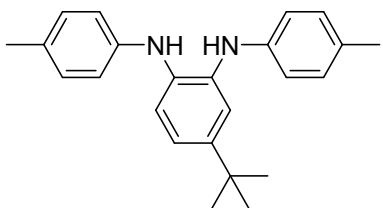

Red oil (68.1 mg, 86%).  $^1\text{H}$  NMR (400 MHz,  $\text{CDCl}_3$ )  $\delta$  7.21 (d,  $J = 2.2$  Hz, 1H), 7.07 (d,  $J = 8.3$  Hz, 1H), 6.95 (t,  $J = 8.3$  Hz, 4H), 6.90 – 6.81 (m, 1H), 6.80 – 6.66 (m, 4H), 5.47 (br, 1H), 5.30 (br, 1H), 2.19 (s, 3H), 2.18 (s, 3H), 1.19 (s, 9H).  $^{13}\text{C}$  NMR (101 MHz,  $\text{CDCl}_3$ )  $\delta$  146.08, 142.00, 141.70, 134.87, 132.56, 129.96, 129.91, 126.18, 119.90, 119.46, 118.25, 117.38, 117.21, 117.03, 31.57, 20.72. HRMS (ESI):  $m/z$  calcd for  $\text{C}_{24}\text{H}_{29}\text{N}_2$   $[\text{M}+\text{H}]^+$ : 345.2325, found: 345.2336.

**N, N'-bis(4-methylphenyl)-4-tert-amyl-1,2-benzenediamine (3r): (50.6 mg, 2.5 h for  $^{13}\text{C}$  NMR)**

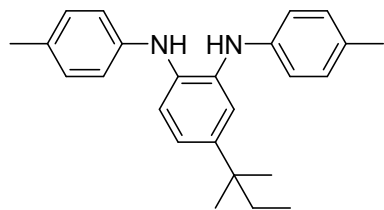

Red oil (57.4 mg, 64%).  $^1\text{H}$  NMR (400 MHz,  $\text{CDCl}_3$ )  $\delta$  7.27 – 7.11 (m, 3H), 7.03 (t,  $J = 7.4$  Hz, 4H), 6.98 – 6.92 (m, 1H), 6.89 – 6.78 (m, 4H), 5.52 (s, 1H), 5.39 (s, 1H), 2.27 (d,  $J = 3.0$  Hz, 6H), 1.61 – 1.54 (m, 2H), 1.22 (s, 6H), 0.70 (t,  $J = 7.4$  Hz, 3H).  $^{13}\text{C}$  NMR (101 MHz,  $\text{CDCl}_3$ )  $\delta$  144.34, 141.99, 141.83, 134.61, 132.65, 129.95, 129.90, 126.85, 120.38, 119.70, 118.23, 117.97, 117.44, 117.17, 37.72, 28.62, 20.72, 9.32. HRMS (ESI):  $m/z$  calcd. for  $\text{C}_{25}\text{H}_{31}\text{N}_2$   $[\text{M}+\text{H}]^+$ : 359.2482, found: 359.2478.

**N, N'-bis(4-methylphenyl)-4-phenyl-1,2-benzenediamine (3s):**

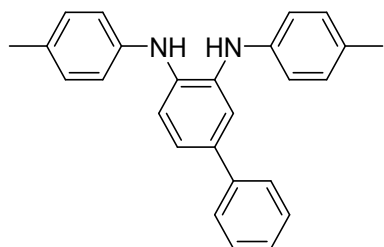

Yellow oil (72.3 mg, 89%).  $^1\text{H}$  NMR (400 MHz,  $\text{CDCl}_3$ )  $\delta$  7.42 (d,  $J = 7.8$  Hz, 2H), 7.38 (s, 1H), 7.28 (t,  $J = 7.6$  Hz, 2H), 7.18 (d,  $J = 8.1$  Hz, 2H), 7.13 – 7.03 (m, 1H), 6.98 (dd,  $J = 7.7, 3.3$  Hz, 4H), 6.85 – 6.75 (m, 4H), 5.45 (br, 2H), 2.20 (s, 6H).  $^{13}\text{C}$  NMR (101 MHz,  $\text{CDCl}_3$ )  $\delta$  141.45, 141.12, 140.94, 135.26, 135.08, 130.43, 130.21, 130.01, 129.97, 128.74, 126.77, 126.68, 121.44, 119.26, 118.50, 118.21, 117.81, 20.74, 20.71. HRMS (ESI):  $m/z$  calcd. for  $\text{C}_{26}\text{H}_{25}\text{N}_2$   $[\text{M}+\text{H}]^+$ : 365.2012, found: 365.2006.

**3,4-bis(*p*-tolylamino)benzonitrile (3t):**

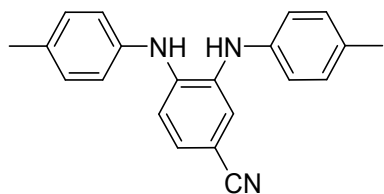

Off-white solid (45.5 mg, 58%). Mp=96-98 °C.  $^1\text{H}$  NMR (400 MHz,  $\text{CDCl}_3$ )  $\delta$  7.28 (d,  $J = 1.8$  Hz, 1H), 7.12 (dd,  $J = 8.4, 1.9$  Hz, 1H), 7.05 (t,  $J = 9.0$  Hz, 3H), 7.00 (d,  $J = 8.1$  Hz, 2H), 6.92 (d,  $J = 8.3$  Hz, 2H), 6.69 (d,  $J = 8.4$  Hz, 2H), 6.14 (br, 1H), 5.13 (br, 1H), 2.25 (s, 3H), 2.22 (s, 3H).  $^{13}\text{C}$  NMR (101 MHz,  $\text{CDCl}_3$ )  $\delta$  139.49, 135.41, 134.72, 128.71, 126.70, 126.26, 126.17, 125.71, 123.10, 122.19, 121.50, 120.65, 113.94. HRMS (ESI):  $m/z$  calcd. for  $\text{C}_{21}\text{H}_{20}\text{N}_3$   $[\text{M}+\text{H}]^+$ : 314.1652, found: 314.1644.

**Ethyl 3, 4-bis(*p*-tolylamino)benzoate (3u):**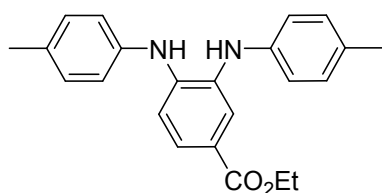

Yellow oil (63.6 mg, 69%). <sup>1</sup>H NMR (400 MHz, CDCl<sub>3</sub>) δ 7.84 (d, *J* = 2.0 Hz, 1H), 7.71 (dd, *J* = 8.6, 2.0 Hz, 1H), 7.16 (d, *J* = 8.6 Hz, 1H), 7.11 (d, *J* = 8.1 Hz, 2H), 7.02 (t, *J* = 8.4 Hz, 4H), 6.70 (d, *J* = 8.4 Hz, 2H), 6.32 (br, 1H), 5.20 (br, 1H), 4.28 (q, *J* = 7.1 Hz, 2H), 2.31 (s, 3H), 2.26 (s, 3H), 1.32 (t, *J* = 7.1 Hz, 3H). <sup>13</sup>C NMR (101 MHz, CDCl<sub>3</sub>) δ 166.59, 144.10, 142.49, 138.41, 132.91, 130.08, 130.04, 129.70, 127.37, 125.67, 121.34, 116.19, 113.00, 60.58, 20.91, 20.64, 14.51. HRMS (ESI): *m/z* calcd. for C<sub>23</sub>H<sub>25</sub>N<sub>2</sub>O<sub>2</sub> [M+H]<sup>+</sup>: 361.1911, found: 361.1906.

**Ethyl 2, 3-bis(*p*-tolylamino)benzoate (3v)<sup>3</sup>:**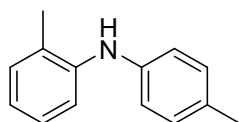

Yellow oil (9.9 mg, 20%). <sup>1</sup>H NMR (400 MHz, CDCl<sub>3</sub>) δ 7.17 (d, *J* = 8.0 Hz, 2H), 7.14 – 7.10 (m, 1H), 7.08 (d, *J* = 8.1 Hz, 2H), 6.92 (d, *J* = 8.4 Hz, 2H), 6.88 (td, *J* = 7.3, 1.2 Hz, 1H), 2.30 (s, 3H), 2.25 (s, 3H). <sup>13</sup>C NMR (101 MHz, CDCl<sub>3</sub>) δ 142.12, 141.07, 130.97, 130.65, 129.97, 127.13, 126.87, 121.22, 118.81, 117.34, 20.80, 18.01. HRMS (ESI): *m/z* calcd. for C<sub>14</sub>H<sub>16</sub>N [M+H]<sup>+</sup>: 198.1277, found: 198.1283.

**N-(*p*-tolyl)naphthalen-2-amine (3w):**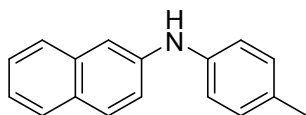

Yellow solid (39.6 mg, 68%). Mp=95-97 °C. <sup>1</sup>H NMR (400 MHz, CDCl<sub>3</sub>) δ 7.71 (d, *J* = 8.6 Hz, 2H), 7.61 (d, *J* = 8.2 Hz, 1H), 7.41 – 7.33 (m, 2H), 7.29 – 7.23 (m, 1H), 7.17 (dd, *J* = 8.8, 2.2 Hz, 1H), 7.11 (q, *J* = 8.4 Hz, 4H), 5.77 (br, 1H), 2.33 (s, 3H). <sup>13</sup>C NMR (101 MHz, CDCl<sub>3</sub>) δ 141.82, 140.20, 134.83, 131.51, 130.08, 129.26, 128.98, 127.75, 126.53, 126.48, 123.29, 119.70, 119.47, 110.36, 20.89. HRMS (ESI): *m/z* calcd. for C<sub>17</sub>H<sub>14</sub>N [M-H]<sup>-</sup>: 232.1132, found: 232.1137.

**N, N'-bis(4-iodophenyl)-1,2-benzenediamine (3x):**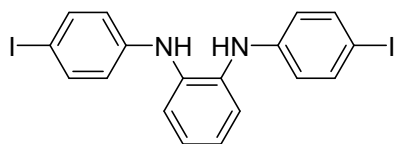

Rufous solid (26.8 mg, 21%). Mp=175-177 °C. <sup>1</sup>H NMR (400 MHz, CDCl<sub>3</sub>) δ 7.48 (d, *J* = 8.8 Hz, 4H), 7.27 – 7.21 (m, 2H), 7.05 – 6.96 (m, 2H), 6.68 (d, *J* = 8.8 Hz, 4H), 5.59 (br, 2H). <sup>13</sup>C NMR

(101 MHz, CDCl<sub>3</sub>)  $\delta$  143.76, 138.24, 134.48, 123.88, 120.93, 119.14, 82.28. HRMS (ESI):  $m/z$  calcd. for C<sub>18</sub>H<sub>12</sub>I<sub>2</sub>N<sub>2</sub> [M-H]<sup>-</sup>: 510.9174, found: 510.9188.

**N,N'-bis(3-bromophenyl)-1,2-benzenediamine (3y):**

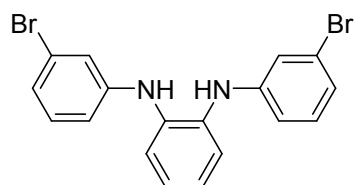

Yellow oil (40.6 mg, 39%). <sup>1</sup>H NMR (400 MHz, CDCl<sub>3</sub>)  $\delta$  7.30 – 7.24 (m, 2H), 7.10 – 6.97 (m, 8H), 6.83 – 6.77 (m, 2H), 5.60 (br, 2H). <sup>13</sup>C NMR (101 MHz, CDCl<sub>3</sub>)  $\delta$  145.49, 134.36, 130.80, 124.15, 123.56, 123.30, 121.39, 119.59, 115.49. HRMS (ESI):  $m/z$  calcd. for C<sub>18</sub>H<sub>12</sub>Br<sub>2</sub>N<sub>2</sub> [M-H]<sup>-</sup>: 414.9451, found: 414.9475.

**2-(4-Methoxyphenylamino)cyclohex-2-en-1-one (C1)<sup>4</sup>:**

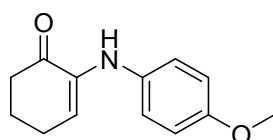

Yellow solid (8.14 mg, 15%). Mp=49-51 °C. <sup>1</sup>H NMR (400 MHz, CDCl<sub>3</sub>)  $\delta$  7.02 – 6.96 (m, 2H), 6.87 – 6.81 (m, 2H), 6.14 (t,  $J$  = 4.8 Hz, 1H), 6.09 (br, 1H), 3.78 (s, 3H), 2.61 – 2.49 (m, 2H), 2.40 (q,  $J$  = 11.1, 2H), 2.05 – 1.91 (m, 2H). <sup>13</sup>C NMR (101 MHz, CDCl<sub>3</sub>)  $\delta$  195.84, 155.06, 137.90, 135.04, 122.36, 114.67, 114.24, 55.68, 37.93, 24.60, 23.27. HRMS (ESI):  $m/z$  calcd. for C<sub>20</sub>H<sub>21</sub>N<sub>2</sub>O<sub>2</sub> [M+H]<sup>+</sup>: 218.1176, found: 218.1170.

**2-((4-Methoxyphenyl)(methyl)amino)cyclohex-2-enone (C2)<sup>4</sup>:**

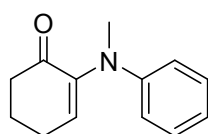

Yellow oil (6.13 mg, 12%). <sup>1</sup>H NMR (400 MHz, CDCl<sub>3</sub>)  $\delta$  7.18 (dd,  $J$  = 8.6, 7.4 Hz, 2H), 6.81 – 6.73 (m, 2H), 6.71 (d,  $J$  = 7.9 Hz, 2H), 3.07 (s, 3H), 2.59 – 2.49 (m, 4H), 2.14 – 2.04 (m, 2H). <sup>13</sup>C NMR (101 MHz, CDCl<sub>3</sub>)  $\delta$  196.62, 149.14, 144.82, 143.20, 129.01, 118.59, 114.94, 77.48, 77.16, 76.84, 39.62, 39.51, 26.13, 23.07. HRMS (ESI):  $m/z$  calcd. for C<sub>13</sub>H<sub>15</sub>NNaO [M+Na]<sup>+</sup>: 224.1046, found: 224.1035.

**Diphenylamine (5a)<sup>5</sup>:**

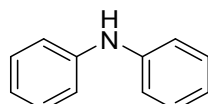

White solid (32.3 mg, 76%). Mp=47-49 °C. <sup>1</sup>H NMR (400 MHz, CDCl<sub>3</sub>)  $\delta$  7.26 (dd,  $J$  = 8.2, 7.6 Hz, 4H), 7.07 (d,  $J$  = 7.6 Hz, 4H), 6.93 (t,  $J$  = 7.3 Hz, 2H), 5.74 (br, 1H). <sup>13</sup>C NMR (101 MHz, CDCl<sub>3</sub>)  $\delta$  143.22, 129.49, 121.14, 117.94. HRMS (ESI):  $m/z$  calcd. for C<sub>12</sub>H<sub>12</sub>N [M+H]<sup>+</sup>: 170.0964, found: 170.0970.

#### 4-methoxy-N-phenylaniline (**5b**)<sup>6</sup>:

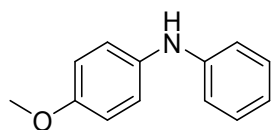

White solid (27.5 mg, 55%). Mp=100-102 °C. <sup>1</sup>H NMR (400 MHz, CDCl<sub>3</sub>) δ 7.24 – 7.17 (m, 2H), 7.07 (d, *J* = 8.7 Hz, 2H), 6.90 (d, *J* = 7.8 Hz, 2H), 6.88 – 6.79 (m, 3H), 5.48 (br, 1H), 3.79 (s, 3H). <sup>13</sup>C NMR (101 MHz, CDCl<sub>3</sub>) δ 155.39, 145.24, 135.80, 129.43, 122.33, 119.71, 115.77, 114.78, 55.70. HRMS (ESI): *m/z* calcd. for C<sub>13</sub>H<sub>14</sub>NO [M+H]<sup>+</sup>: 200.1070, found: 200.1071.

#### 3-nitro-N-phenylaniline (**5c**)<sup>7</sup>:

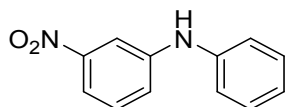

Orange solid (33.2 mg, 62%). Mp=84-86 °C. <sup>1</sup>H NMR (400 MHz, CDCl<sub>3</sub>) δ 7.85 (t, *J* = 2.2 Hz, 1H), 7.69 (ddd, *J* = 8.0, 2.0, 0.8 Hz, 1H), 7.40 – 7.32 (m, 3H), 7.28 (ddd, *J* = 8.2, 2.2, 0.8 Hz, 1H), 7.15 (dd, *J* = 8.5, 0.9 Hz, 2H), 7.08 (t, *J* = 7.4 Hz, 1H), 5.94 (br, 1H). <sup>13</sup>C NMR (101 MHz, CDCl<sub>3</sub>) δ 149.49, 145.20, 141.08, 130.15, 129.85, 123.36, 121.97, 120.01, 114.84, 110.40. HRMS (ESI): *m/z* calcd. for C<sub>12</sub>H<sub>9</sub>N<sub>2</sub>O<sub>2</sub> [M-H]<sup>-</sup>: 213.0670, found: 213.0683.

#### N-phenylnaphthalen-2-amine (**5d**)<sup>8</sup>:

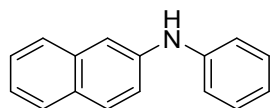

White solid (38.0 mg, 69%). Mp=105-107 °C. <sup>1</sup>H NMR (400 MHz, CDCl<sub>3</sub>) δ 7.74 (d, *J* = 8.8 Hz, 2H), 7.64 (d, *J* = 8.2 Hz, 1H), 7.44 (d, *J* = 2.1 Hz, 1H), 7.42 – 7.37 (m, 1H), 7.34 – 7.27 (m, 3H), 7.22 (dd, *J* = 8.8, 2.3 Hz, 1H), 7.16 (dd, *J* = 8.5, 1.0 Hz, 2H), 6.98 (t, *J* = 7.3 Hz, 1H), 5.83 (br, 1H). <sup>13</sup>C NMR (101 MHz, CDCl<sub>3</sub>) δ 143.03, 140.97, 134.74, 129.57, 129.31, 127.78, 126.61, 126.58, 123.62, 121.54, 120.17, 118.39, 111.68. HRMS (ESI): *m/z* calcd. for C<sub>16</sub>H<sub>14</sub>N [M+H]<sup>+</sup>: 220.1121, found: 220.1112.

#### N-(4-(*tert*-butyl)phenyl)-3-methylaniline (**5e**)<sup>9</sup>:

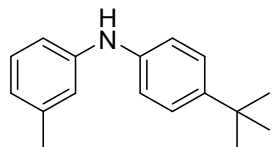

Yellow oil (50 mg, 80%). <sup>1</sup>H NMR (400 MHz, CDCl<sub>3</sub>) δ 7.28 (d, *J* = 8.6 Hz, 2H), 7.12 (t, *J* = 7.6 Hz, 1H), 7.01 (d, *J* = 8.6 Hz, 2H), 6.84 (d, *J* = 7.8 Hz, 2H), 6.70 (d, *J* = 7.3 Hz, 1H), 5.58 (br, 1H), 2.29 (s, 3H), 1.31 (s, 9H). <sup>13</sup>C NMR (101 MHz, CDCl<sub>3</sub>) δ 144.11, 143.75, 140.53, 139.25, 129.25, 126.21, 121.39, 118.20, 117.89, 114.34, 34.28, 31.60, 21.67. HRMS (ESI): *m/z* calcd. for C<sub>17</sub>H<sub>22</sub>N [M+H]<sup>+</sup>: 240.1747, found: 240.1730.

#### N-phenyl-4-(trifluoromethyl)aniline (**5f**)<sup>10</sup>:

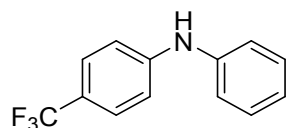

Yellow oil (23.6 mg, 40%).  $^1\text{H}$  NMR (400 MHz,  $\text{CDCl}_3$ )  $\delta$  7.46 (d,  $J = 8.5$  Hz, 2H), 7.32 (t,  $J = 7.9$  Hz, 2H), 7.14 (d,  $J = 8.3$  Hz, 2H), 7.08 – 6.99 (m, 3H), 5.91 (br, 1H).  $^{13}\text{C}$  NMR (101 MHz,  $\text{CDCl}_3$ )  $\delta$  146.89, 141.27, 129.68, 126.83 (q,  $J = 3.8$  Hz), 124.75 (q,  $J = 271.8$  Hz), 121.75 (q,  $J = 32.8$  Hz), 123.06, 120.15, 115.45. HRMS (ESI):  $m/z$  calcd. for  $\text{C}_{13}\text{H}_{11}\text{F}_3\text{N}$   $[\text{M}+\text{H}]^+$ : 238.0838, found: 238.0827.

### 2-fluoro-N-(*m*-tolyl)aniline (5g):

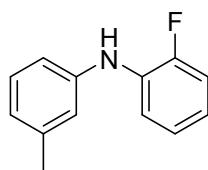

Yellow oil (40.3 mg, 80%).  $^1\text{H}$  NMR (400 MHz,  $\text{CDCl}_3$ )  $\delta$  7.31 (td,  $J = 8.4, 1.5$  Hz, 1H), 7.22 – 7.15 (m, 1H), 7.07 (ddd,  $J = 11.4, 8.1, 1.4$  Hz, 1H), 7.01 (t,  $J = 7.8$  Hz, 1H), 6.95 – 6.90 (m, 2H), 6.86 – 6.77 (m, 2H), 2.32 (s, 3H).  $^{13}\text{C}$  NMR (101 MHz,  $\text{CDCl}_3$ )  $\delta$  153.07 (d,  $J = 241.7$  Hz), 142.05, 139.45, 131.97 (d,  $J = 11.0$  Hz), 129.34, 124.38 (d,  $J = 3.6$ ), 122.83, 120.43 (d,  $J = 7.4$  Hz), 119.52, 117.28 (d,  $J = 2.1$  Hz), 115.86, 115.53 (d,  $J = 19.3$  Hz), 21.64. HRMS (ESI):  $m/z$  calcd. for  $\text{C}_{13}\text{H}_{13}\text{FN}$   $[\text{M}+\text{H}]^+$ : 202.1027, found: 202.1025.

### 3-bromo-N-(*m*-tolyl)aniline (5h):

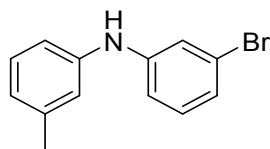

Yellow oil (54.8 mg, 84%).  $^1\text{H}$  NMR (400 MHz,  $\text{CDCl}_3$ )  $\delta$  7.20 – 7.11 (m, 2H), 7.06 (t,  $J = 8.0$  Hz, 1H), 6.98 (d,  $J = 8.0$  Hz, 1H), 6.92 – 6.84 (m, 3H), 6.80 (d,  $J = 7.5$  Hz, 1H), 5.59 (br, 1H), 2.30 (s, 3H).  $^{13}\text{C}$  NMR (101 MHz,  $\text{CDCl}_3$ )  $\delta$  145.17, 141.91, 139.50, 130.68, 129.39, 123.30, 123.19, 123.11, 119.83, 119.64, 116.15, 115.58, 21.61. HRMS (ESI):  $m/z$  calcd. for  $\text{C}_{13}\text{H}_{13}\text{BrN}$   $[\text{M}+\text{H}]^+$ : 262.0226, found: 262.0220.

### di-*m*-tolylamine (5i)<sup>11</sup>:

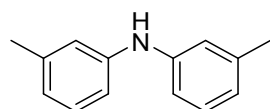

Yellow oil (43.4 mg, 88%).  $^1\text{H}$  NMR (400 MHz,  $\text{CDCl}_3$ )  $\delta$  7.14 (t,  $J = 8.1$  Hz, 2H), 6.90 – 6.85 (m, 4H), 6.74 (d,  $J = 7.7$  Hz, 2H), 2.30 (s, 6H).  $^{13}\text{C}$  NMR (101 MHz,  $\text{CDCl}_3$ )  $\delta$  143.29, 139.31, 129.26, 121.87, 118.66, 115.03, 21.65. HRMS (ESI):  $m/z$  calcd. for  $\text{C}_{14}\text{H}_{16}\text{N}$   $[\text{M}+\text{H}]^+$ : 198.1277, found: 198.1279.

### bis(4-(*tert*-butyl)phenyl)amine (5j)<sup>12</sup>:



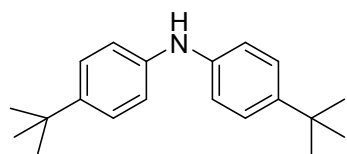

Red solid (18.0 mg, 64%). Mp=106-108 °C. <sup>1</sup>H NMR (400 MHz, CDCl<sub>3</sub>) δ 7.27 (d, *J* = 8.7 Hz, 4H), 7.00 (d, *J* = 8.7 Hz, 4H), 5.58 (br, 1H), 1.31 (s, 18H). <sup>13</sup>C NMR (101 MHz, CDCl<sub>3</sub>) δ 143.69, 141.06, 126.21, 117.52, 34.26, 31.63. HRMS (ESI): *m/z* calcd. for C<sub>20</sub>H<sub>28</sub>N [M+H]<sup>+</sup>: 282.2216, found: 282.2212.

### N-(*p*-tolyl)-[1,1'-biphenyl]-4-amine (5k)<sup>13</sup>:

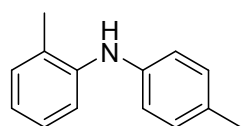

White solid (33.5 mg, 52%). Mp=129-131 °C. <sup>1</sup>H NMR (400 MHz, CDCl<sub>3</sub>) δ 7.54 (dd, *J* = 8.2, 1.0 Hz, 2H), 7.47 (d, *J* = 8.6 Hz, 2H), 7.39 (t, *J* = 7.7 Hz, 2H), 7.27 (t, *J* = 7.4 Hz, 1H), 7.12 – 6.98 (m, 6H), 5.63 (br, 1H), 2.30 (s, 3H). <sup>13</sup>C NMR (101 MHz, CDCl<sub>3</sub>) δ 143.42, 141.00, 140.05, 133.16, 131.31, 130.03, 128.83, 128.05, 126.58, 119.27, 117.00, 77.48, 77.16, 76.84, 20.84. HRMS (ESI): *m/z* calcd. for C<sub>19</sub>H<sub>18</sub>N [M+H]<sup>+</sup>: 260.1434, found: 260.1439.

### N-phenyl-[1,1'-biphenyl]-3-amine (5l)<sup>14</sup>:

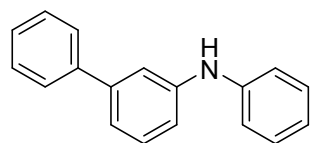

Off-white solid ( 49.6 mg, 81%). Mp=89-91 °C. <sup>1</sup>H NMR (400 MHz, CDCl<sub>3</sub>) δ 7.57 (d, *J* = 7.2 Hz, 2H), 7.42 (t, *J* = 7.5 Hz, 2H), 7.36 – 7.24 (m, 5H), 7.18 – 7.10 (m, 3H), 7.06 (ddd, *J* = 8.0, 2.2, 0.8 Hz, 1H), 6.95 (t, *J* = 7.3 Hz, 1H). <sup>13</sup>C NMR (101 MHz, CDCl<sub>3</sub>) δ 143.65, 143.07, 142.67, 141.27, 129.87, 129.55, 128.85, 127.50, 127.27, 121.35, 120.12, 118.19, 116.74, 116.58. HRMS (ESI): *m/z* calcd. for C<sub>18</sub>H<sub>16</sub>N [M+H]<sup>+</sup>: 246.1277, found: 246.1268.

### Reference

1. Wang, H.; Xia, Y.; Lv, S.; Xu, J.; Sun, Z., Facial and practical synthesis of benzimidazole-based N-heterocyclic carbenes. *Tetrahedron Lett.* **2013**, *54*, 2124-2127.
2. Gampe, D. M.; Schramm, S.; Ziemann, S.; Westerhausen, M.; Görls, H.; Naumov, P.; Beckert, R., From Highly Fluorescent Donors to Strongly Absorbing Acceptors: The Tunable Properties of Fluorubines. *J. Org. Chem.* **2017**, *82*, 6153-6162.
3. Zhang, Z.-M.; Gao, Y.-J.; Lu, J.-M., Synthesis of N-heterocyclic carbene-Pd(II) complexes and their catalytic activity in the Buchwald-Hartwig amination of aryl chlorides. *Tetrahedron* **2017**, *73*, 7308-7314.
4. Yi - Jin, L.; Lu, Z.; Na, Y.; Xiang - He, M.; Yu - Long, Z., Acid/Base - Co - catalyzed Direct Oxidative α - Amination of Cyclic Ketones: Using Molecular Oxygen as the Oxidant. *Adv. Synth. Catal.* **2018**, *360*, 455-461.
5. Girard, S. A.; Hu, X.; Knauber, T.; Zhou, F.; Simon, M.-O.; Deng, G.-J.; Li, C.-J., Pd-Catalyzed Synthesis of Aryl Amines via Oxidative Aromatization of Cyclic Ketones and Amines with Molecular

Oxygen. *Org. Lett.* **2012**, *14*, 5606-5609.

6. Xie, Y.; Liu, S.; Liu, Y.; Wen, Y.; Deng, G.-J., Palladium-Catalyzed One-Pot Diarylamine Formation from Nitroarenes and Cyclohexanones. *Org. Lett.* **2012**, *14*, 1692-1695.
7. Raghuvanshi, D. S.; Gupta, A. K.; Singh, K. N., Nickel-Mediated N-Arylation with Arylboronic Acids: An Avenue to Chan–Lam Coupling. *Org. Lett.* **2012**, *14*, 4326-4329.
8. Mishra, A. K.; Verma, A.; Biswas, S., Nucleophilic ipso-Substitution of Aryl Methyl Ethers through Aryl C–OMe Bond Cleavage; Access to Functionalized Bisthiophenes. *J. Org. Chem.* **2017**, *82*, 3403-3410.
9. Zhao, Y.; Huang, B.; Yang, C.; Li, B.; Gou, B.; Xia, W., Photocatalytic Cross-Dehydrogenative Amination Reactions between Phenols and Diarylamines. *ACS Catalysis* **2017**, *7*, 2446-2451.
10. Liang, T.; Tan, Z.; Zhao, H.; Chen, X.; Jiang, H.; Zhang, M., Aerobic Copper-Catalyzed Synthesis of Benzimidazoles from Diaryl- and Alkylamines via Tandem Triple C–H Aminations. *ACS Catalysis* **2018**, *8*, 2242-2246.
11. Liu, Y.; Yuan, J.; Wang, Z.-F.; Zeng, S.-H.; Gao, M.-Y.; Ruan, M.-L.; Chen, J.; Yu, G.-A., Application of a 2-aryl indenylphosphine ligand in the Buchwald-Hartwig cross-coupling reactions of aryl and heteroaryl chlorides under the solvent-free and aqueous conditions. *Org. Biomol. Chem.* **2017**, *15*, 5805-5810.
12. Rajca, A.; Vale, M.; Rajca, S., Diarylnitroxide Diradicals: Low-Temperature Oxidation of Diarylamines to Nitroxides. *J. Am. Chem. Soc.* **2008**, *130*, 9099-9105.
13. Hajra, A.; Wei, Y.; Yoshikai, N., Palladium-Catalyzed Aerobic Dehydrogenative Aromatization of Cyclohexanone Imines to Arylamines. *Org. Lett.* **2012**, *14*, 5488-5491.
14. Ilies, L.; Matsubara, T.; Nakamura, E., Nickel-Catalyzed Synthesis of Diarylamines via Oxidatively Induced C–N Bond Formation at Room Temperature. *Org. Lett.* **2012**, *14*, 5570-5573.

### 3. $^1\text{H}$ NMR and $^{13}\text{C}$ NMR spectra

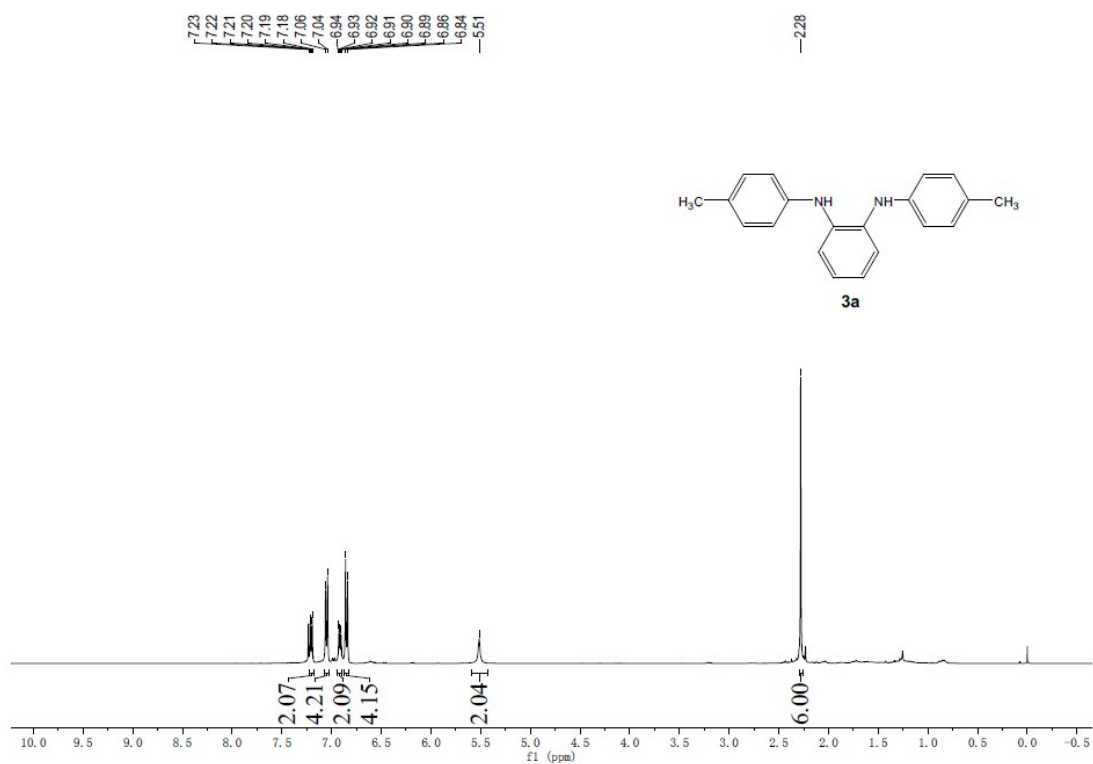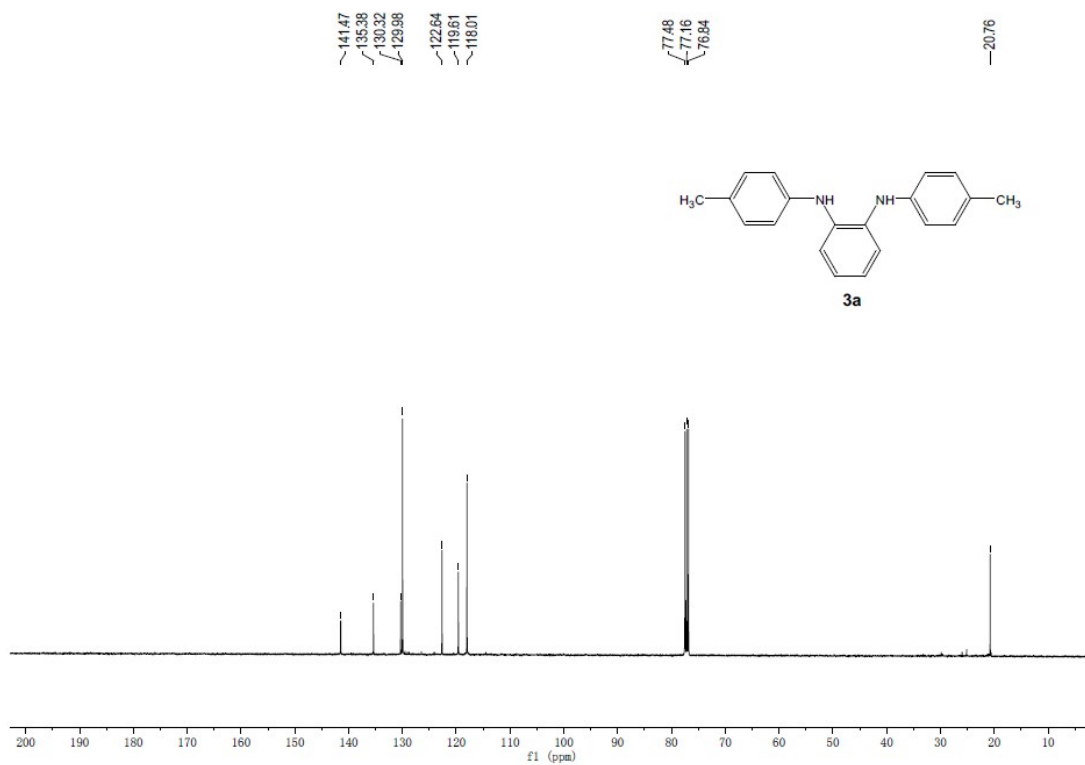

7.22  
7.21  
7.20  
7.20  
7.19  
7.17  
7.17  
7.16  
7.15  
7.15  
7.13  
7.12  
6.90  
6.90  
6.89  
6.89  
6.88  
6.87  
6.85  
6.85  
6.83  
6.83  
6.81  
6.81  
6.79  
6.79  
5.52

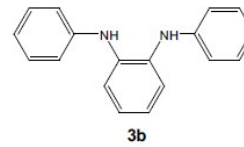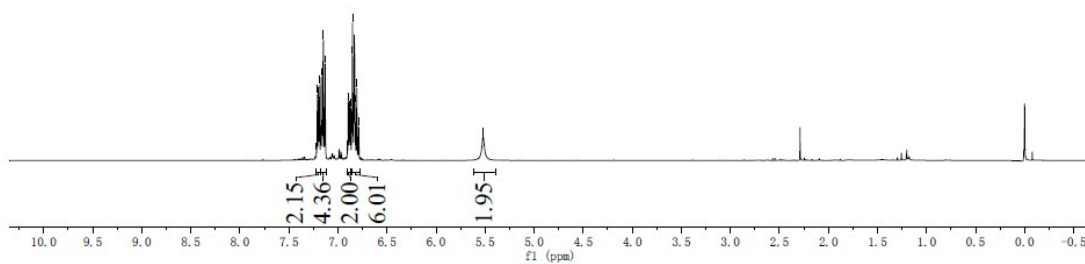

144.02  
135.01  
129.46  
123.11  
120.70  
120.33  
117.33  
77.48  
77.16  
76.84

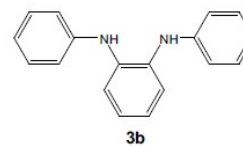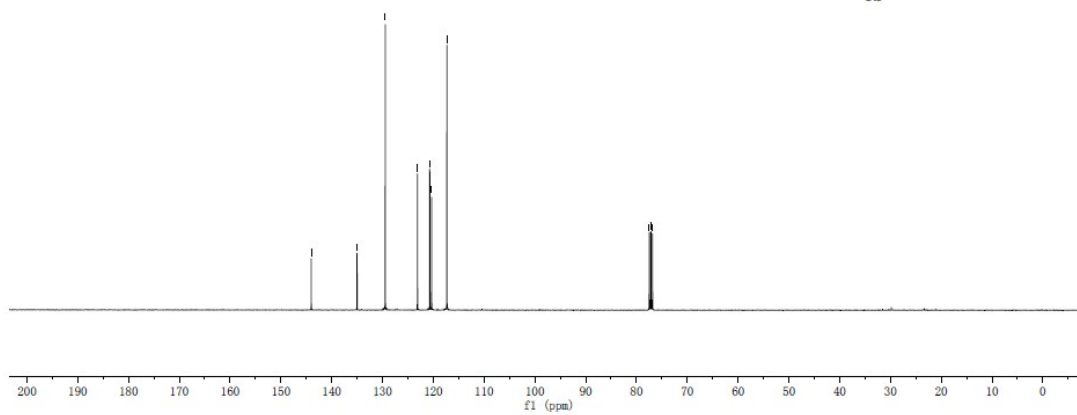

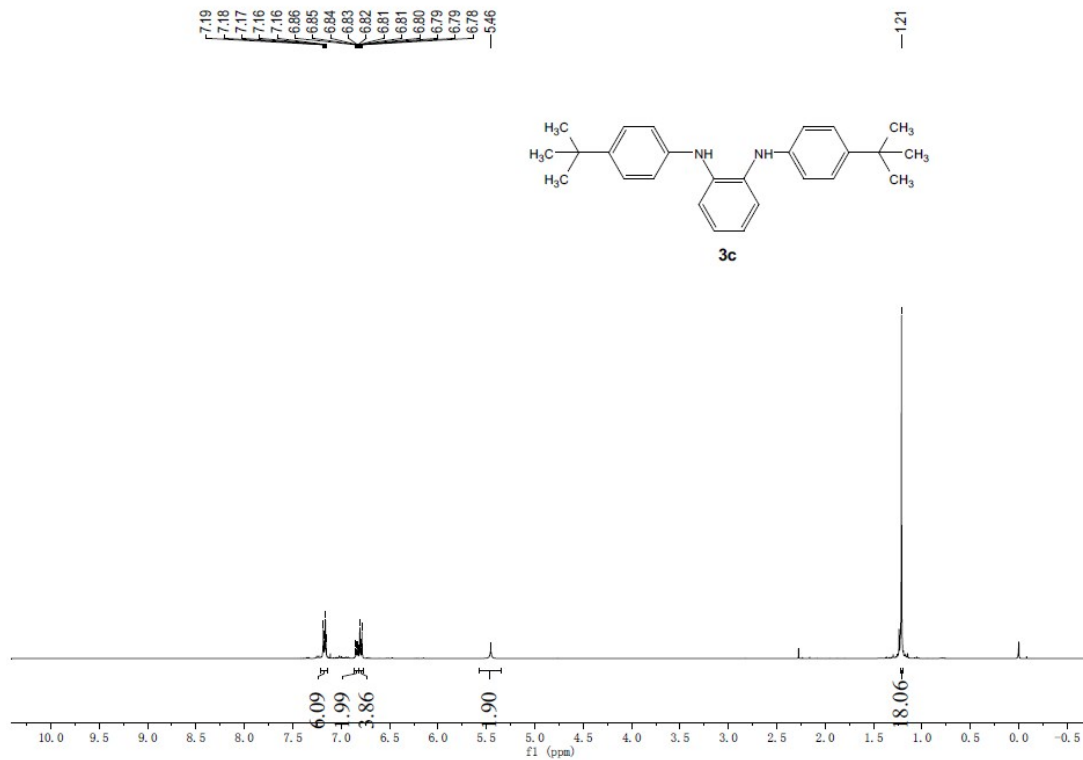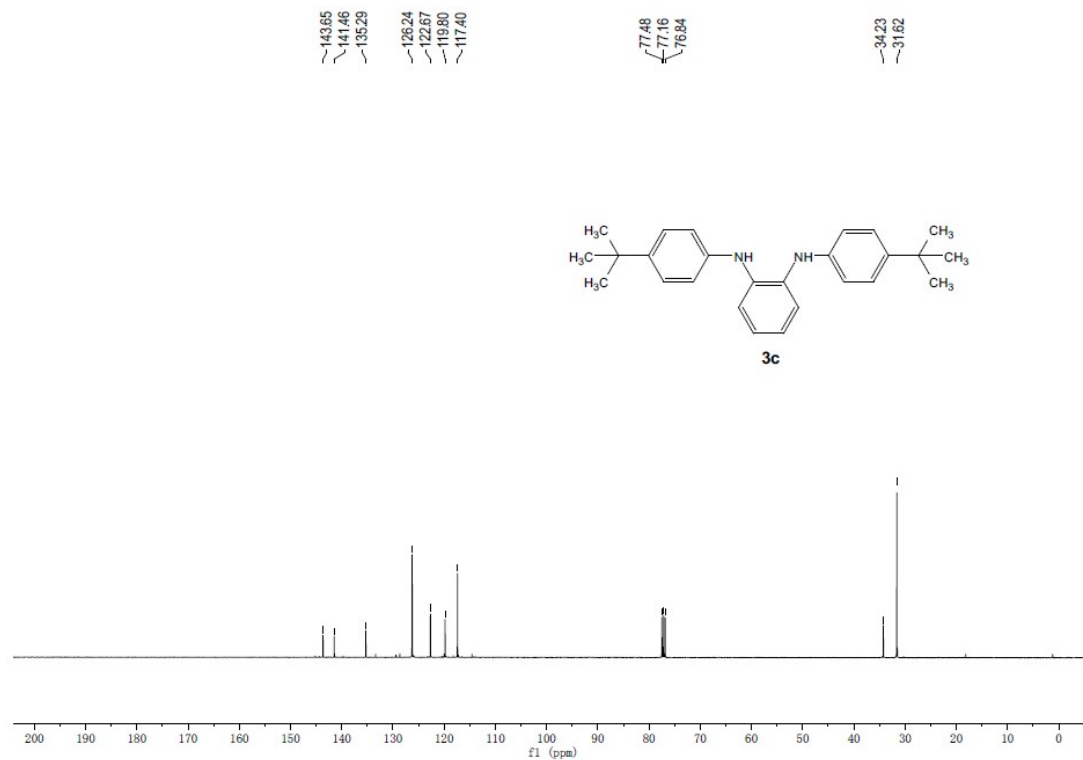

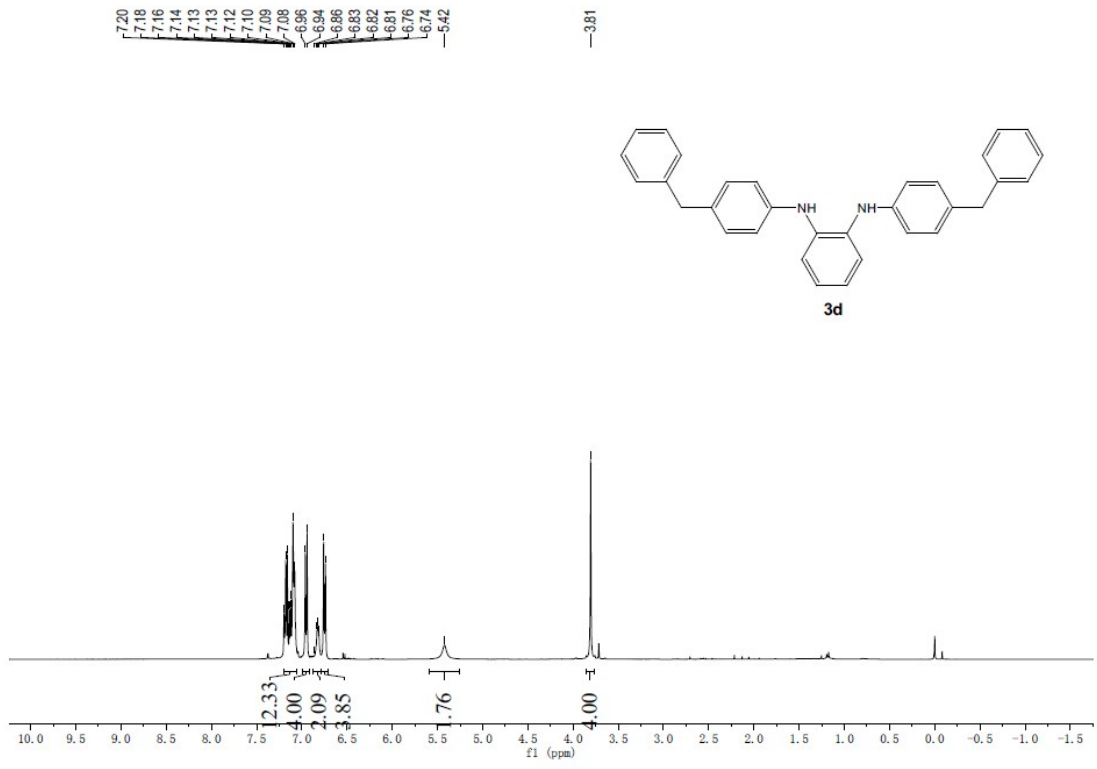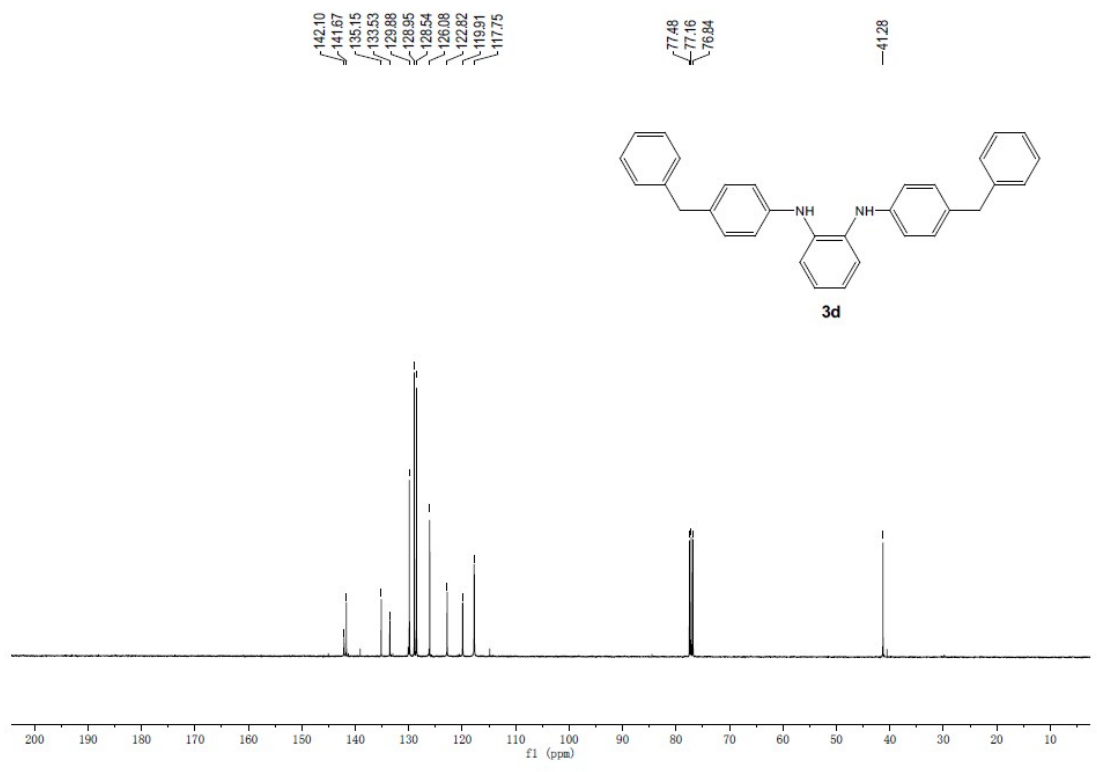

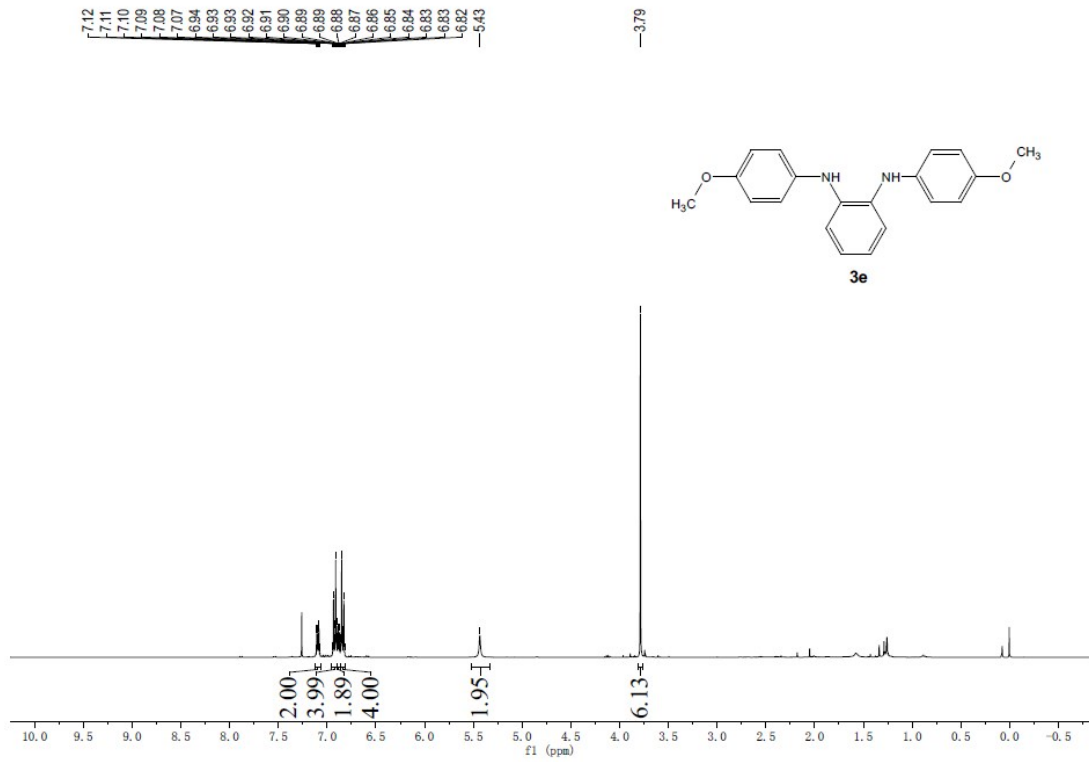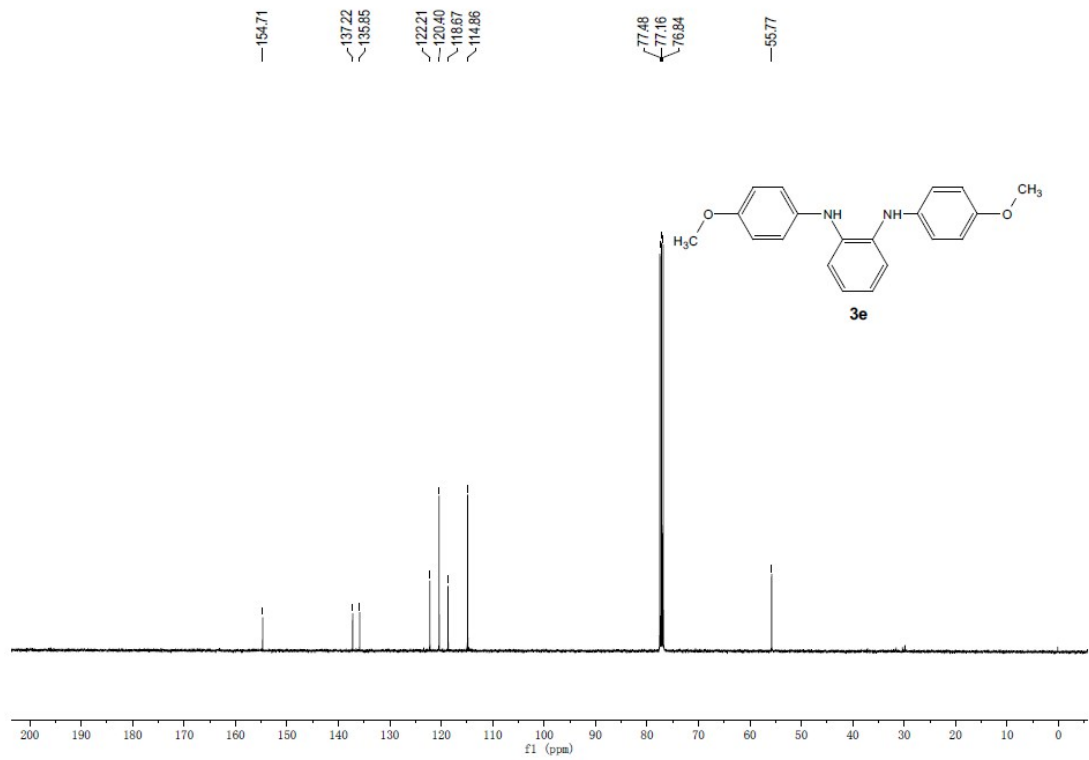

7.25  
7.24  
7.23  
7.22  
7.21  
7.19  
7.17  
7.01  
7.00  
6.99  
6.98  
6.97  
6.85  
6.82  
5.58

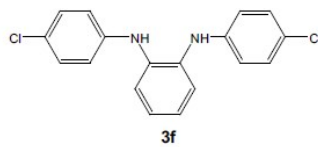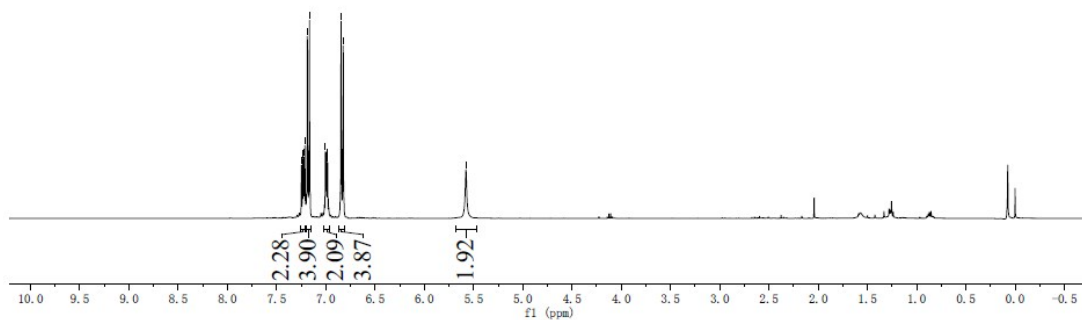

142.57  
134.70  
129.43  
125.51  
123.67  
120.63  
118.45

77.48  
77.16  
76.84

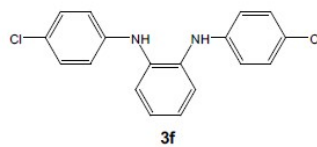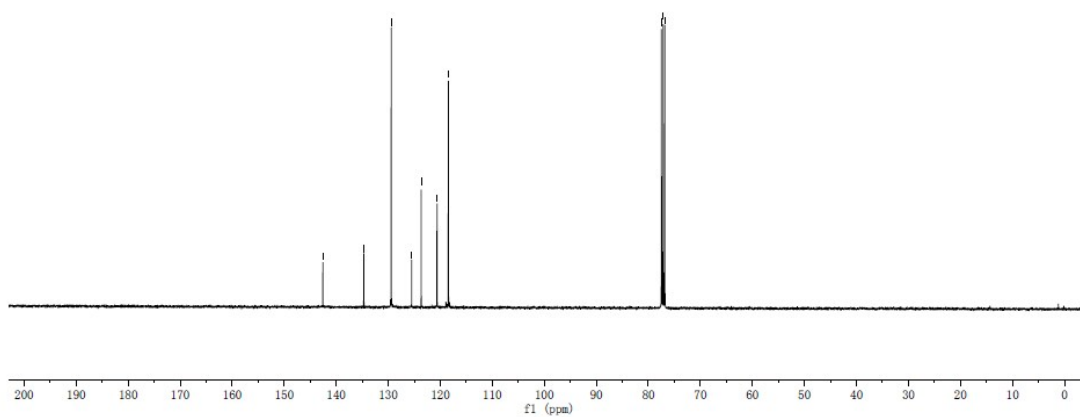



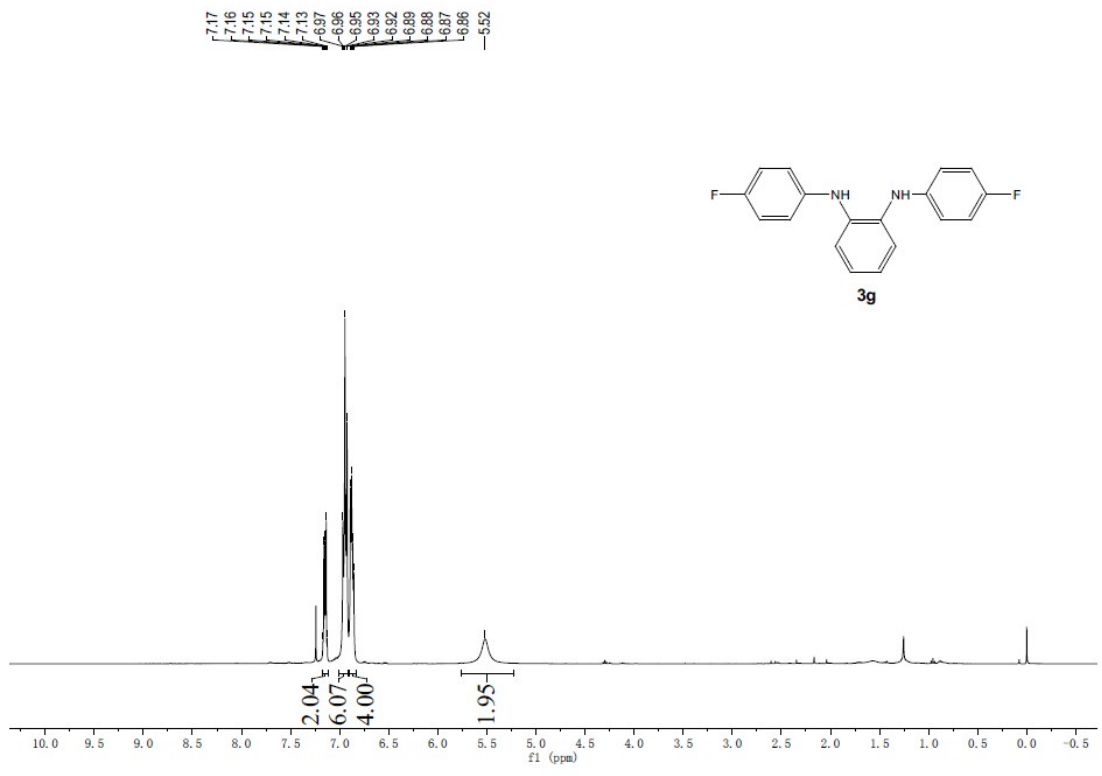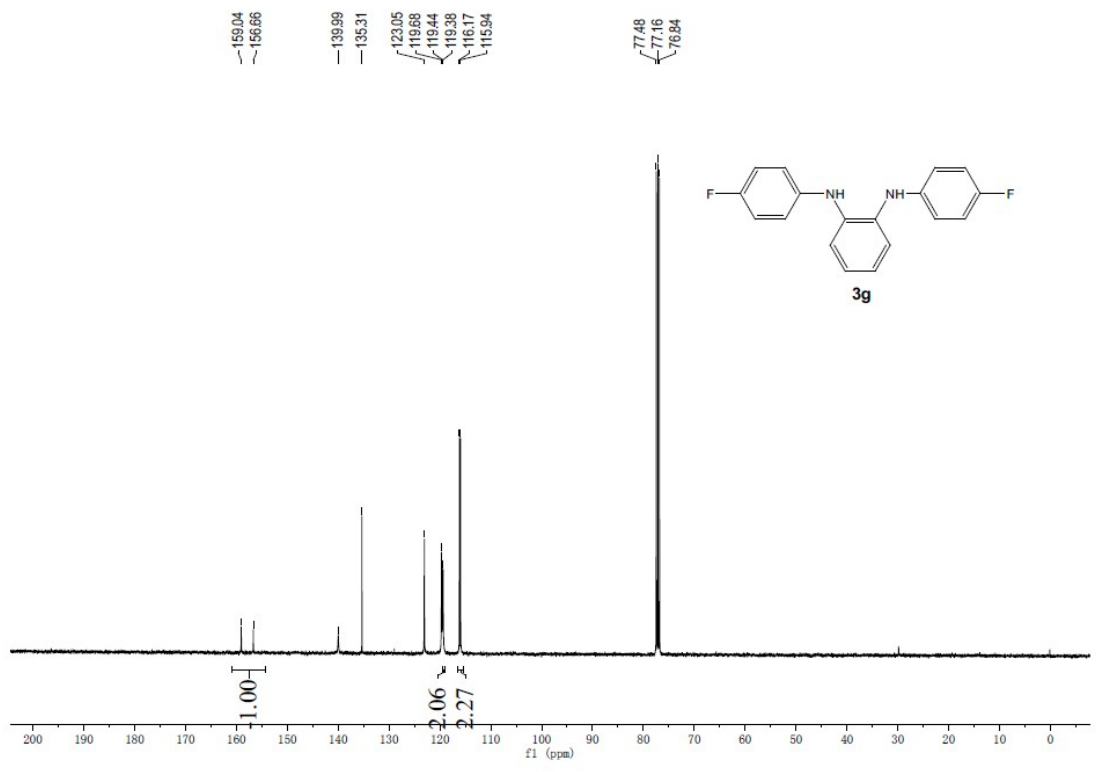

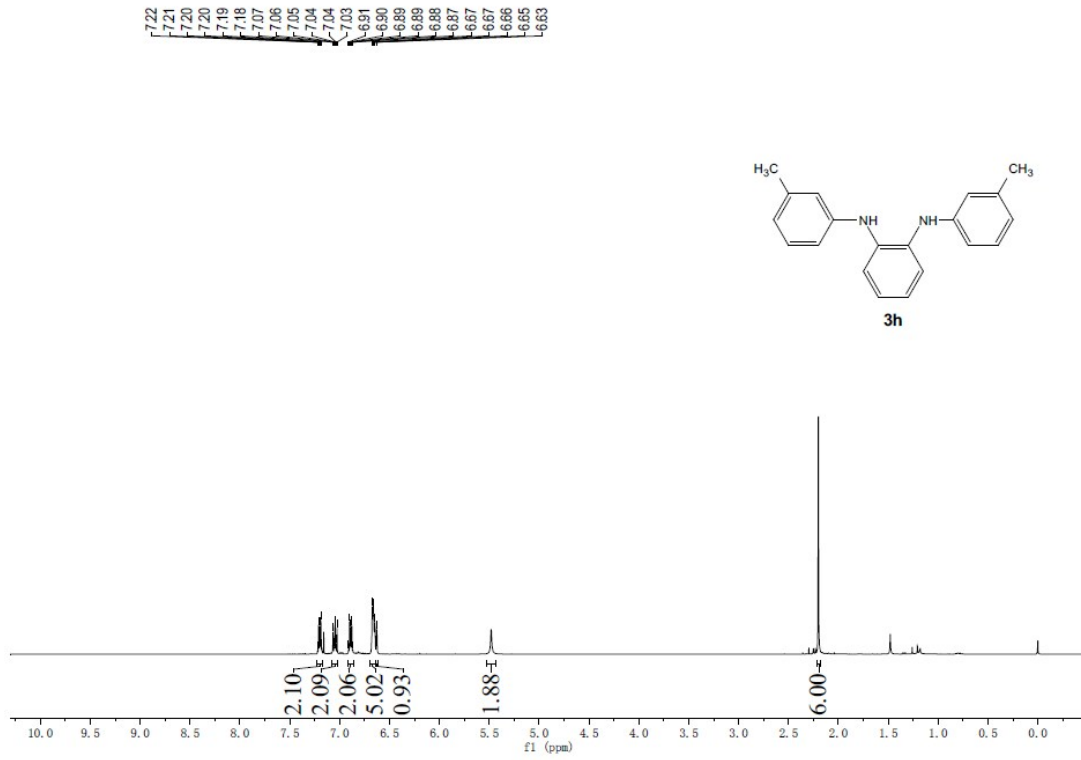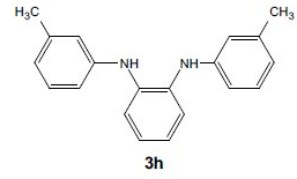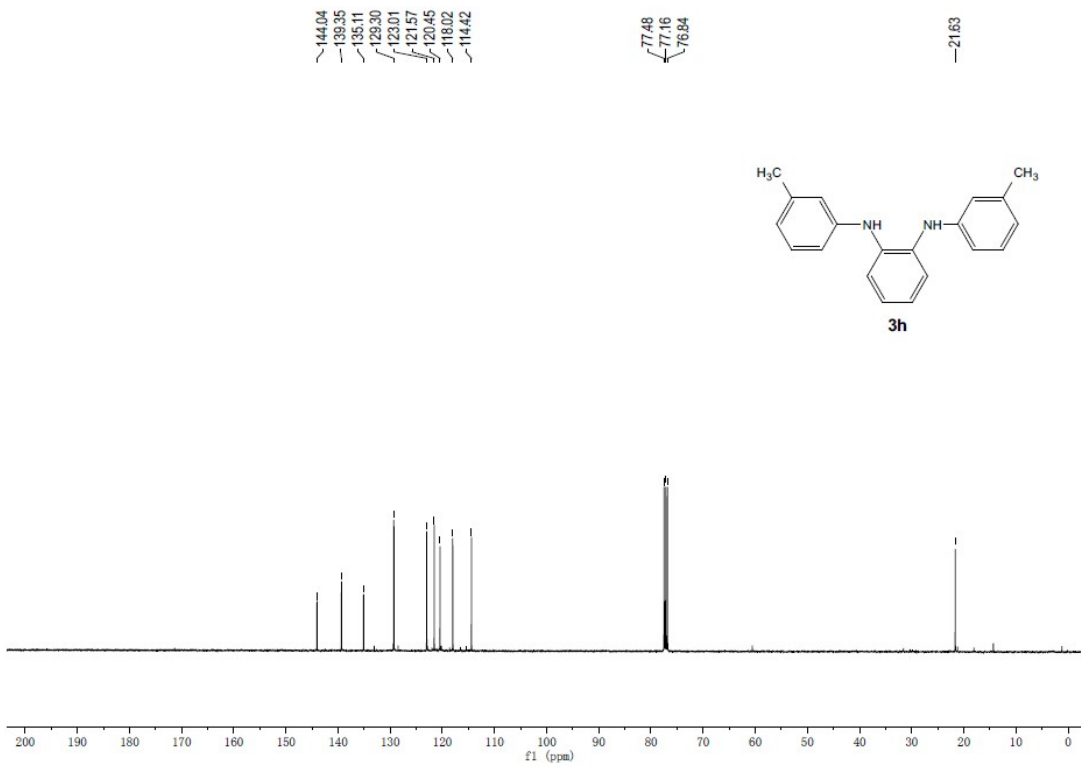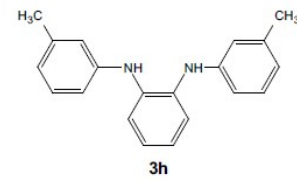

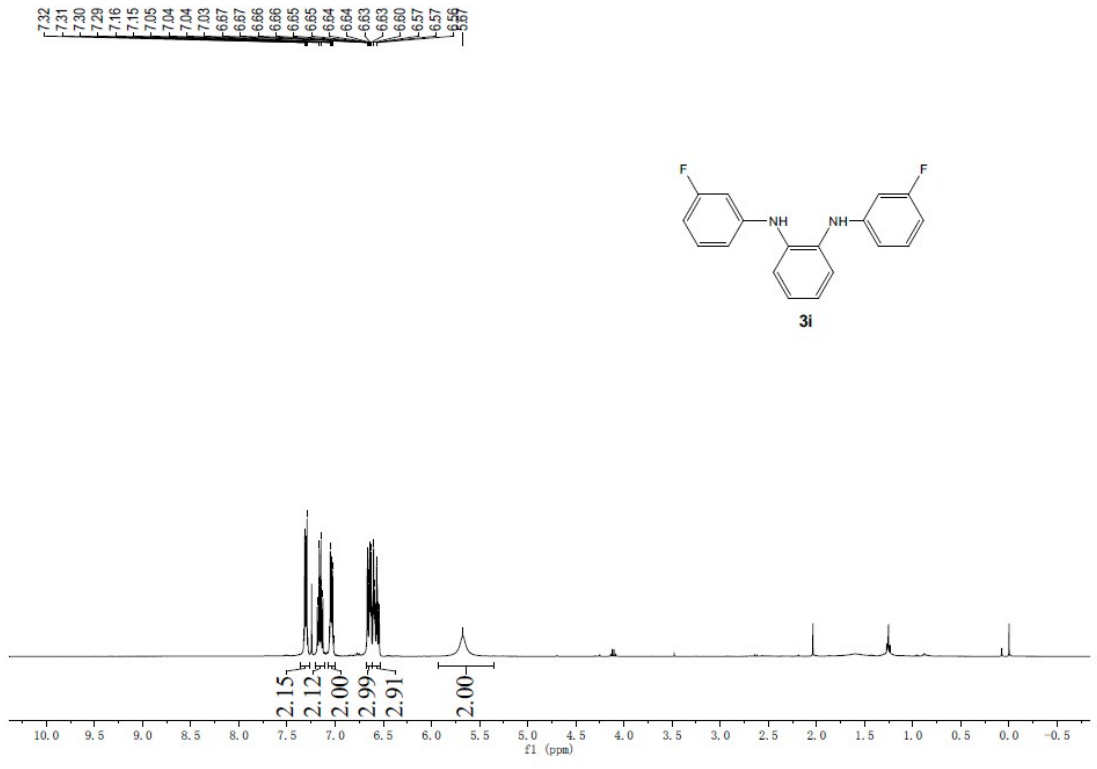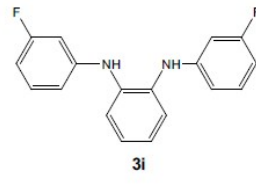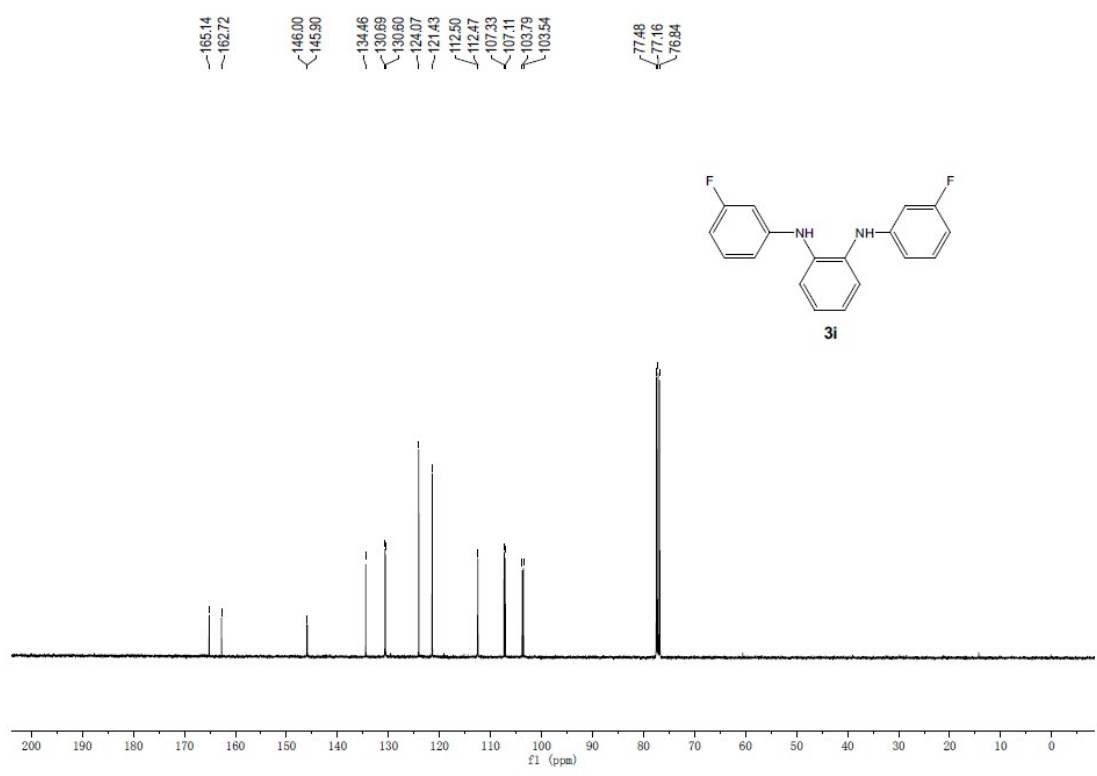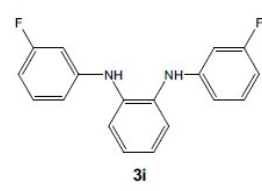

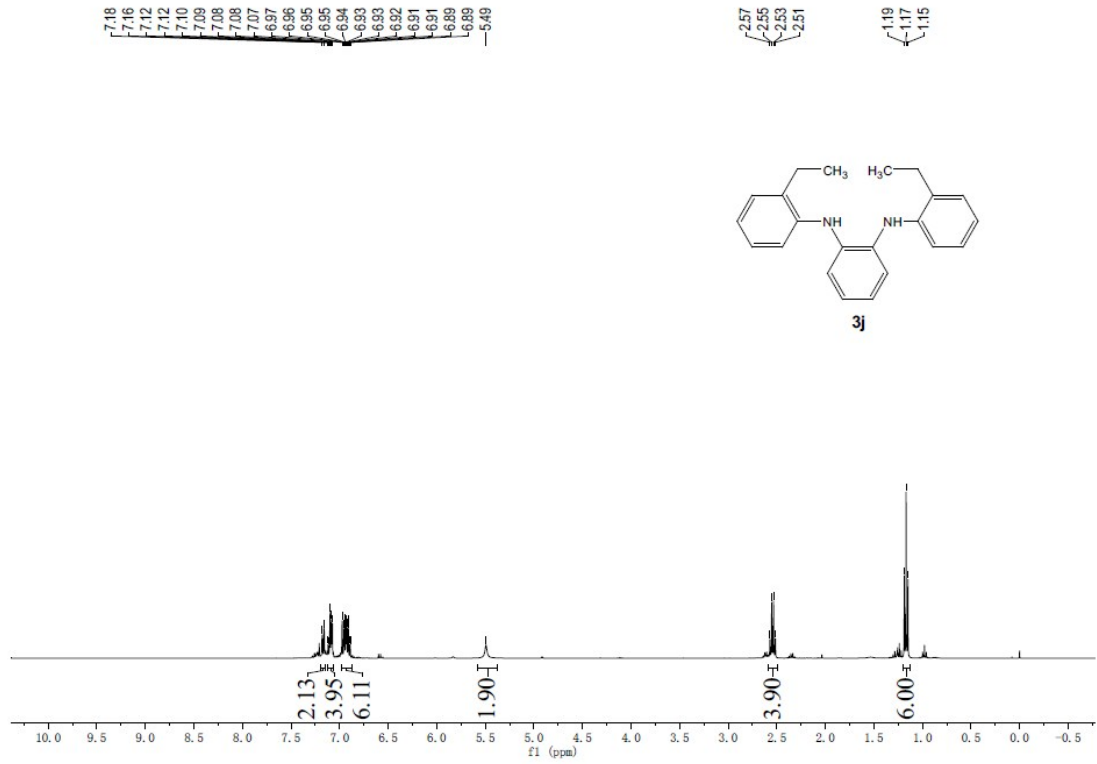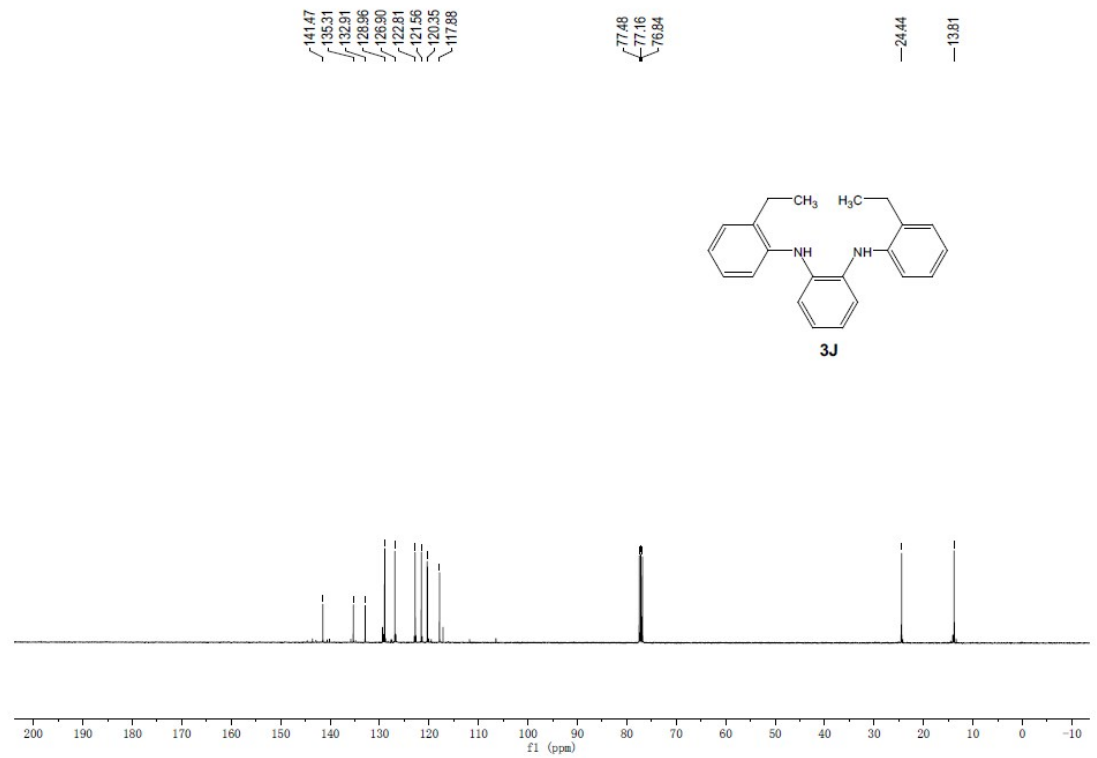

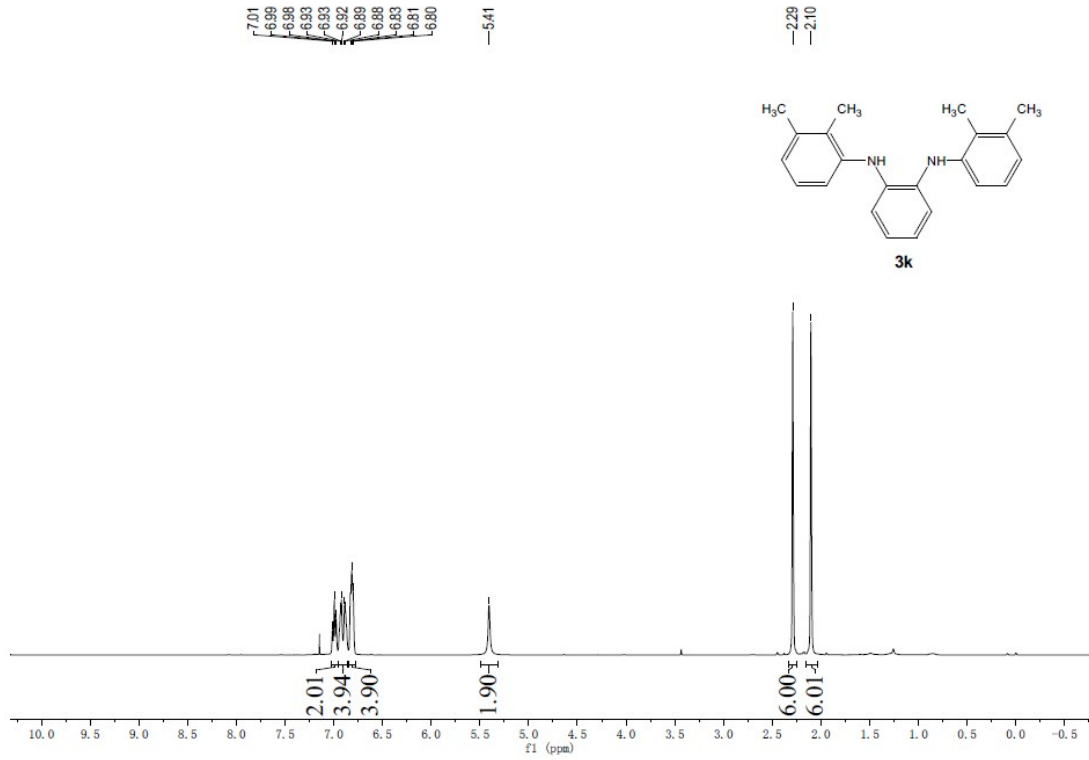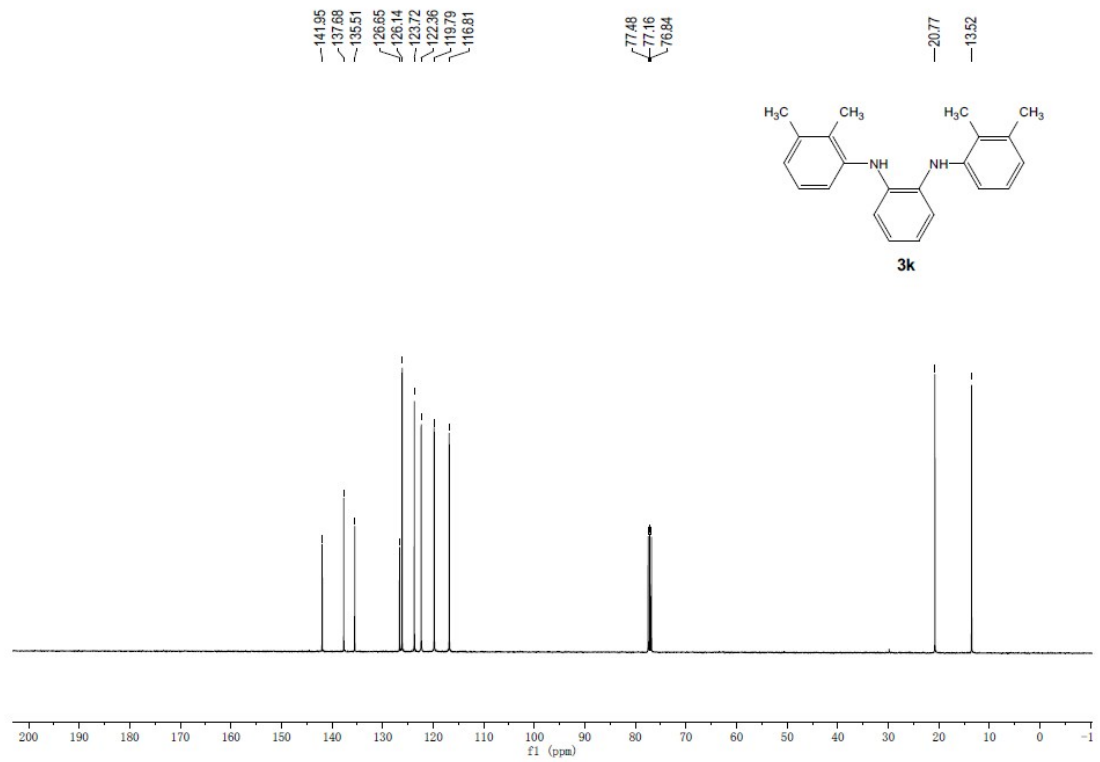

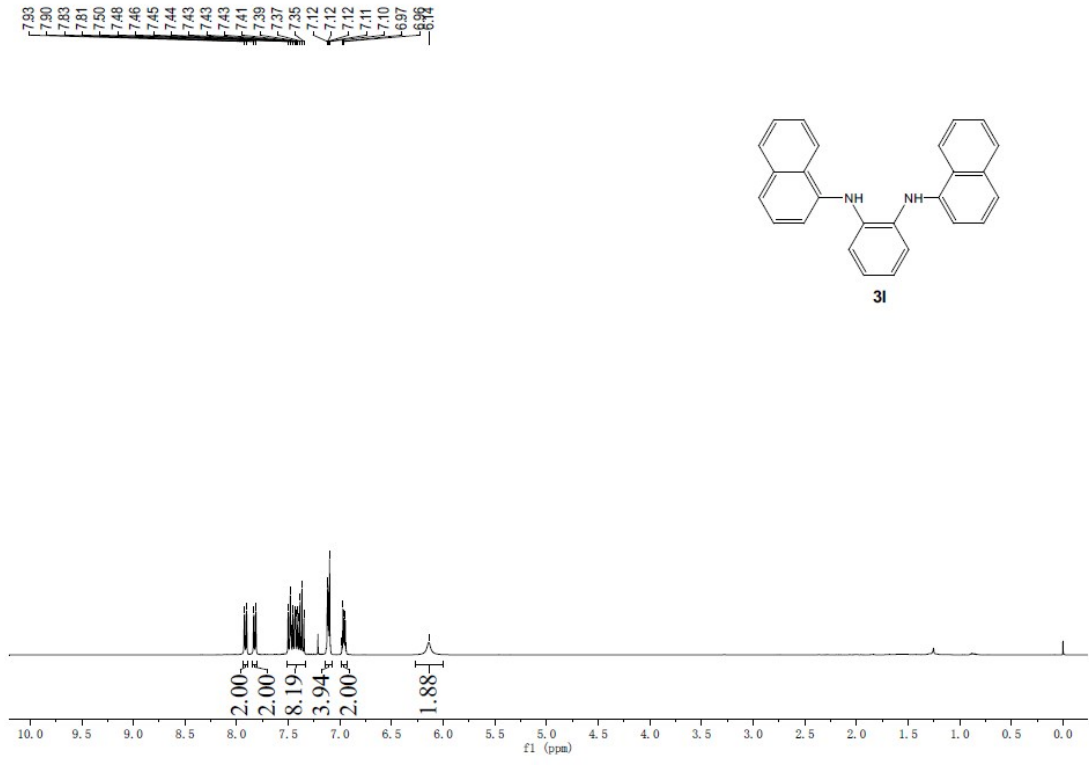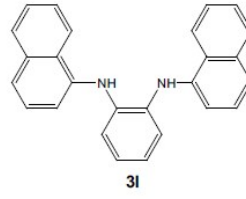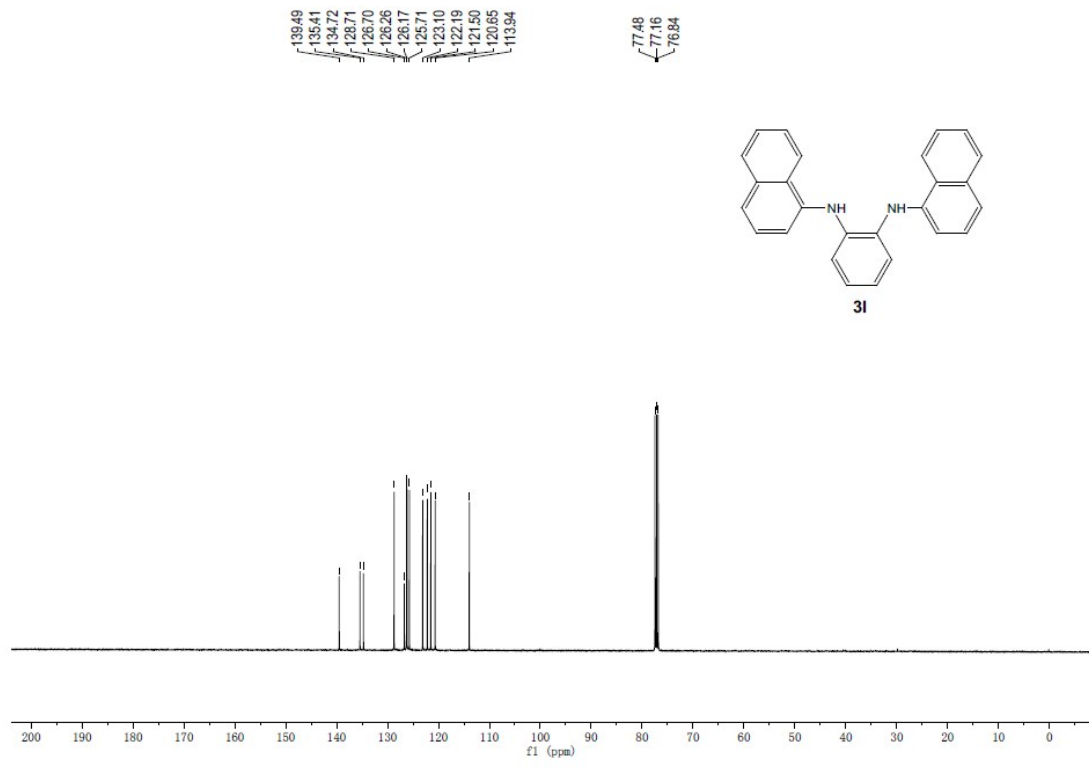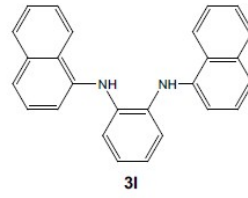

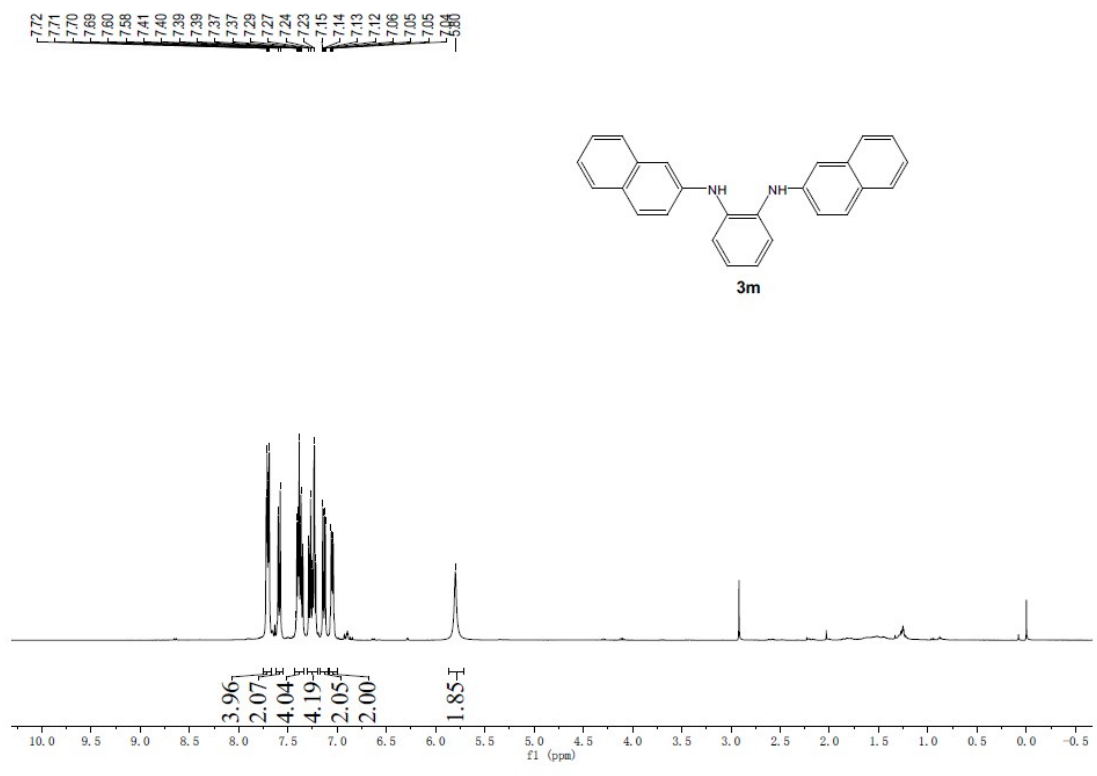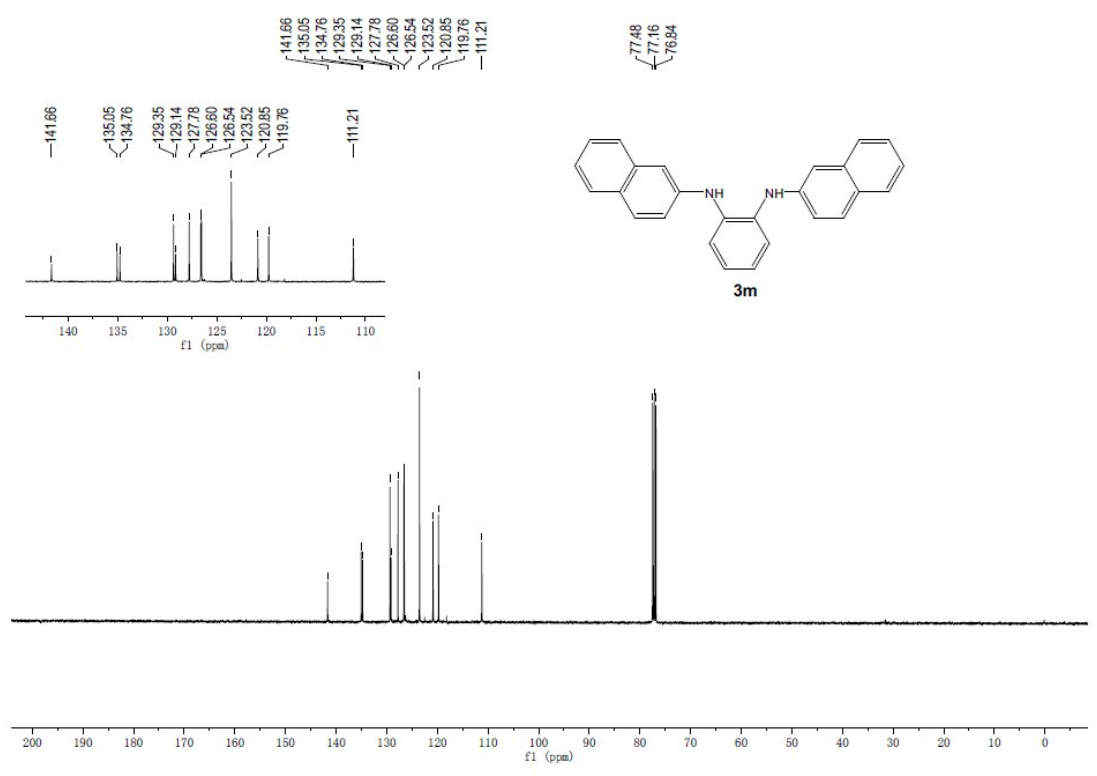

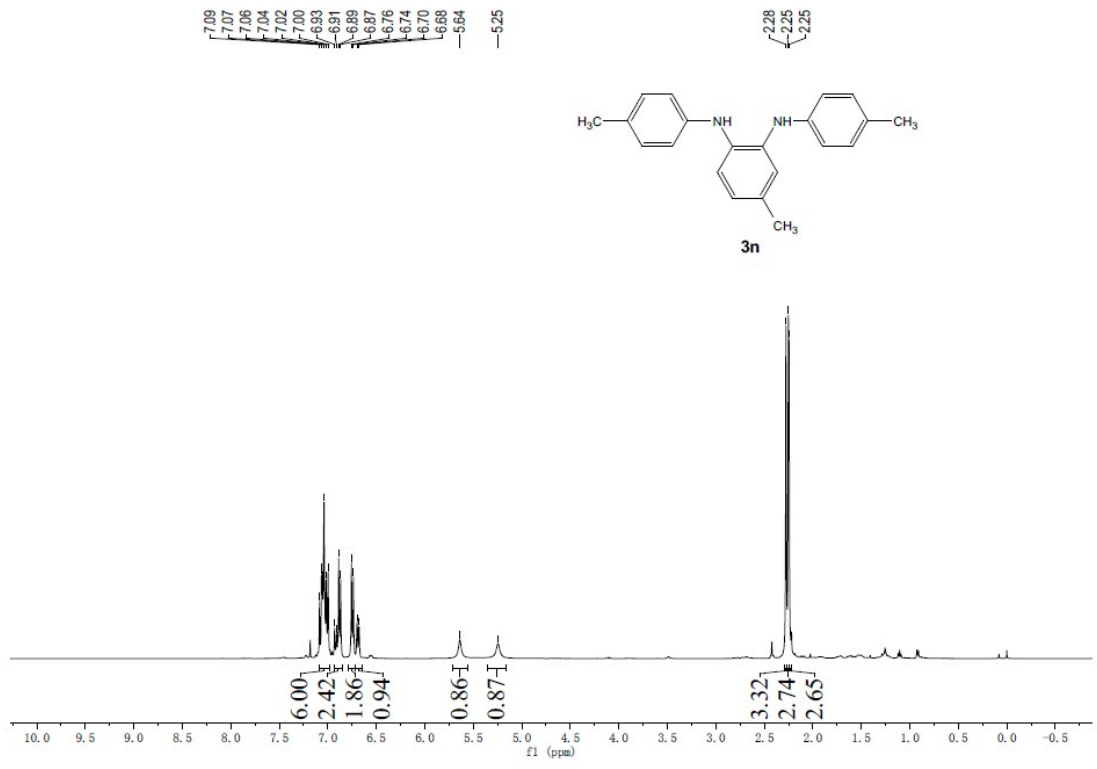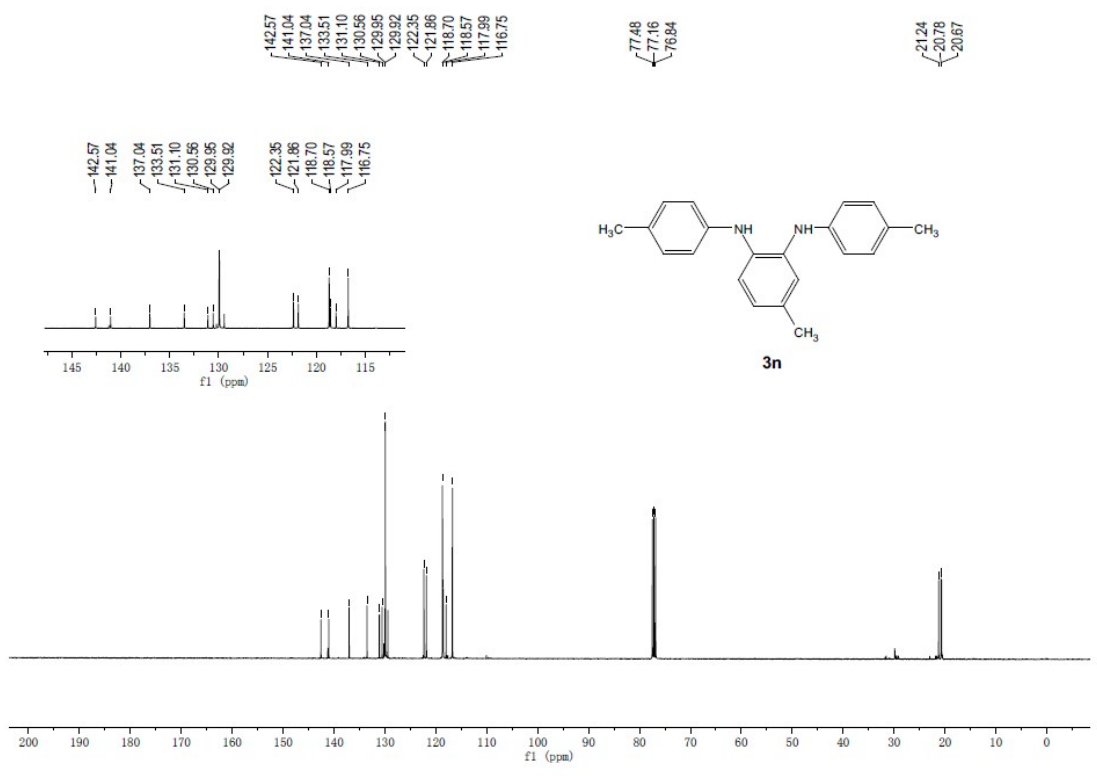



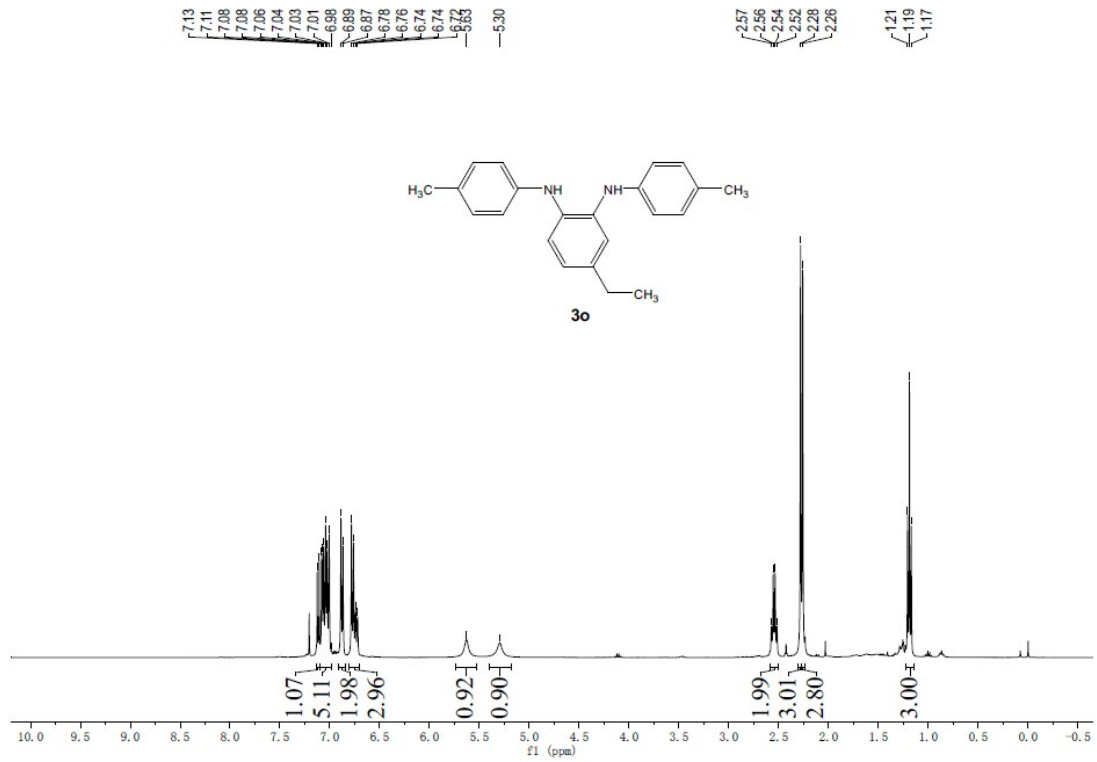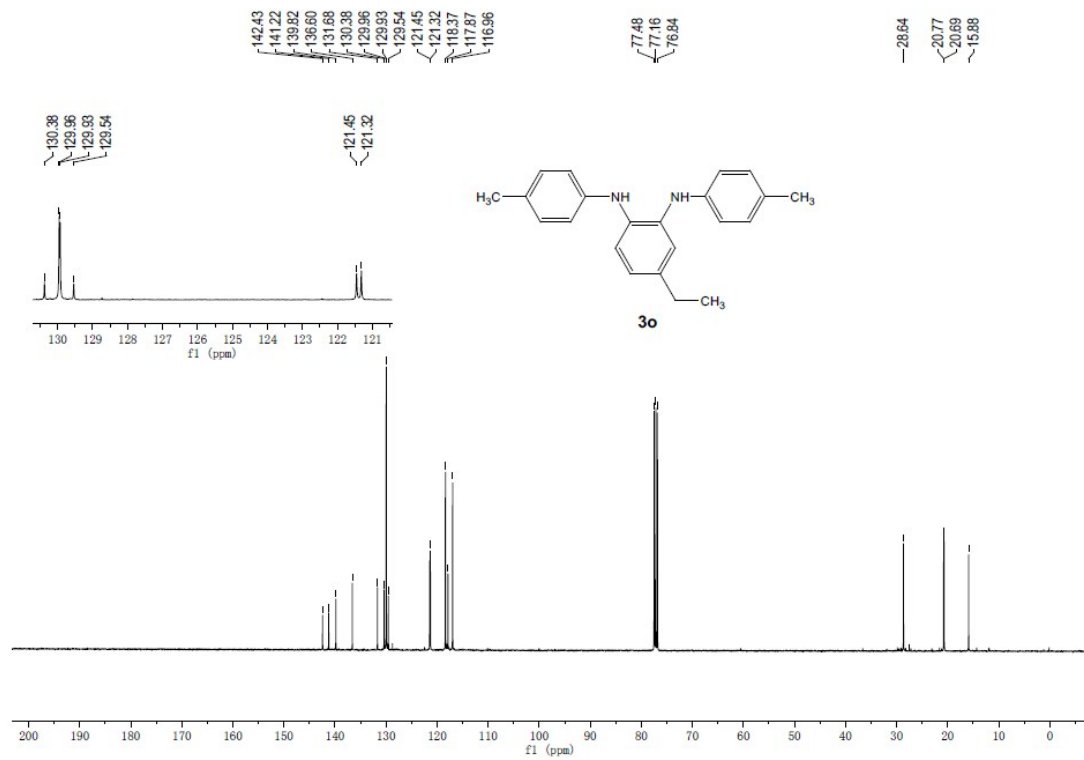

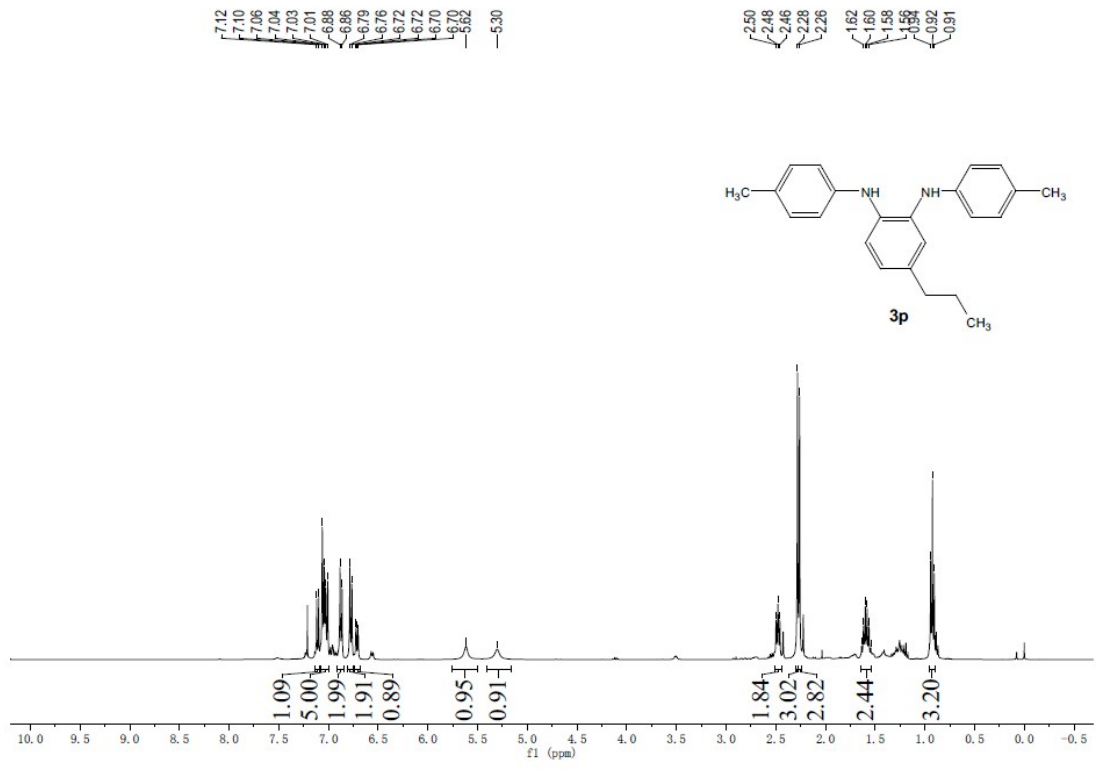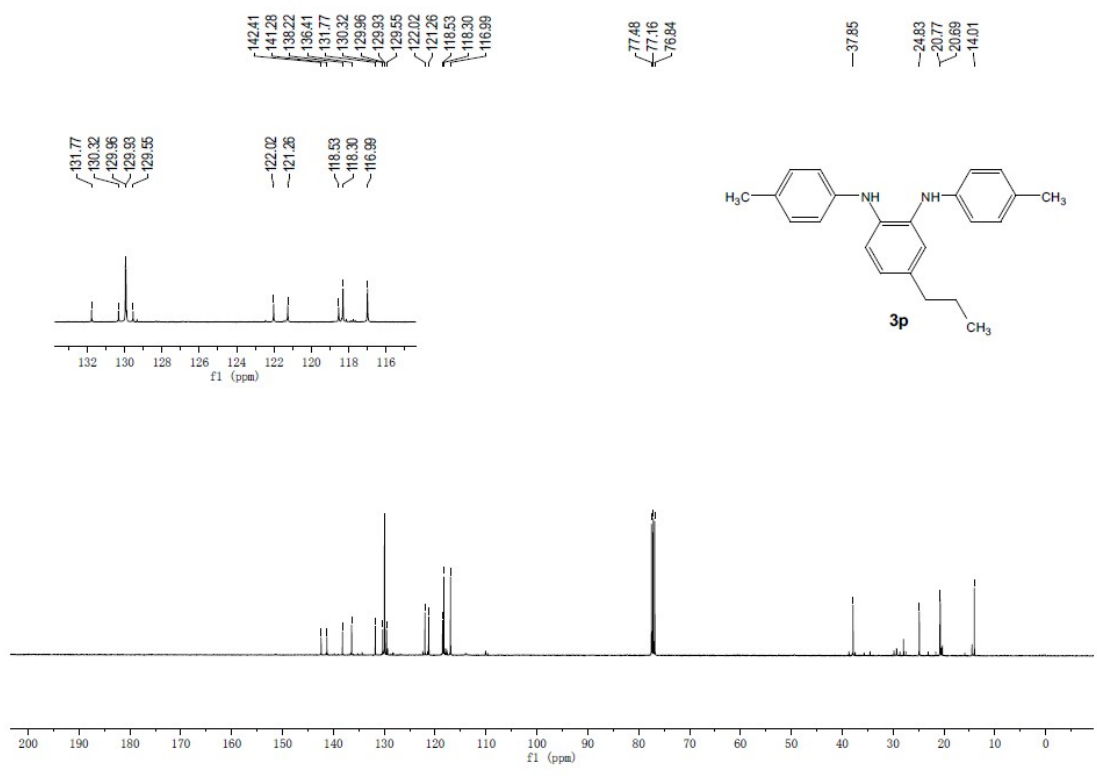

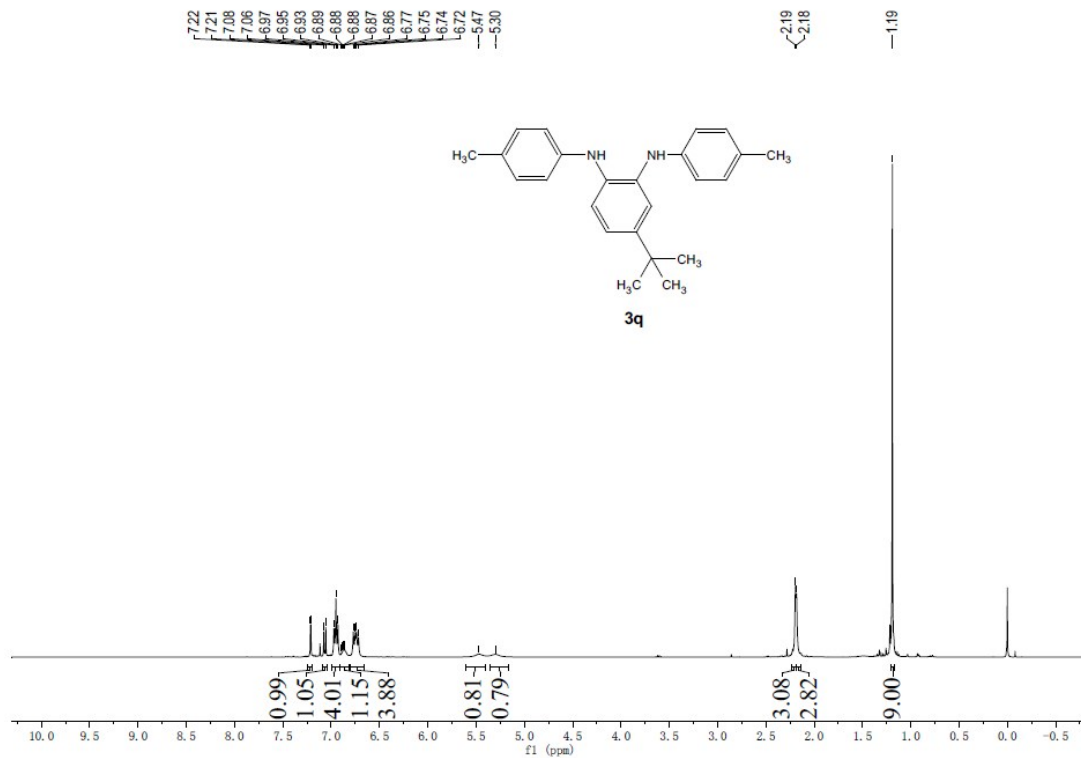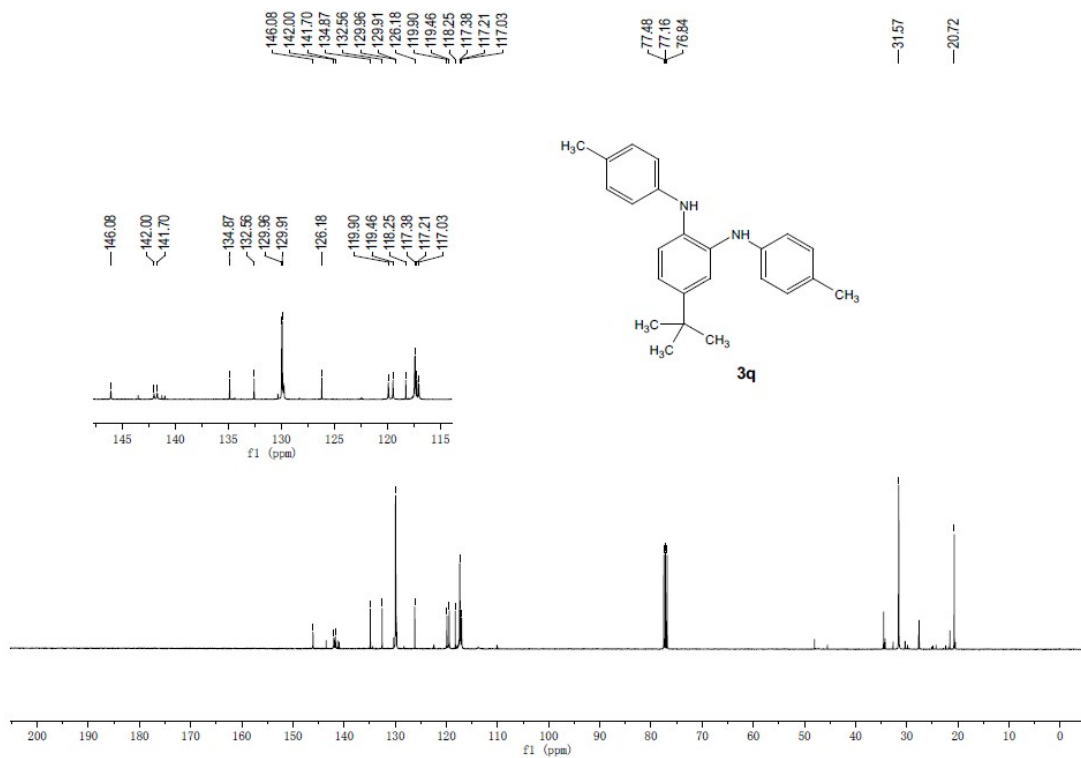

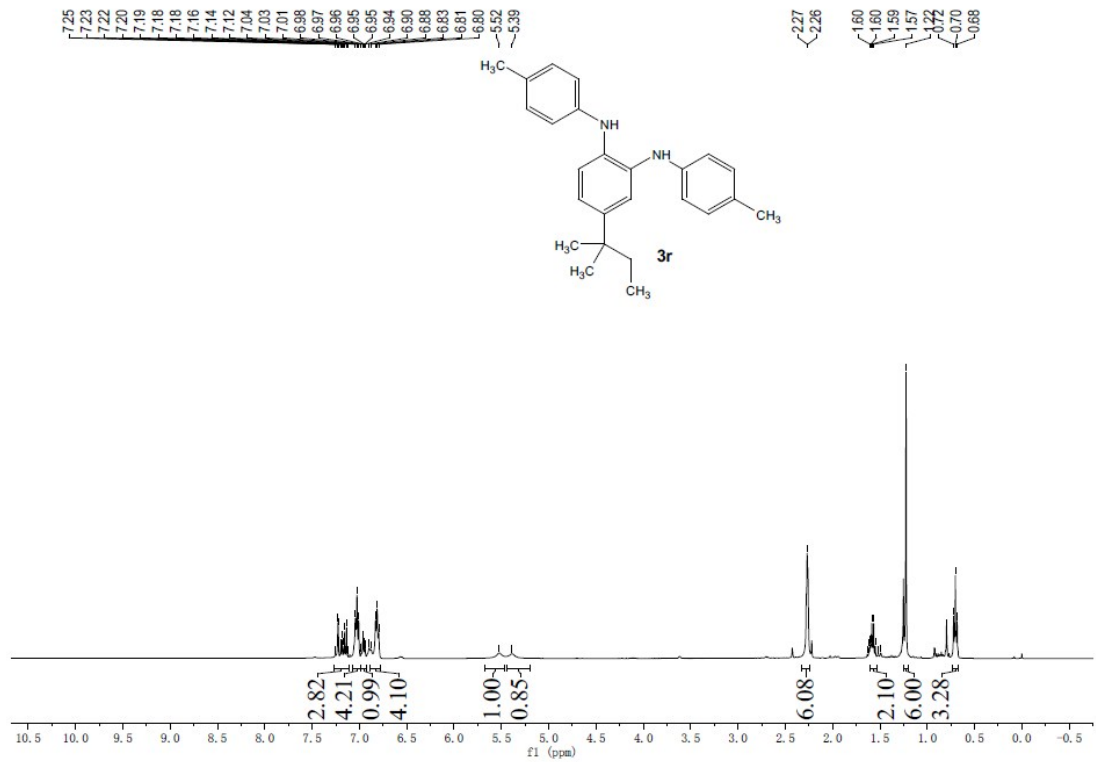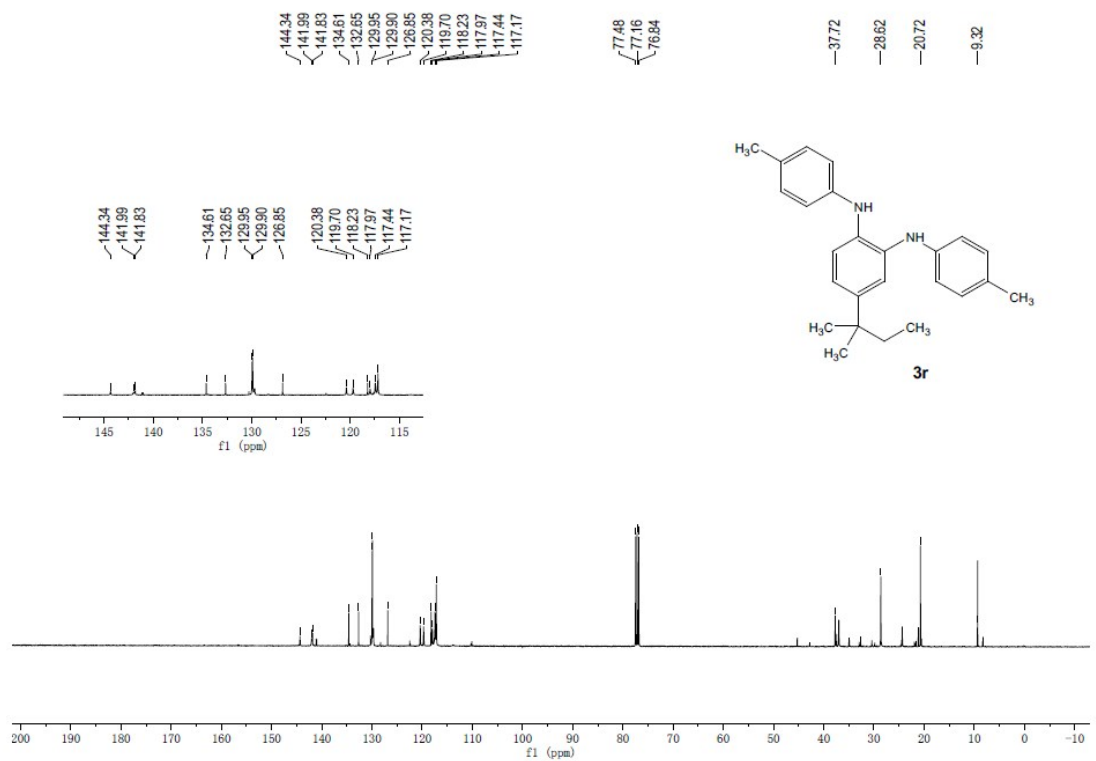

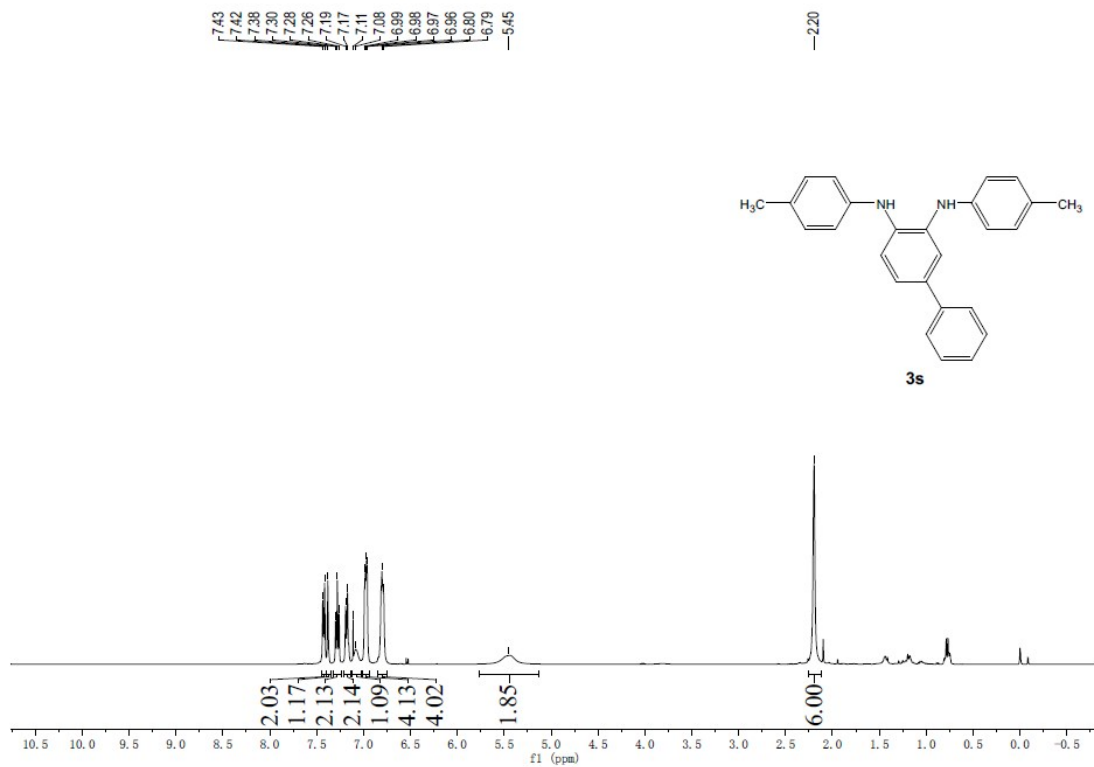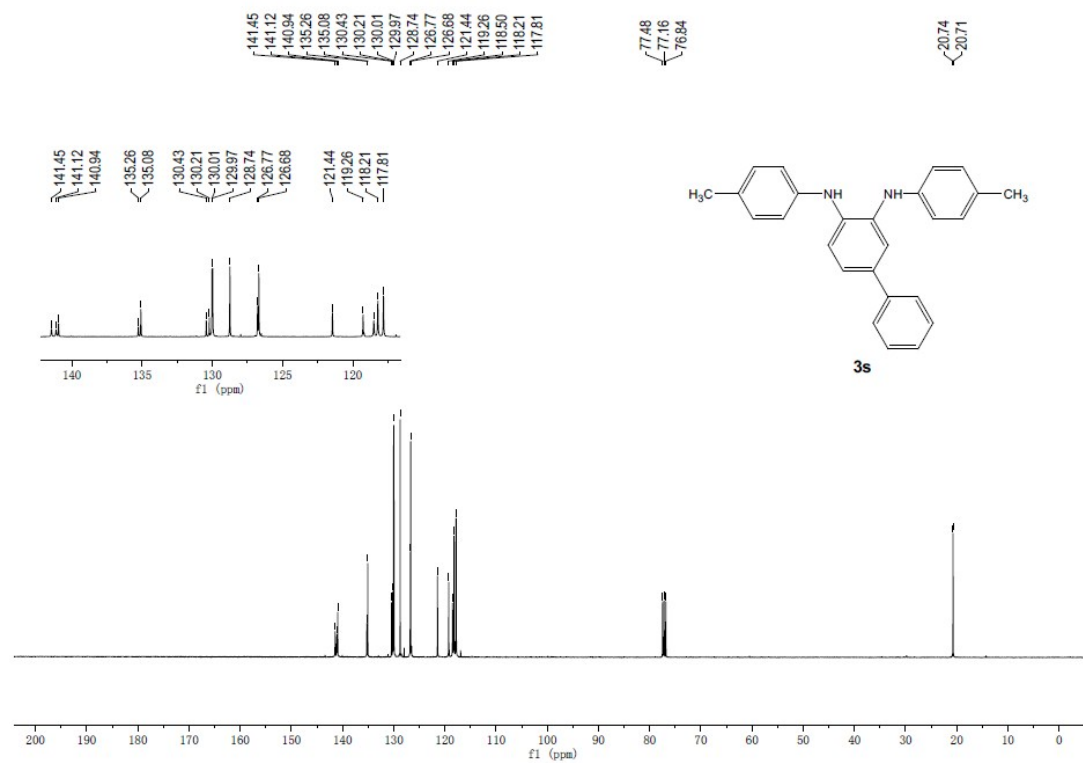

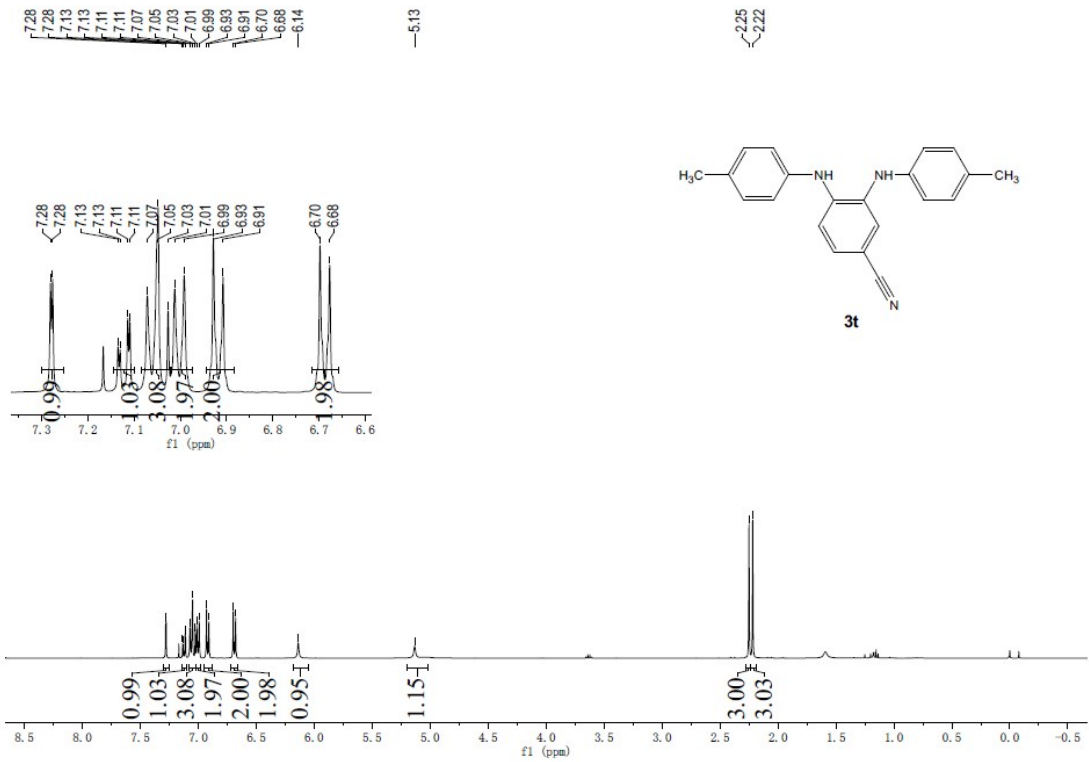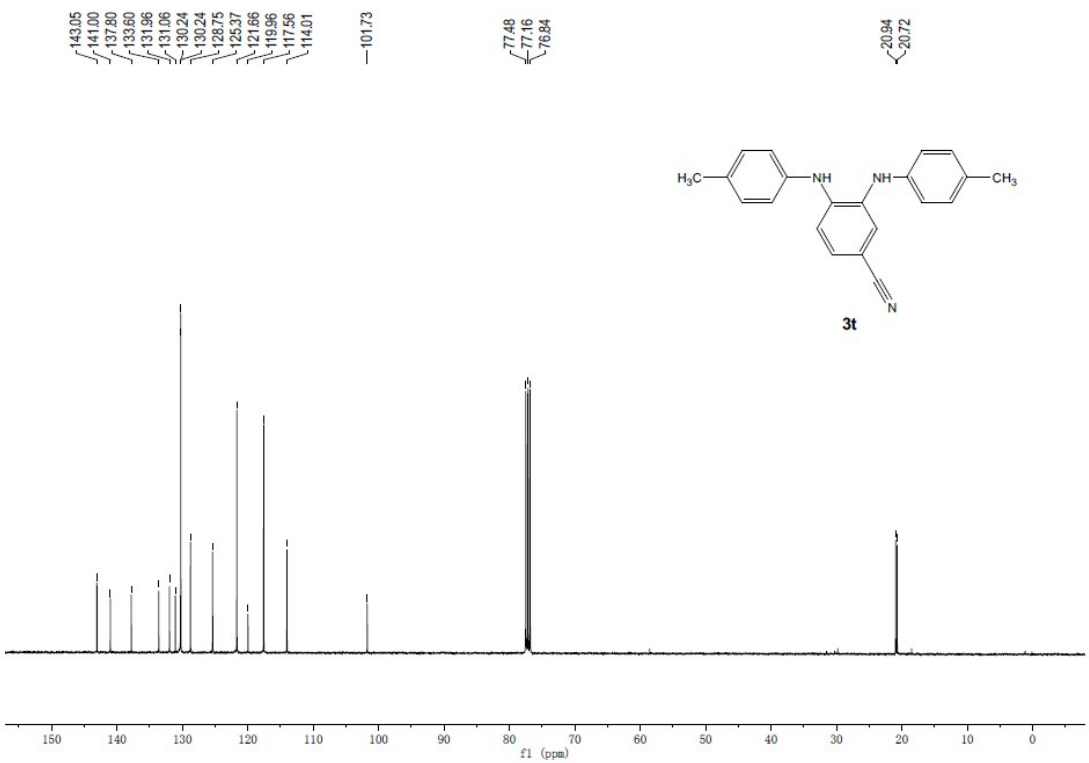

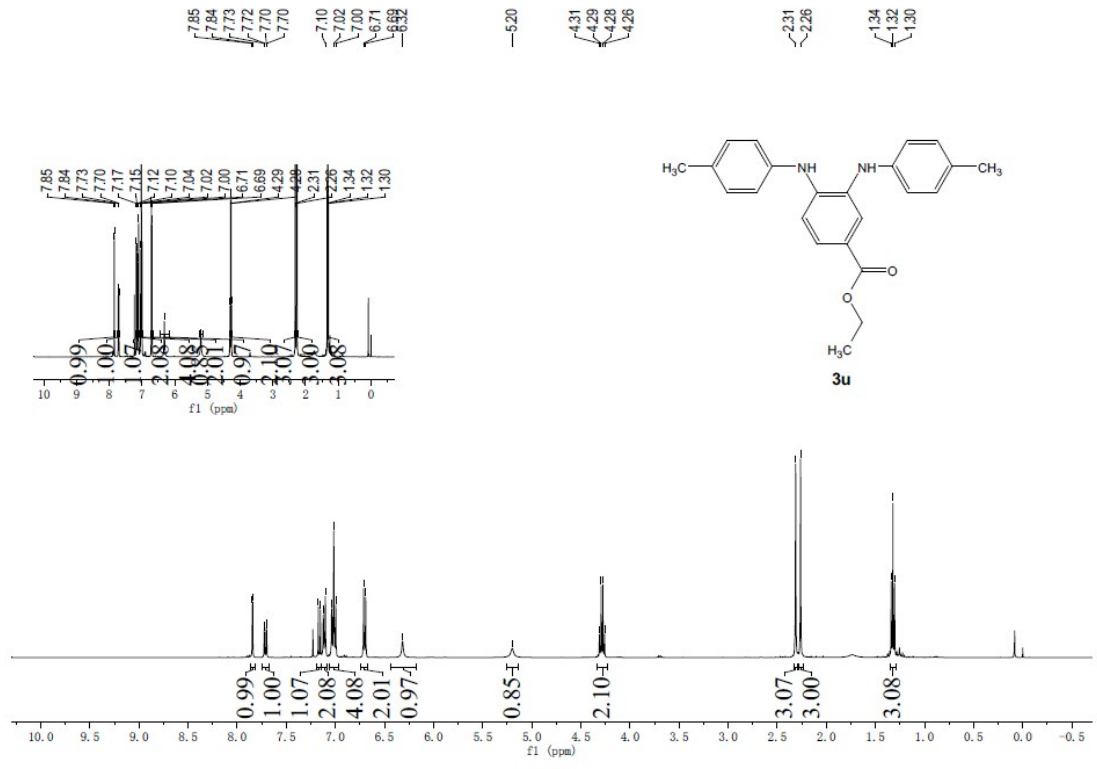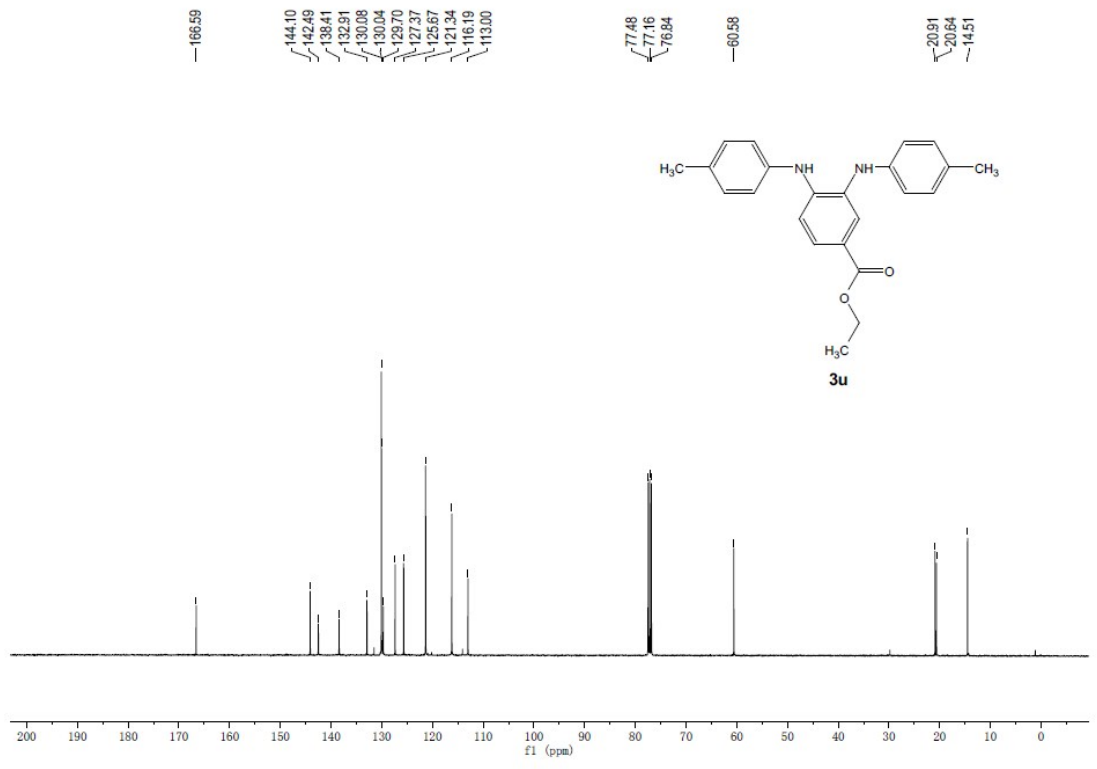

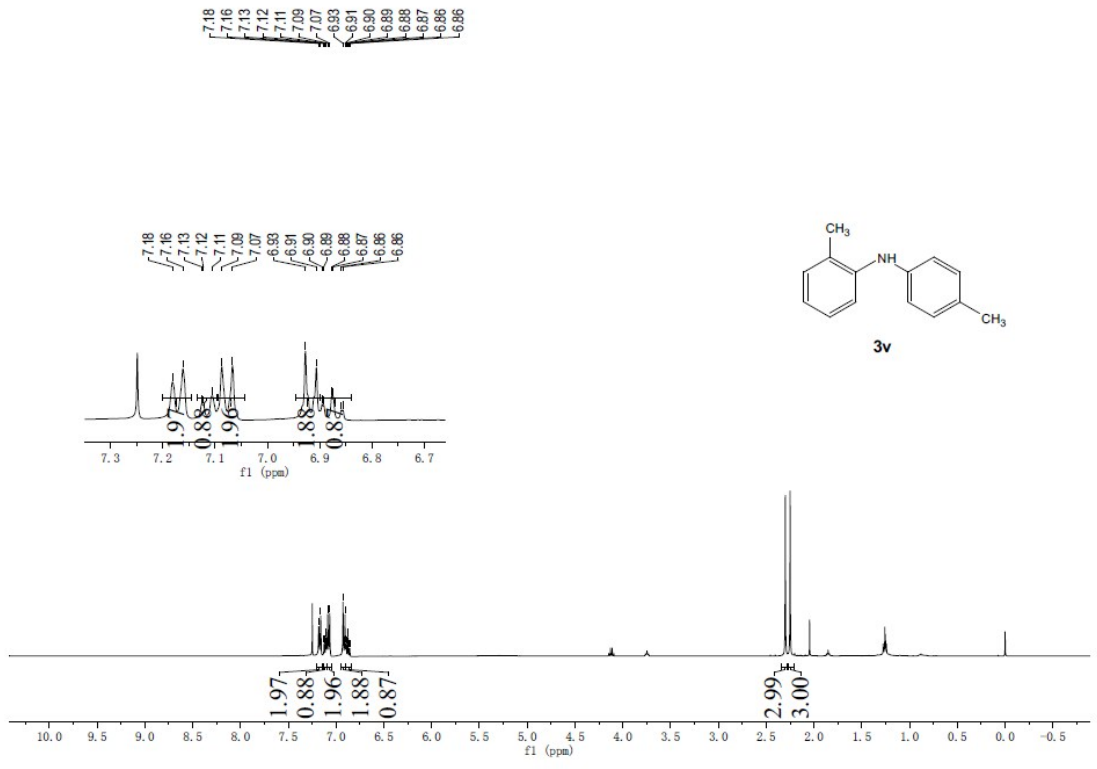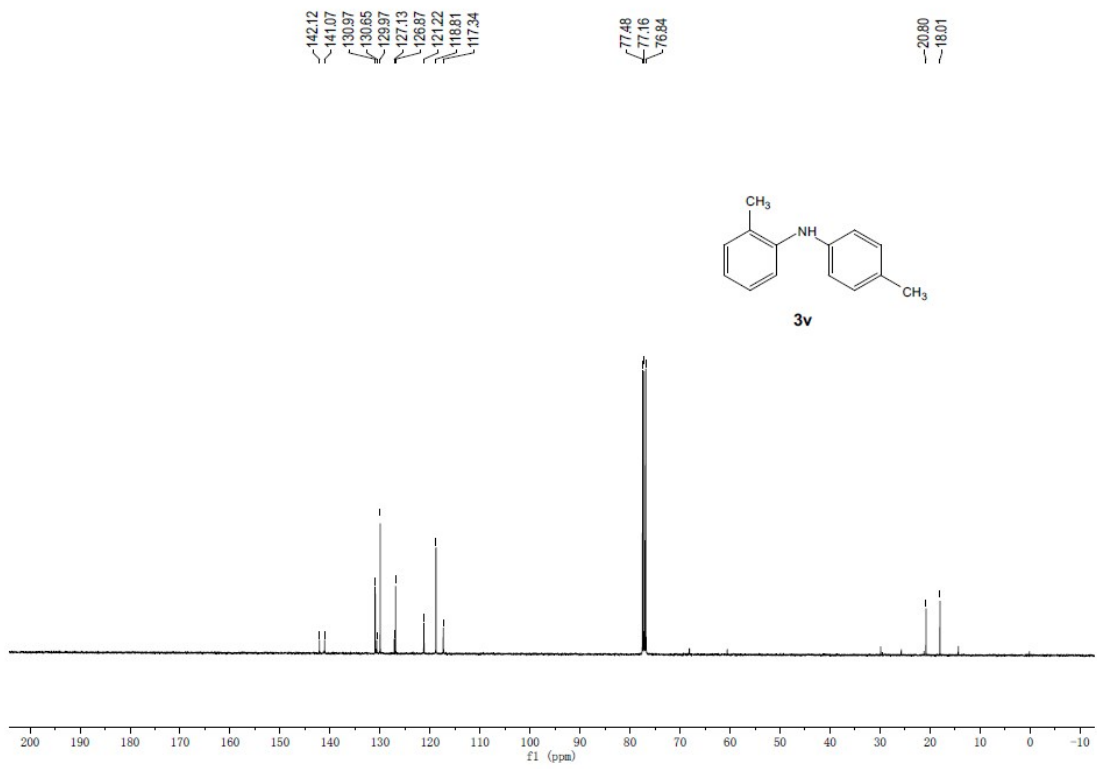



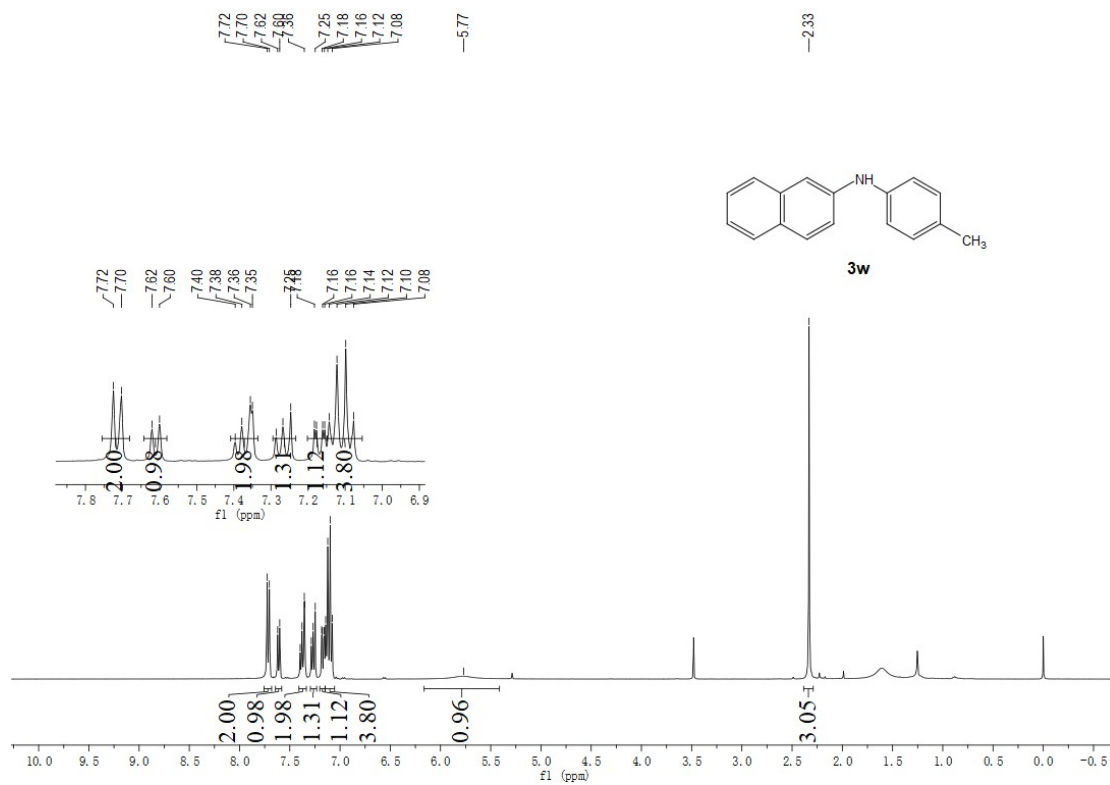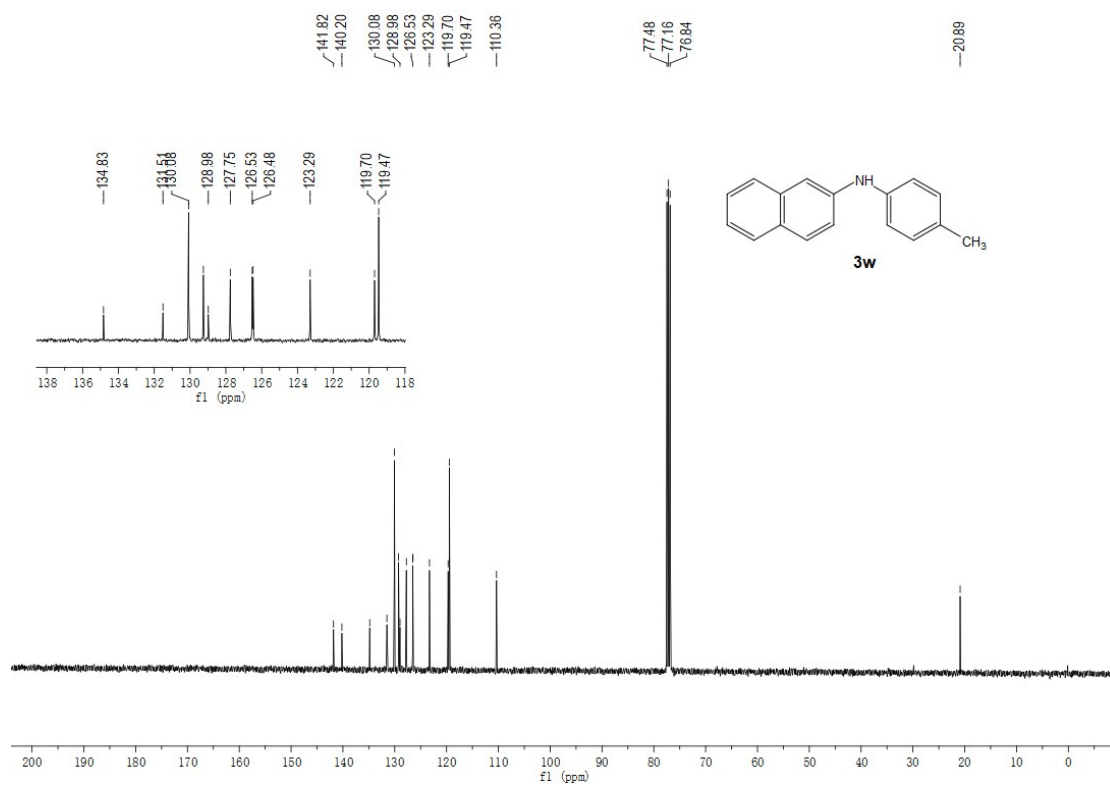

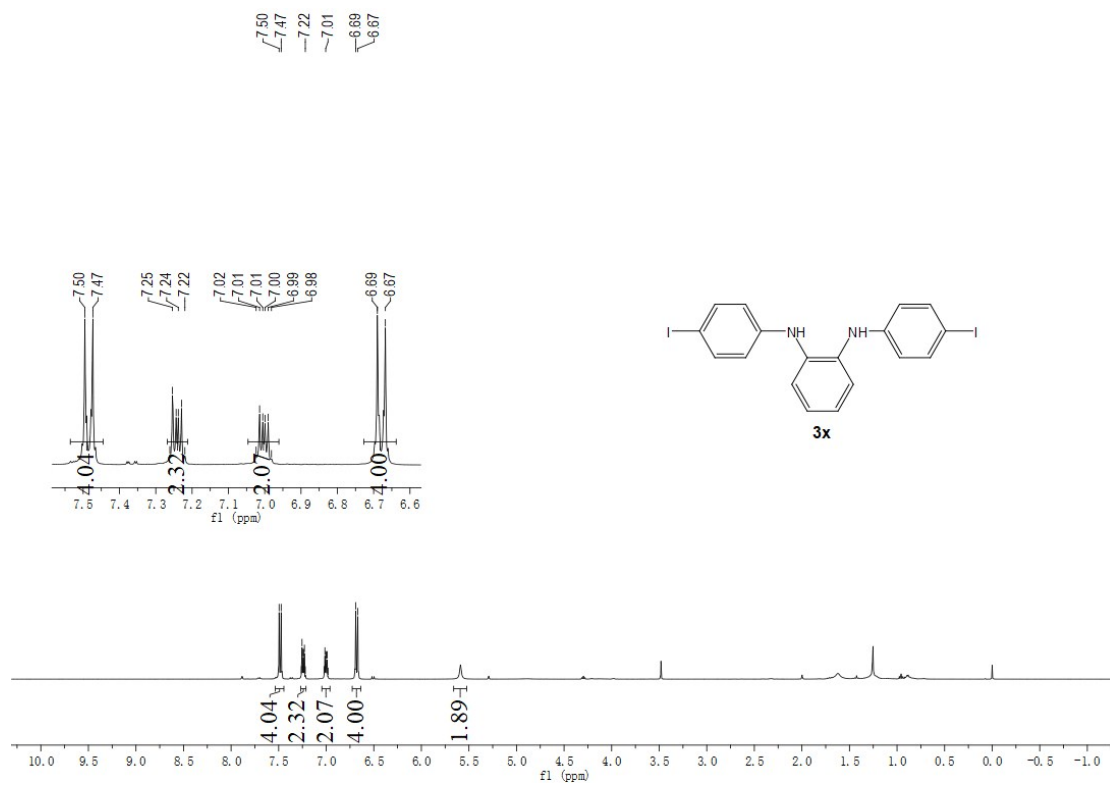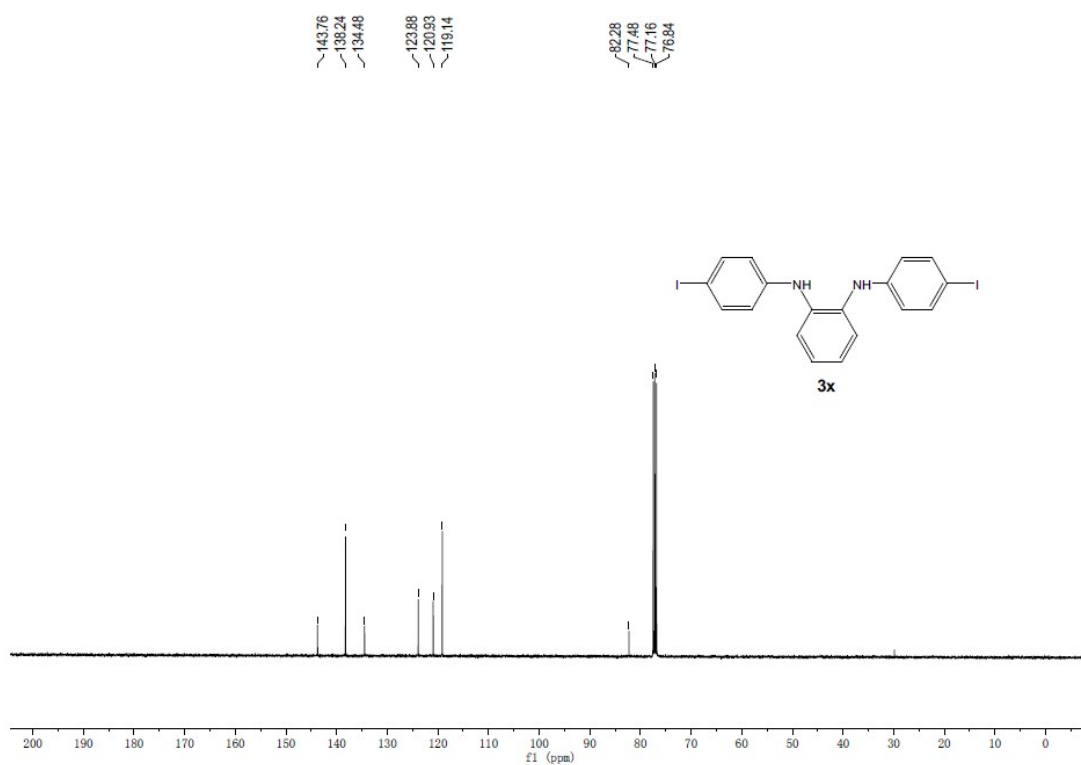

7.28  
7.27  
7.26  
7.25  
7.09  
7.07  
7.05  
7.04  
7.03  
7.02  
7.01  
7.01  
7.00  
6.98  
6.98  
6.81  
6.81  
6.80  
6.79  
6.79  
-5.60

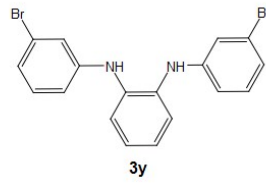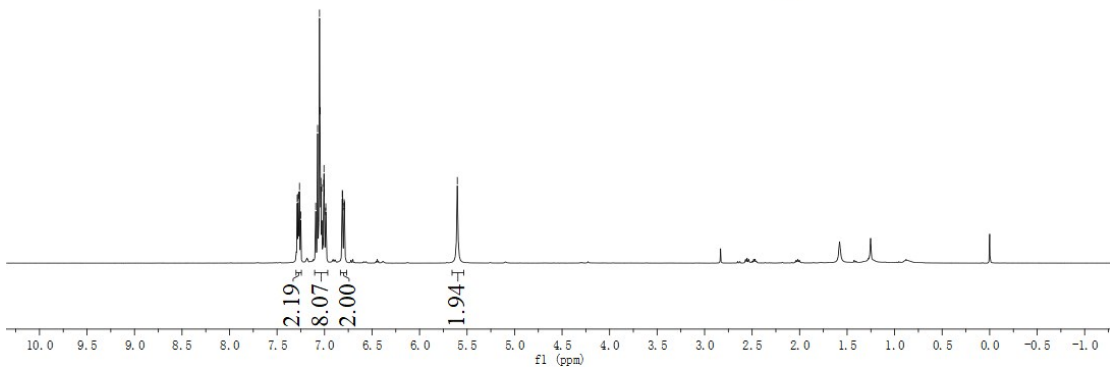

145.49  
134.36  
130.80  
124.15  
119.59  
115.49  
77.48  
77.16  
76.84

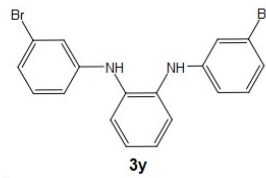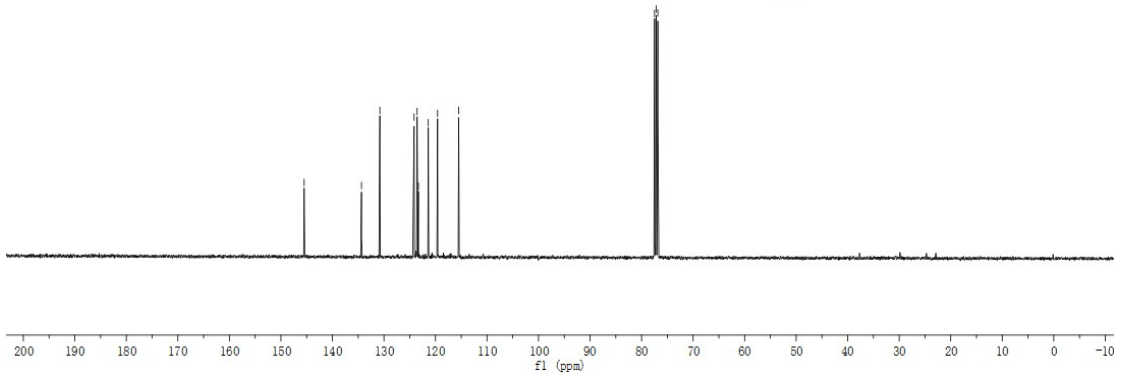

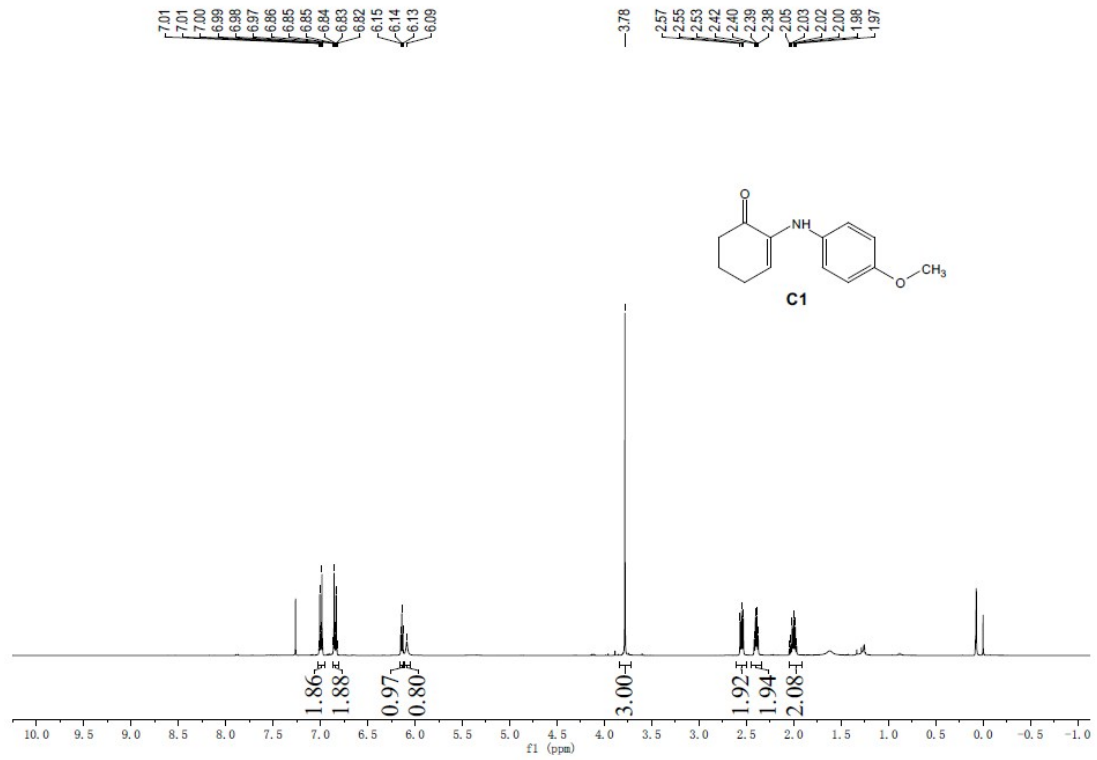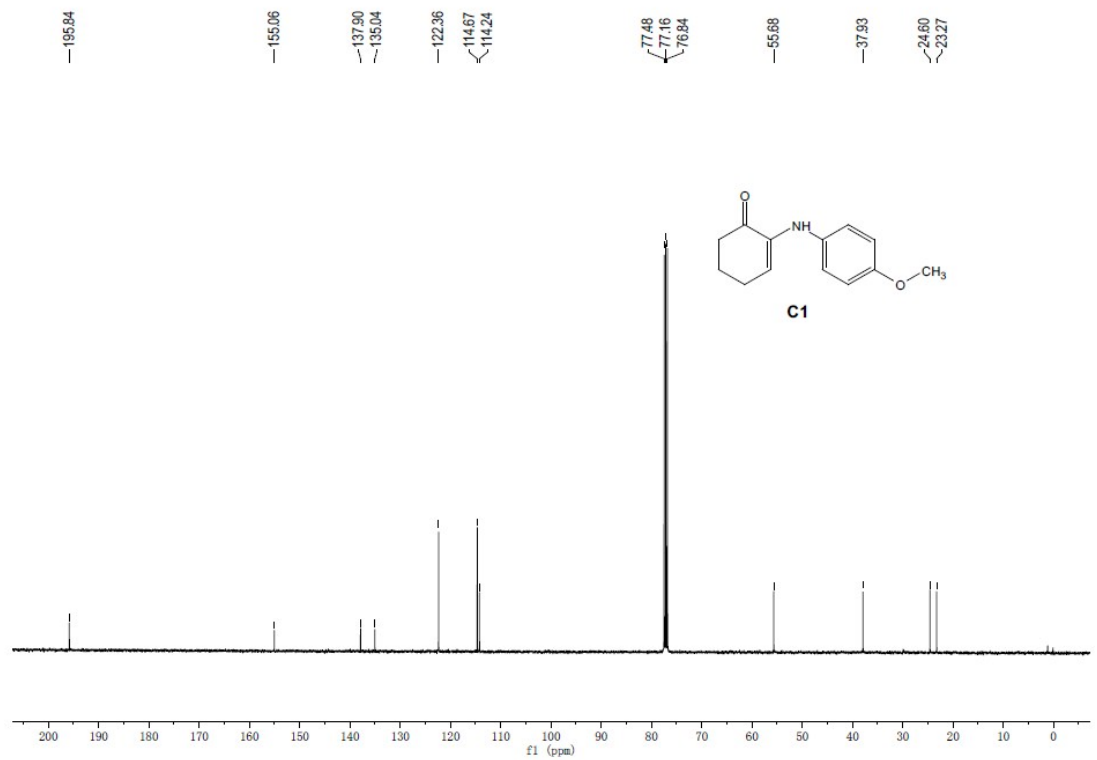

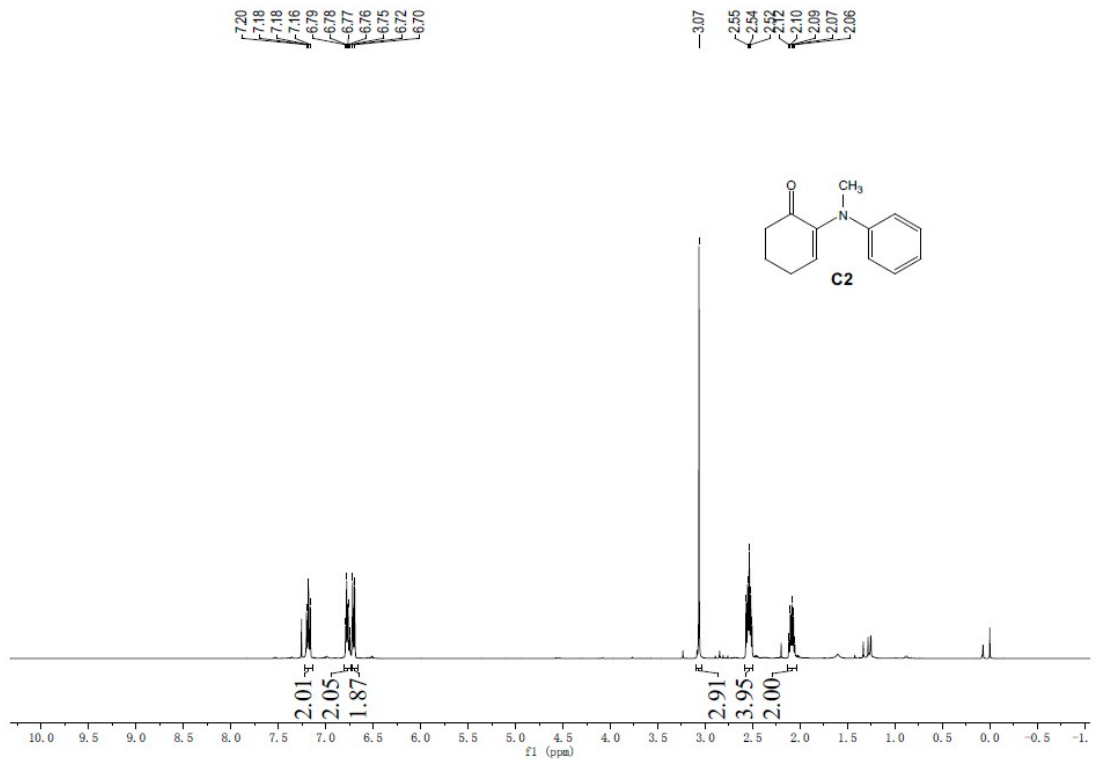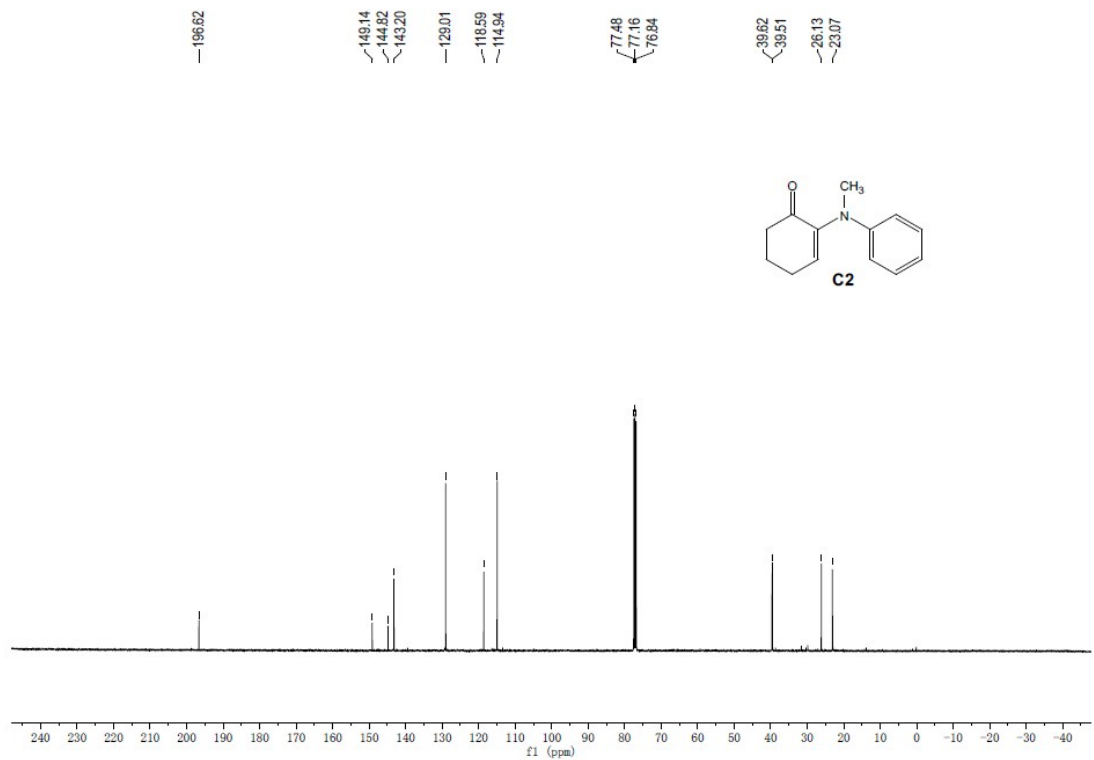

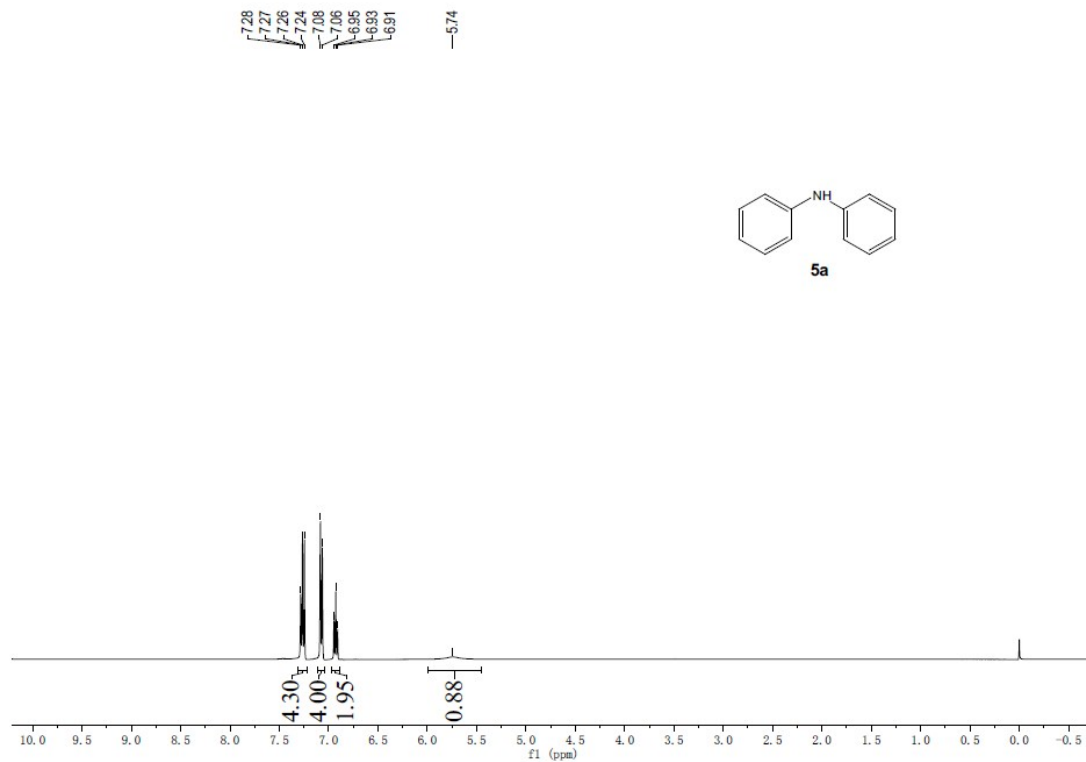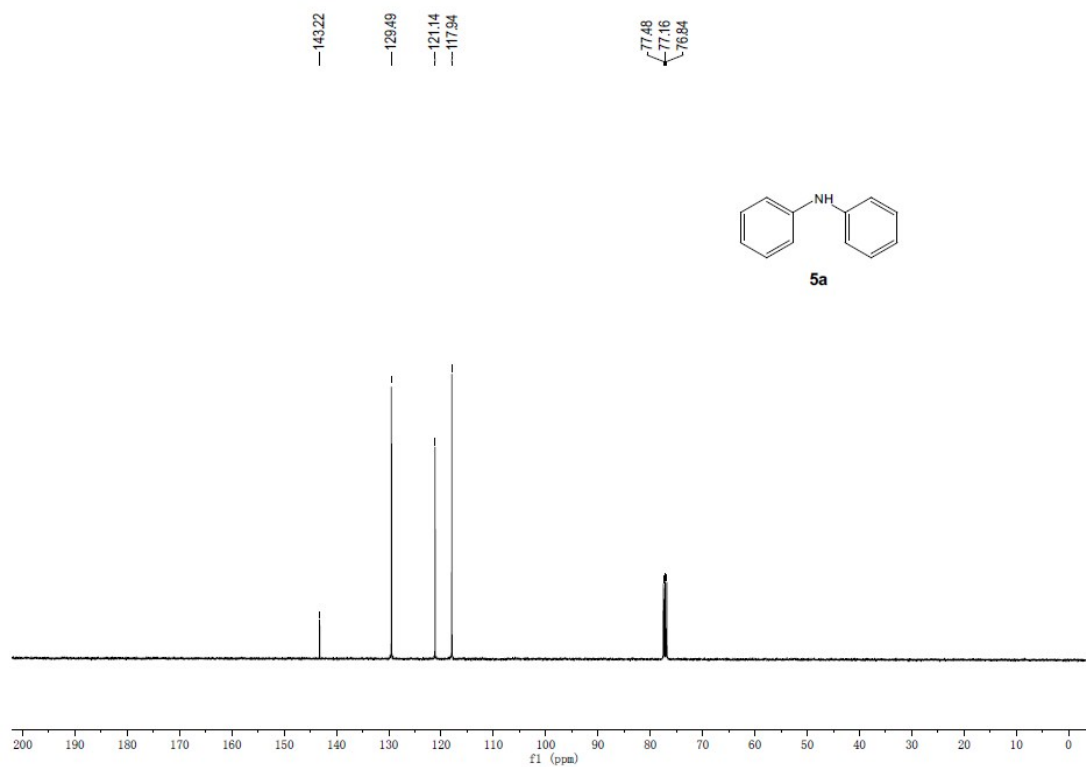

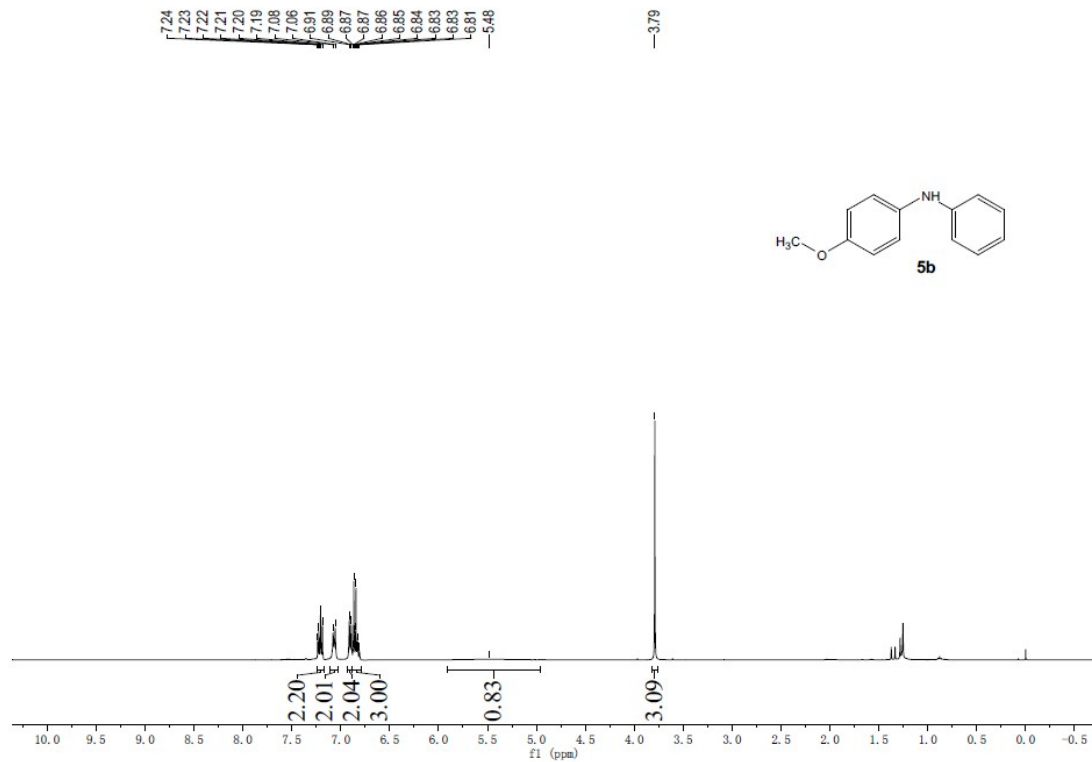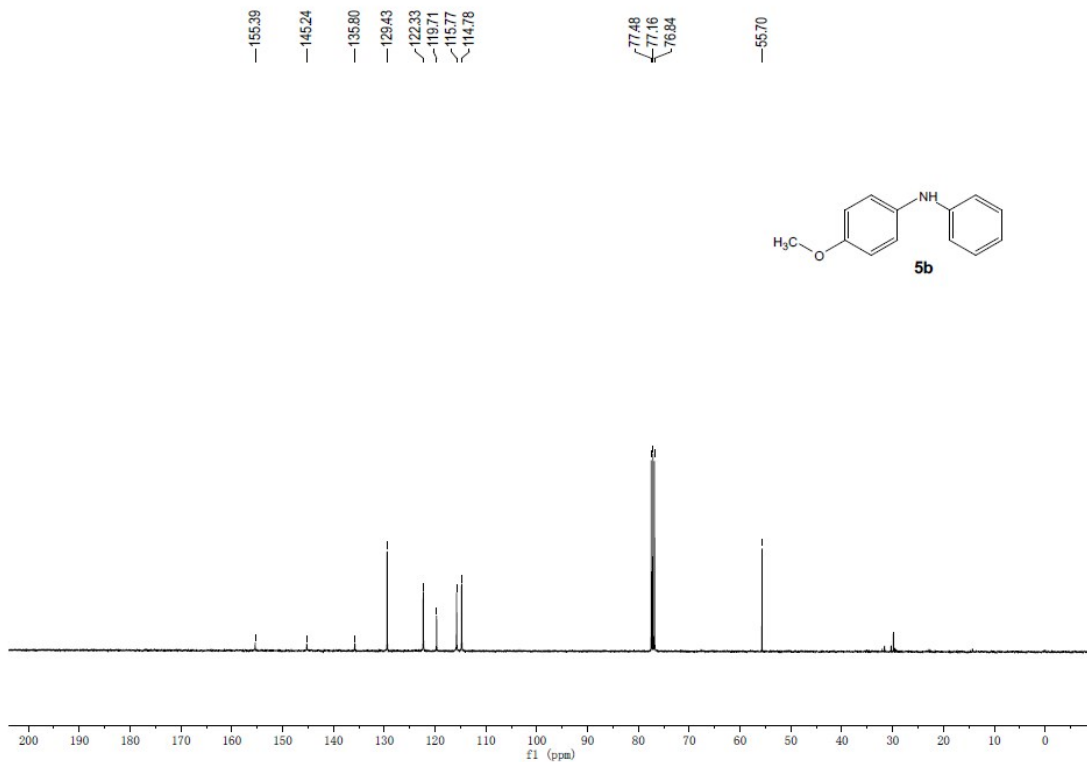

7.85  
7.84  
7.70  
7.68  
7.68  
7.39  
7.37  
7.37  
7.35  
7.35  
7.35  
7.33  
7.30  
7.29  
7.29  
7.16  
7.16  
7.14  
7.13  
7.08

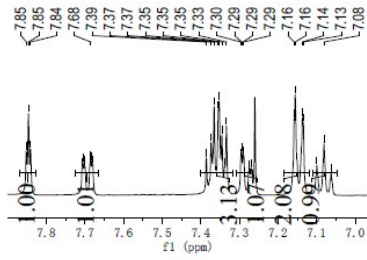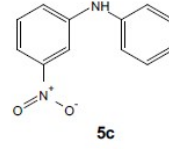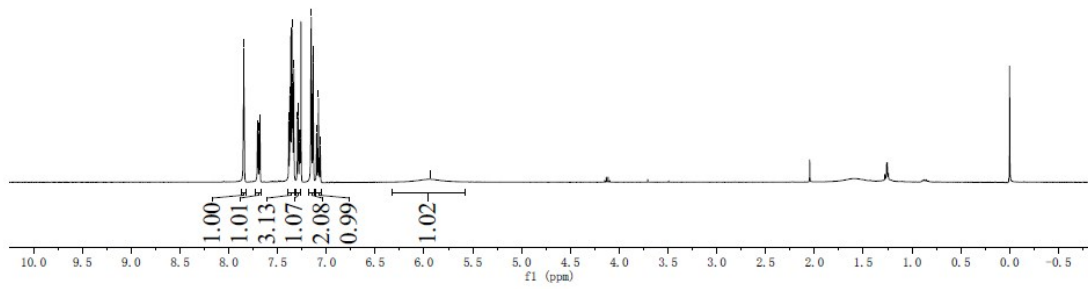

149.49  
145.20  
141.08  
130.15  
129.95  
123.36  
121.97  
120.01  
114.84  
110.40

77.48  
77.16  
76.84

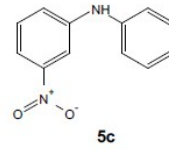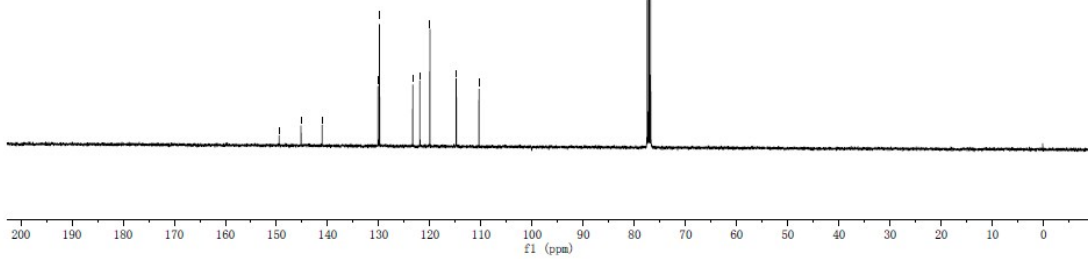



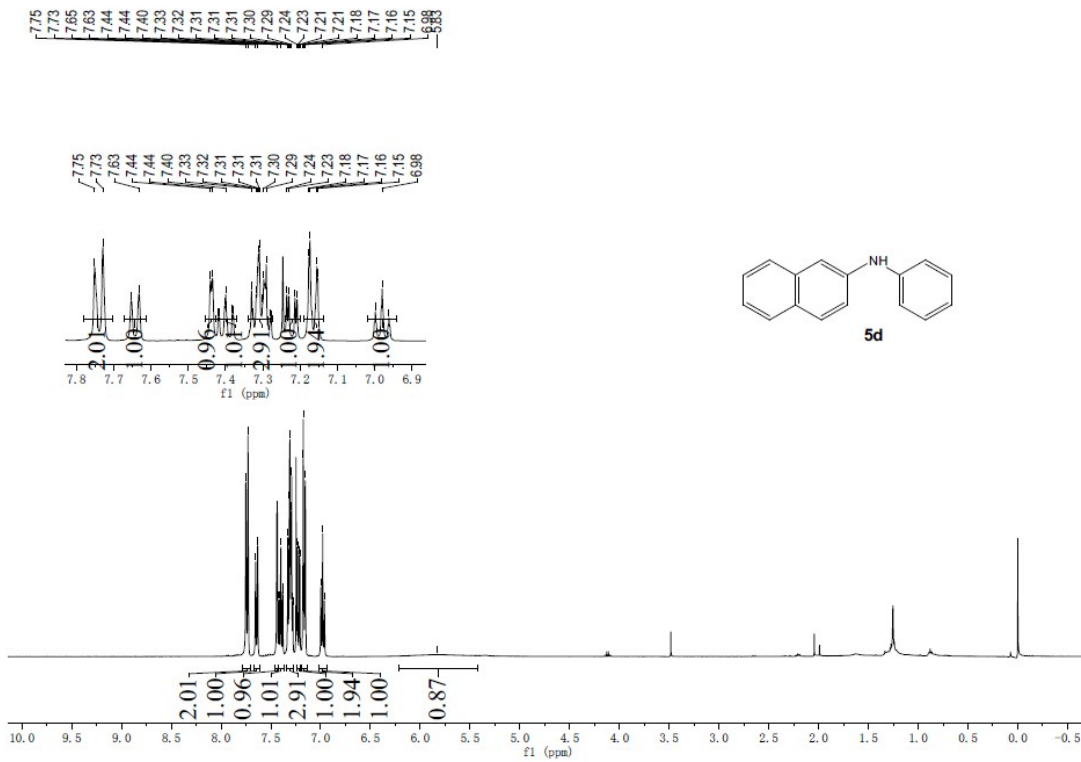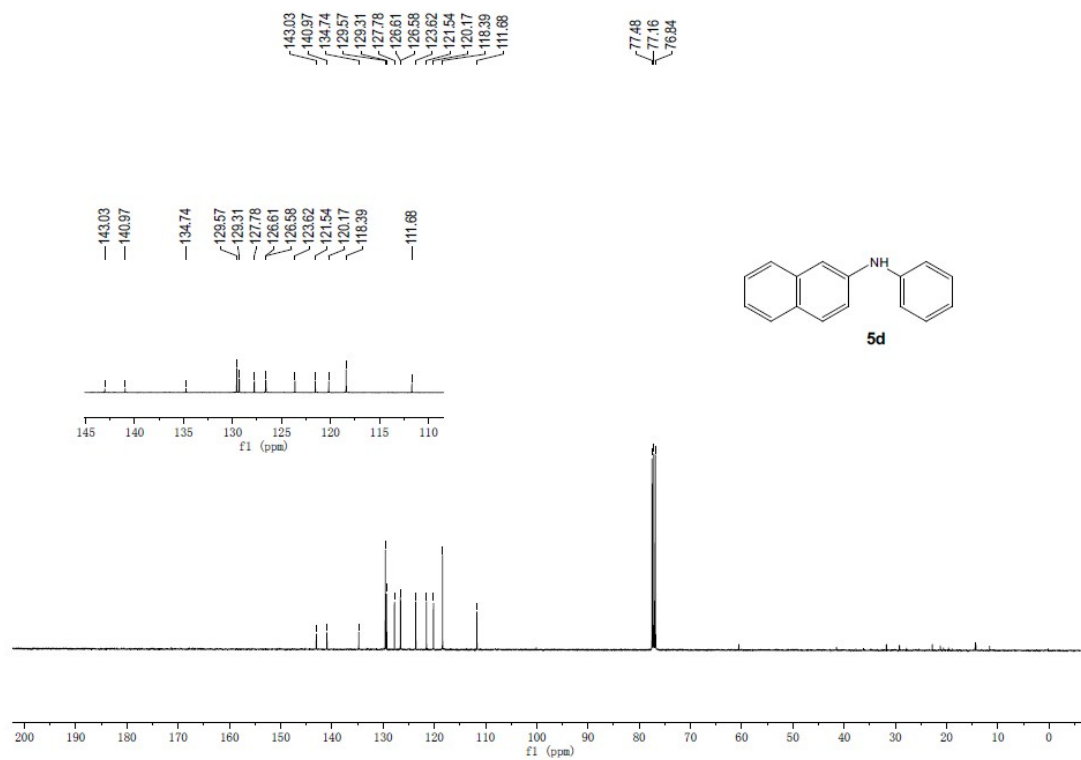

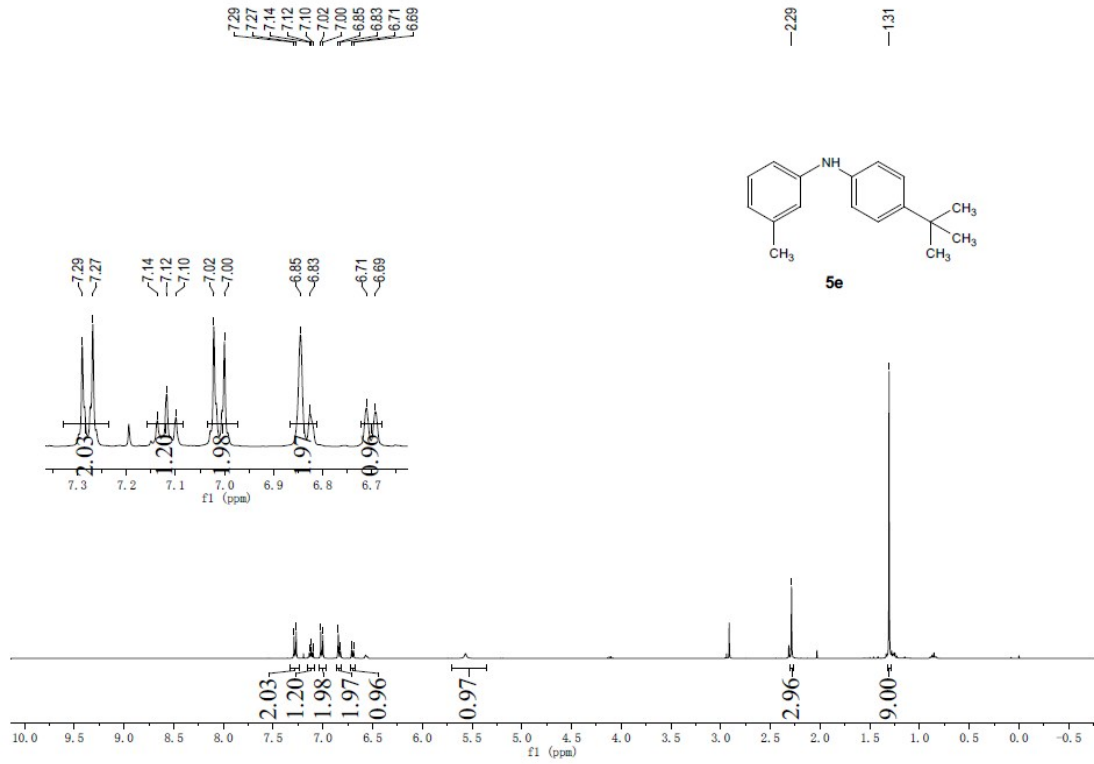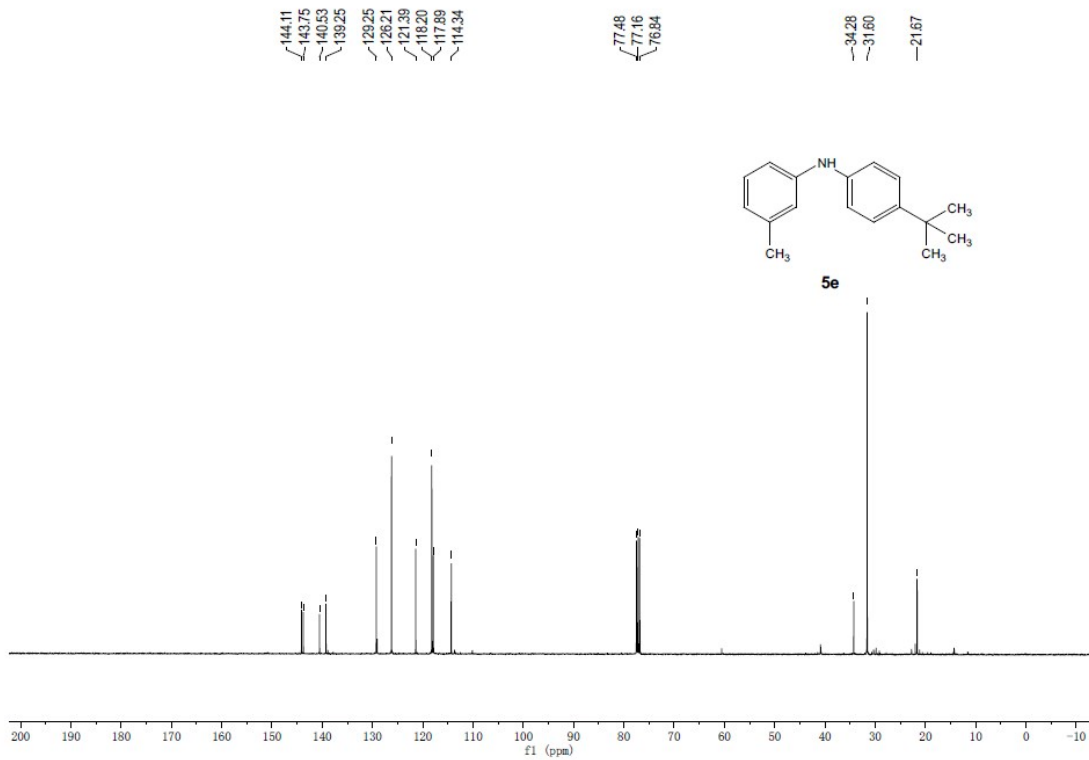

7.47  
7.45  
7.34  
7.32  
7.31  
7.15  
7.13  
7.07  
7.05  
7.04  
7.03  
7.02  
-5.91

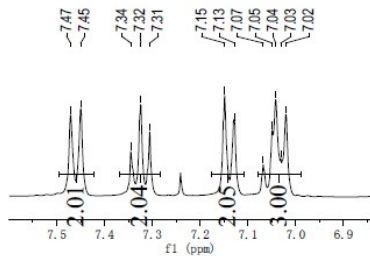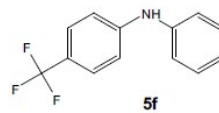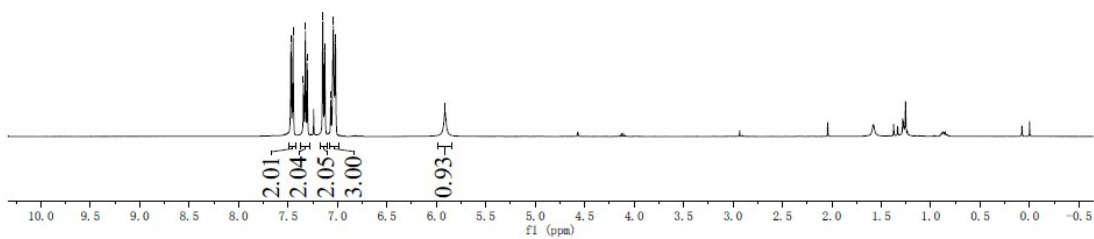

146.89  
141.27  
129.88  
128.79  
126.88  
126.84  
126.81  
126.77  
126.71  
126.10  
123.40  
123.06  
122.24  
121.91  
121.59  
121.26  
120.71  
120.15  
115.45  
77.48  
77.16  
76.84

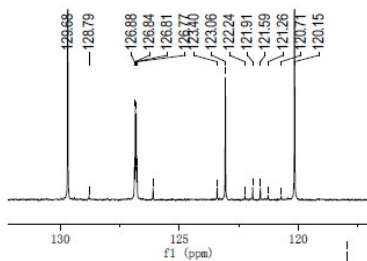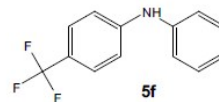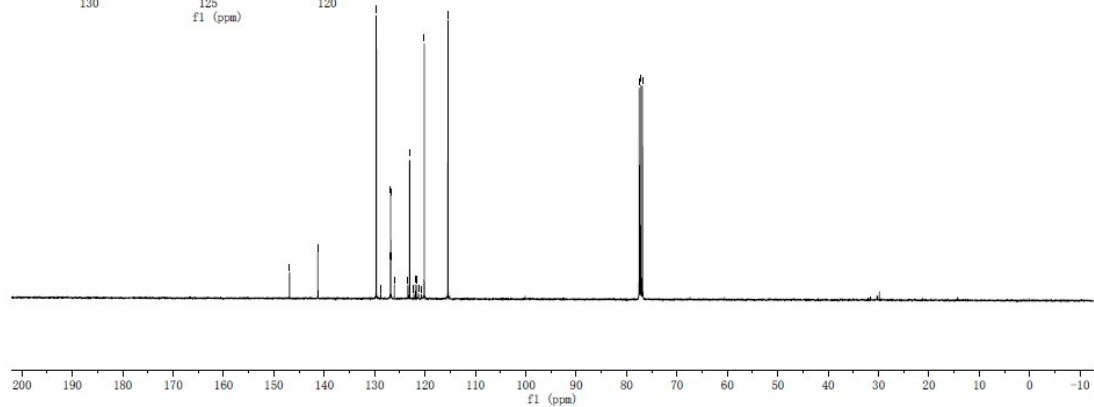

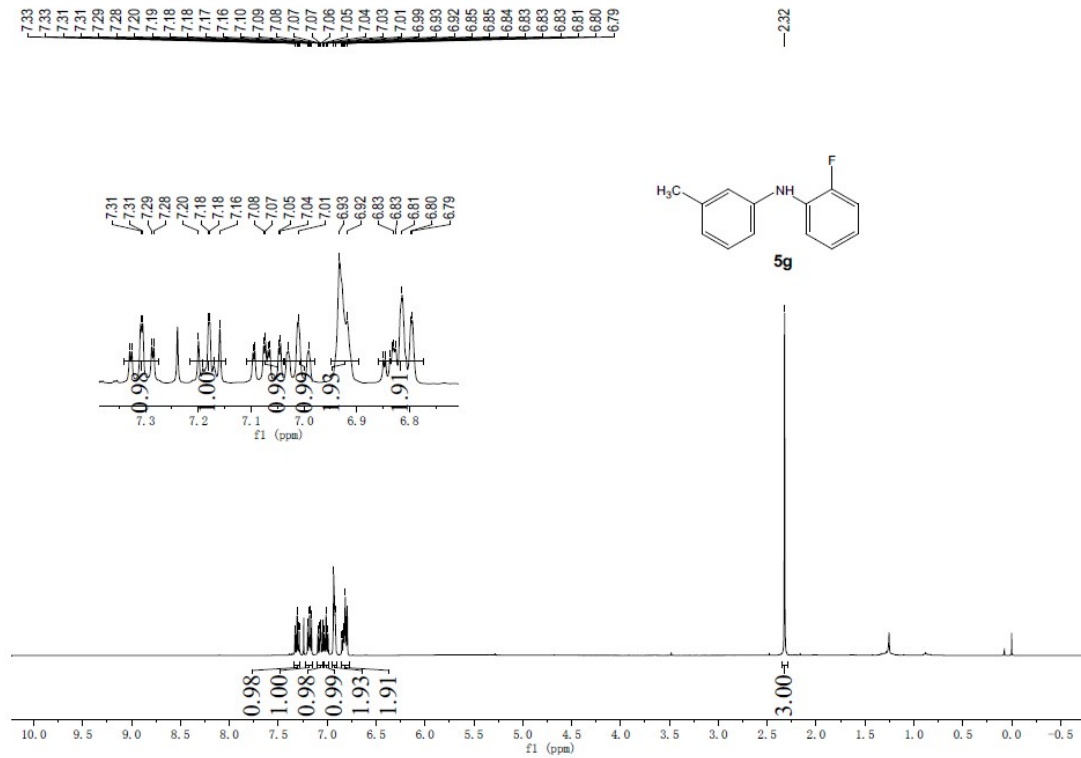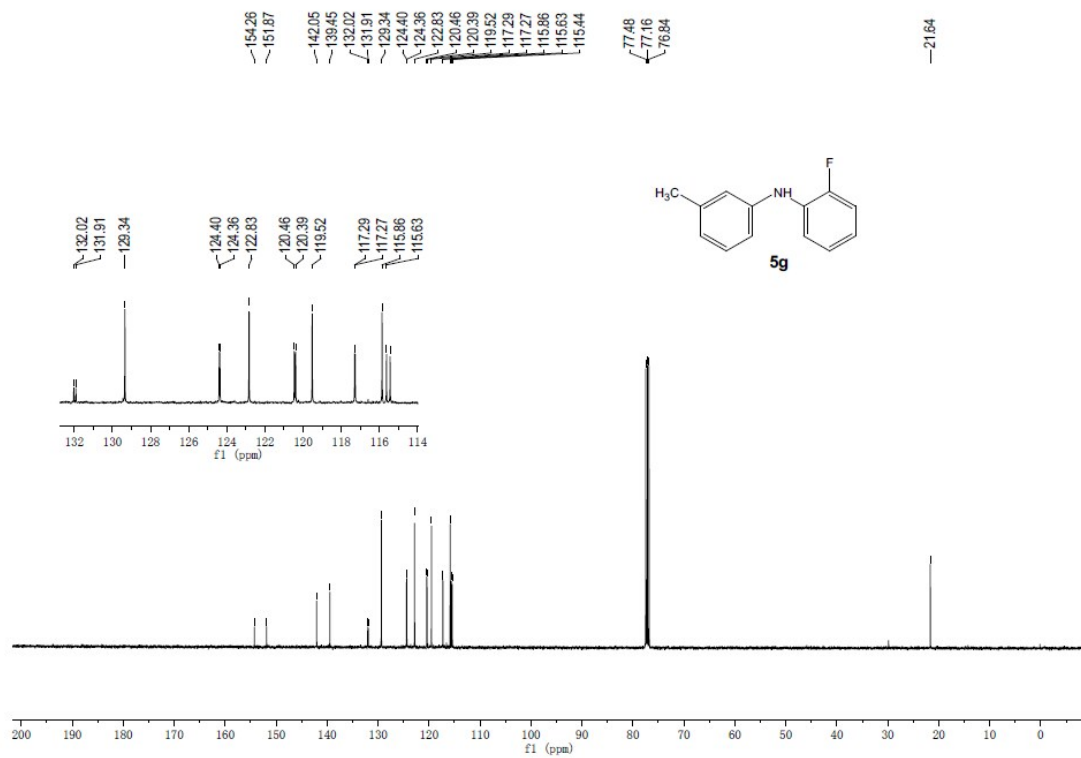

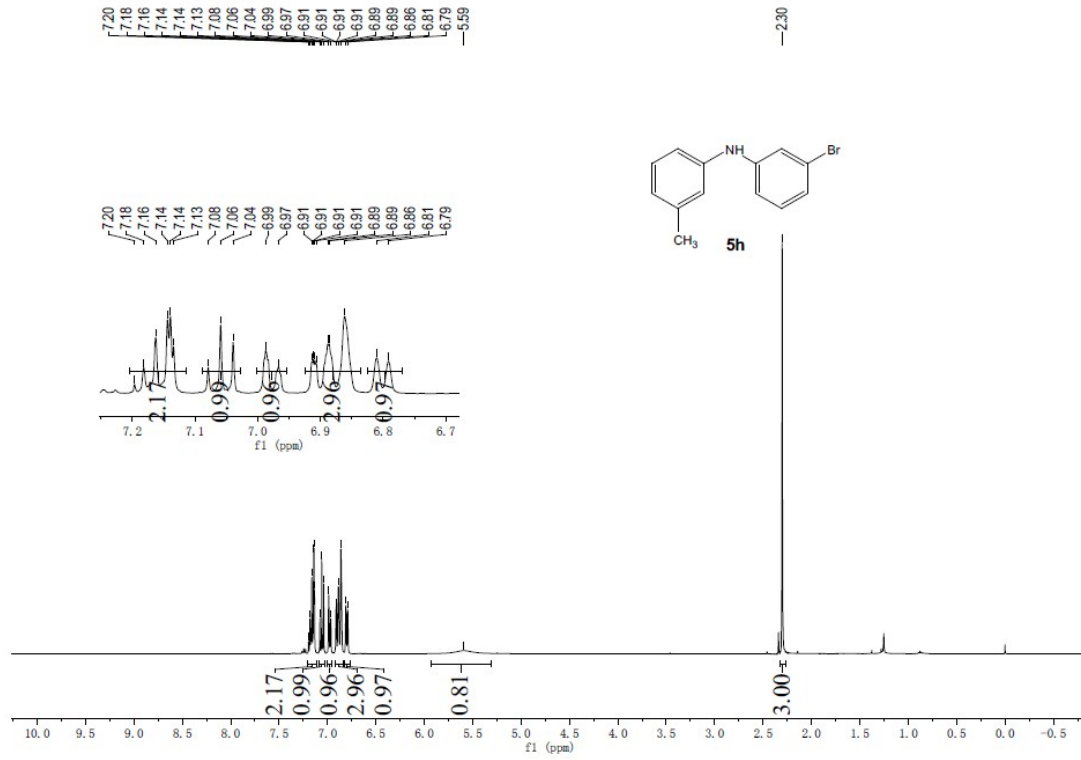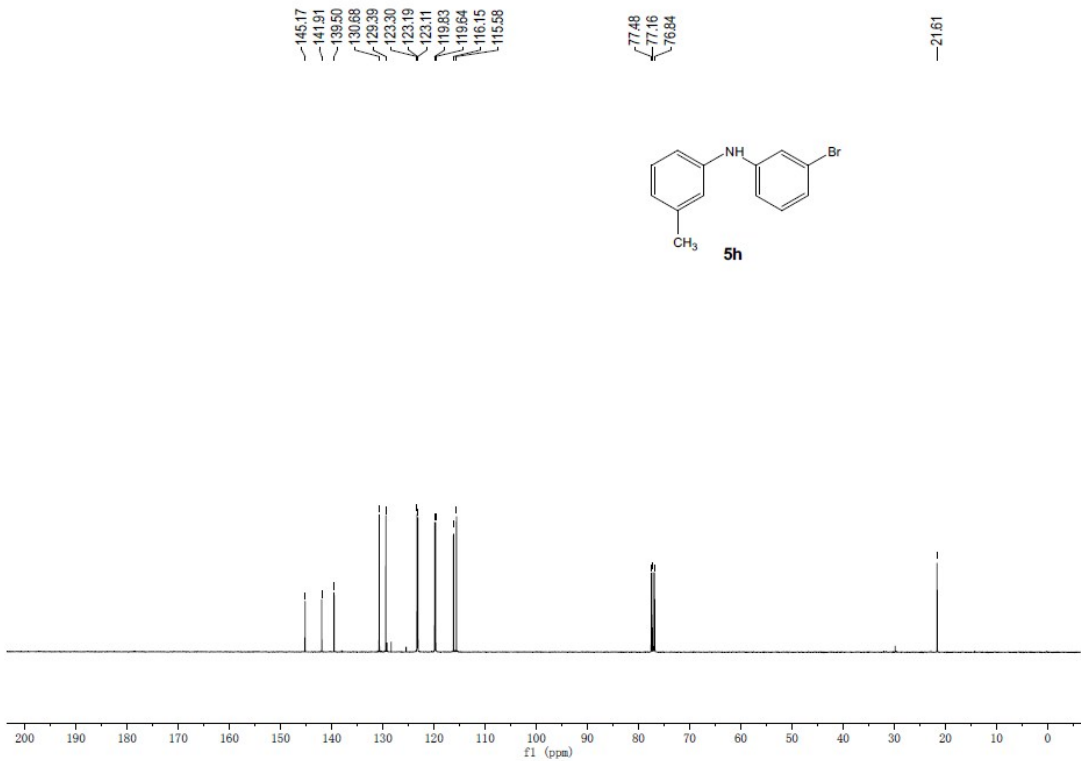

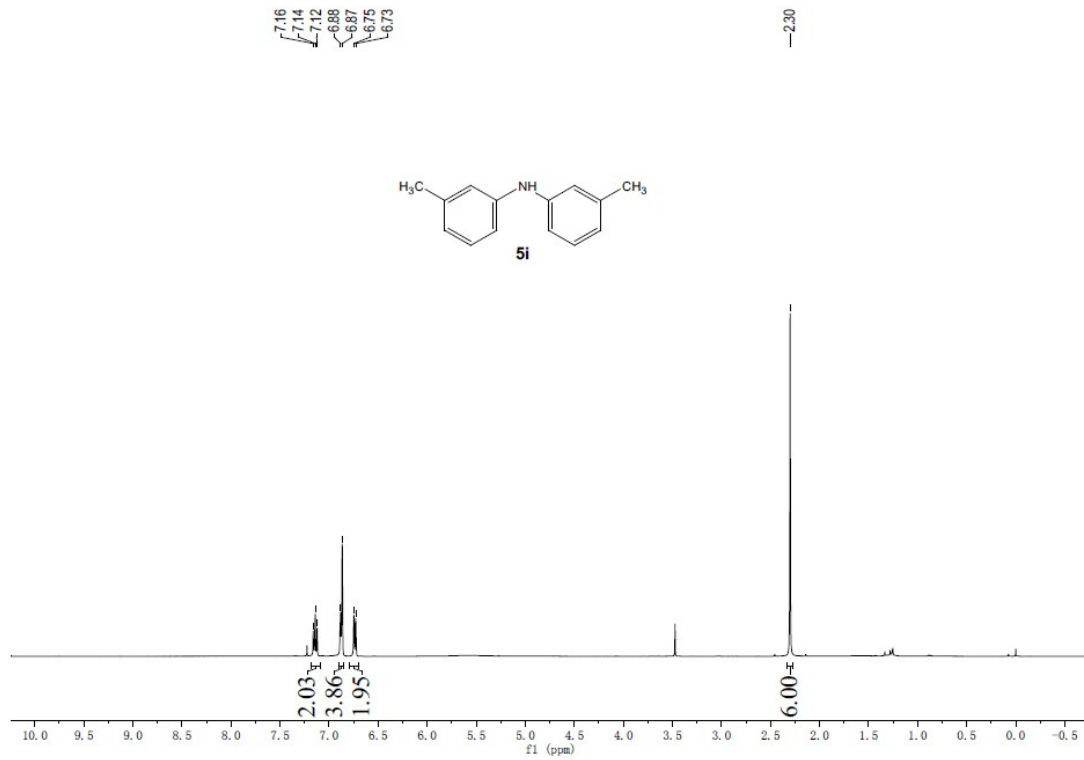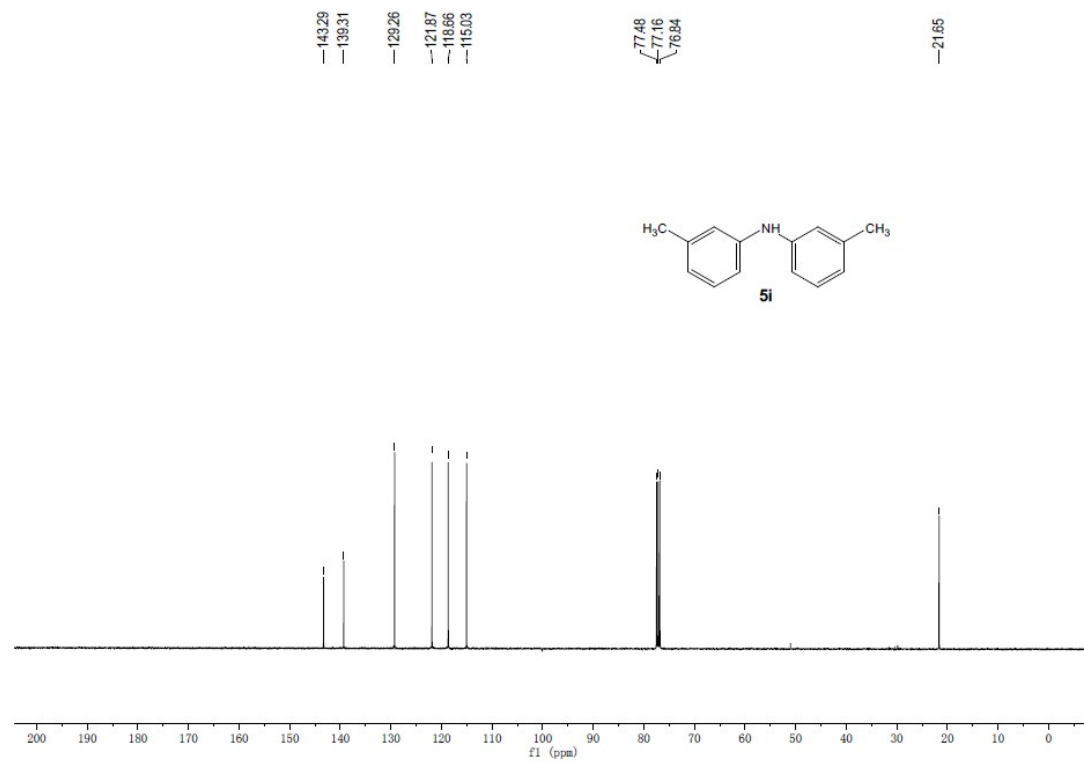

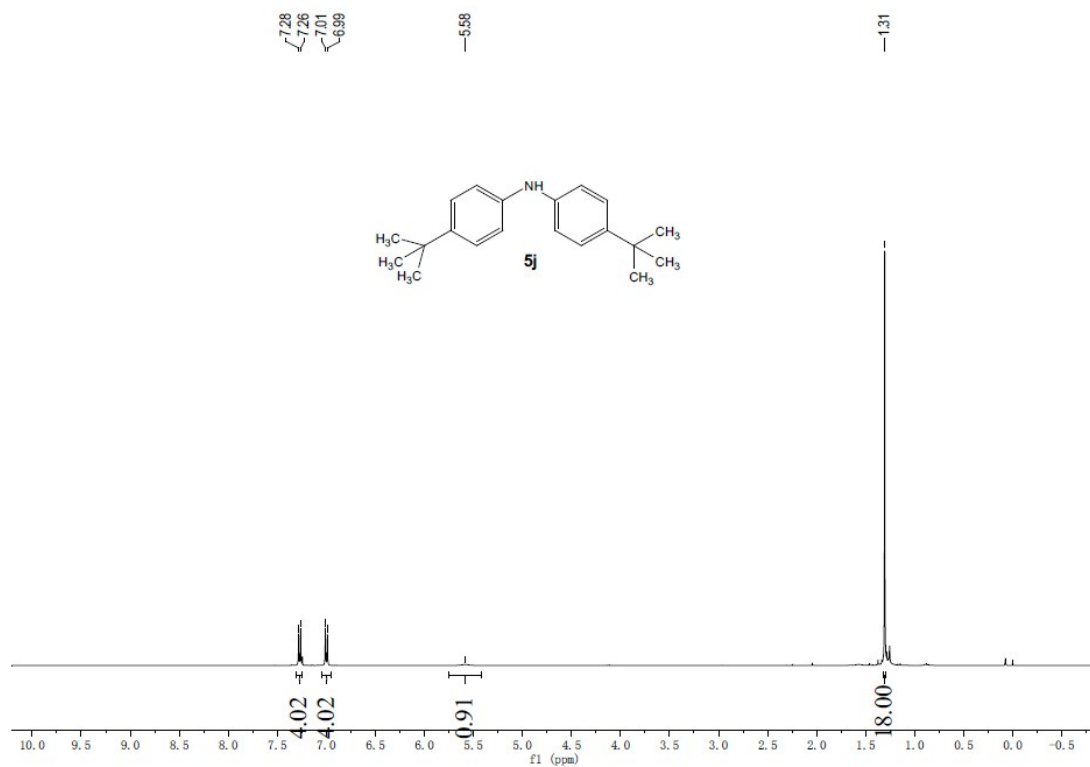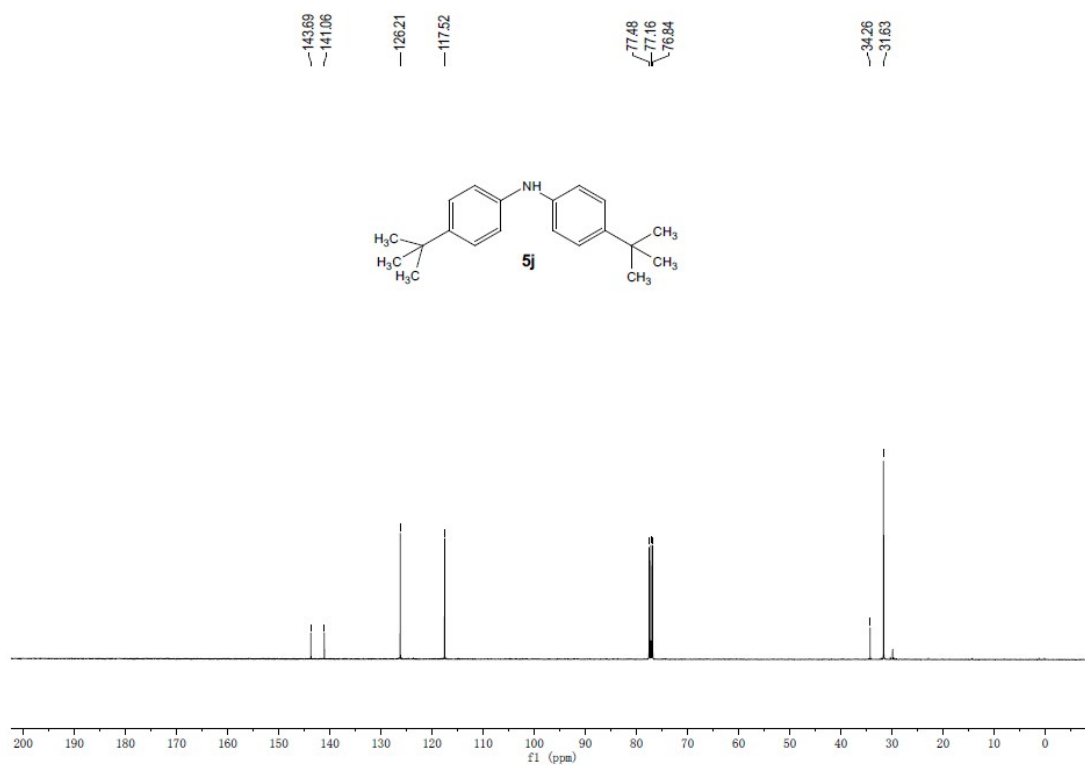

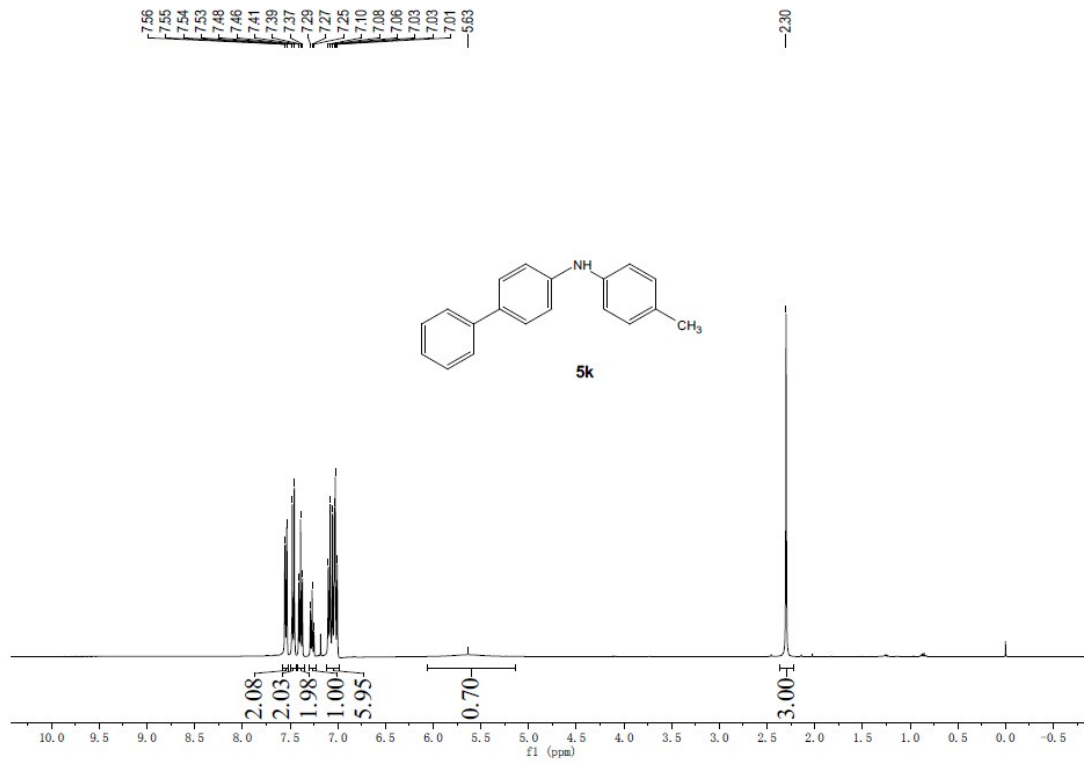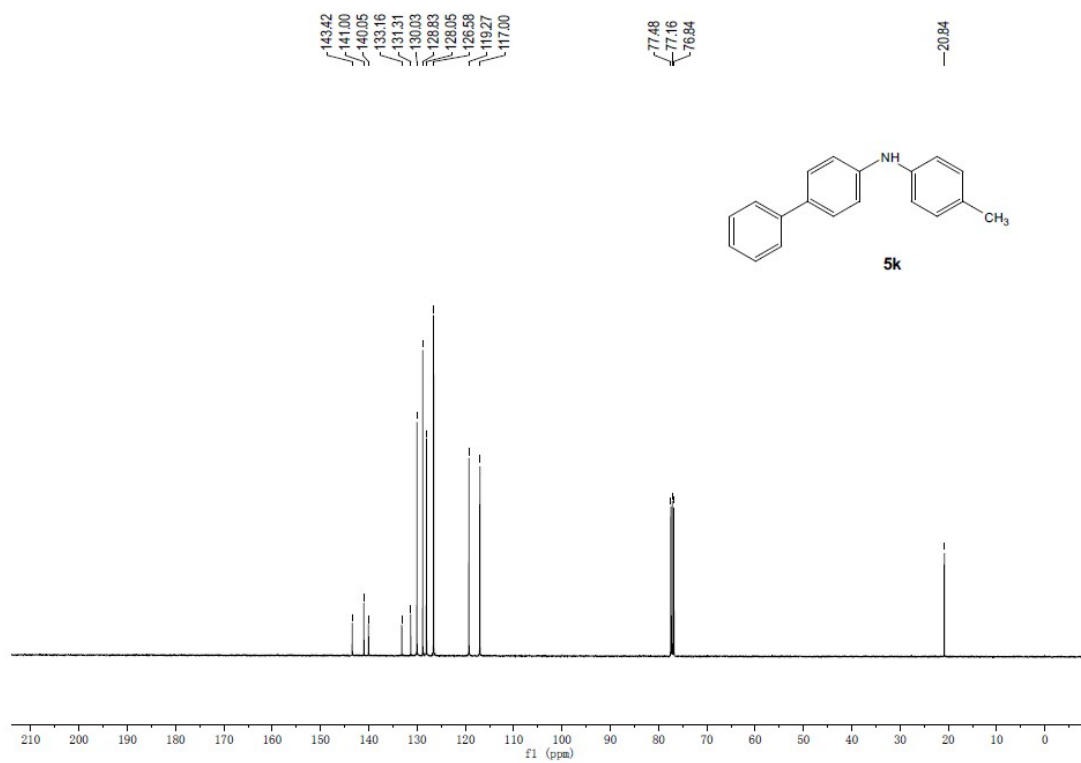



7.58  
7.56  
7.44  
7.42  
7.40  
7.38  
7.35  
7.34  
7.33  
7.32  
7.31  
7.31  
7.30  
7.30  
7.29  
7.28  
7.27  
7.25  
7.17  
7.15  
7.14  
7.14  
7.13  
7.12  
7.11  
7.07  
7.07  
7.07  
7.07  
7.05  
7.05  
7.05  
6.97  
6.95  
6.93

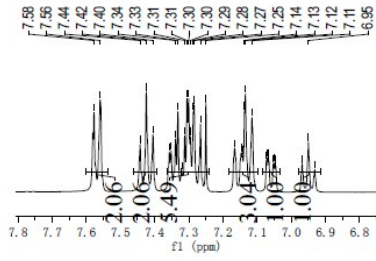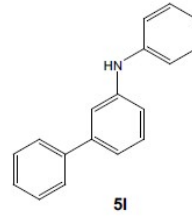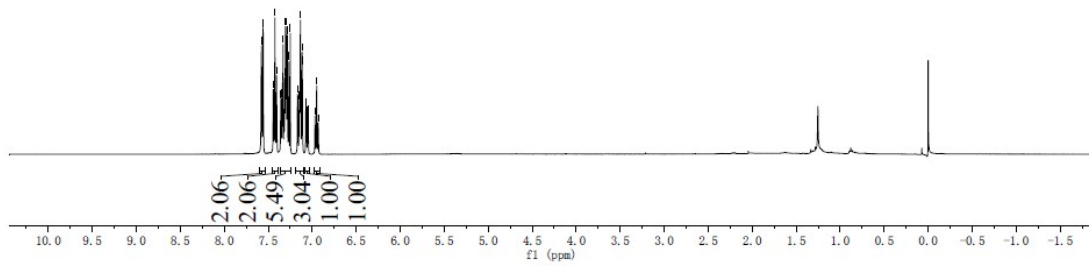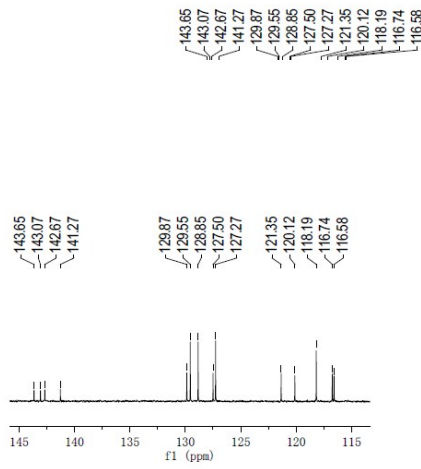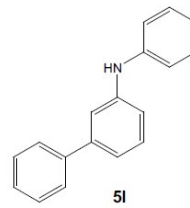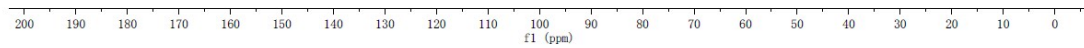

Supplement: c8cc05320k1.pdf [file c8cc05320k1.pdf]
